# Supplementary material for: Associations between participation in organised physical activity in the school or community outside school hours and neighbourhood play with child physical activity and sedentary time: a cross-sectional analysis of primary school-aged children from the UK
Source: PubMed Central journal article supplement (PMC5640140; doi:10.1136/bmjopen-2017-017588), 2017-09-14
Supplement: bmjopen-2017-017588.draft_revisions.pdf [file bmjopen-2017-017588.draft_revisions.pdf]

# BMJ Open

BMJ Open is committed to open peer review. As part of this commitment we make the peer review history of every article we publish publicly available.

When an article is published we post the peer reviewers' comments and the authors' responses online. We also post the versions of the paper that were used during peer review. These are the versions that the peer review comments apply to.

The versions of the paper that follow are the versions that were submitted during the peer review process. They are not the versions of record or the final published versions. They should not be cited or distributed as the published version of this manuscript.

BMJ Open is an open access journal and the full, final, typeset and author-corrected version of record of the manuscript is available on our site with no access controls, subscription charges or pay-per-view fees (<http://bmjopen.bmj.com>).

If you have any questions on BMJ Open's open peer review process please email [editorial.bmjopen@bmj.com](mailto:editorial.bmjopen@bmj.com)

# BMJ Open

## Associations between participation in organised physical activity in the school or community outside school hours, and neighbourhood play with child physical activity and sedentary time: a cross-sectional analysis

|                                 |                                                                                                                                                                                                                                                                                                                                                                                                                                                                                                                                                                                                                                                                                                                                                                  |
|---------------------------------|------------------------------------------------------------------------------------------------------------------------------------------------------------------------------------------------------------------------------------------------------------------------------------------------------------------------------------------------------------------------------------------------------------------------------------------------------------------------------------------------------------------------------------------------------------------------------------------------------------------------------------------------------------------------------------------------------------------------------------------------------------------|
| Journal:                        | <i>BMJ Open</i>                                                                                                                                                                                                                                                                                                                                                                                                                                                                                                                                                                                                                                                                                                                                                  |
| Manuscript ID                   | bmjopen-2017-017588                                                                                                                                                                                                                                                                                                                                                                                                                                                                                                                                                                                                                                                                                                                                              |
| Article Type:                   | Research                                                                                                                                                                                                                                                                                                                                                                                                                                                                                                                                                                                                                                                                                                                                                         |
| Date Submitted by the Author:   | 02-May-2017                                                                                                                                                                                                                                                                                                                                                                                                                                                                                                                                                                                                                                                                                                                                                      |
| Complete List of Authors:       | Jago, Russell; Univ Bristol, Centre for Exercise, Nutrition & Health Sciences, School for Policy Studies<br>Macdonald-Wallis, Corrie; University of Bristol, Centre for Exercise, Nutrition & Health Sciences, School for Policy Studies, University of Bristol<br>Solomon-Moore, Emma; Univ Bristol, Centre for Exercise, Nutrition & Health Sciences, School for Policy Studies<br>Thompson, Janice; The University of Birmingham, School of Sport, Exercise and Rehabilitation Sciences<br>Lawlor, Debbie; University of Bristol School of Social and Community Medicine, MRC Integrative Epidemiology Unit at the University of Bristol<br>Sebire, Simon; University of Bristol, Centre for Exercise, Nutrition & Health Sciences, School for Policy Studies |
| <b>Primary Subject Heading</b>: | Public health                                                                                                                                                                                                                                                                                                                                                                                                                                                                                                                                                                                                                                                                                                                                                    |
| Secondary Subject Heading:      | Paediatrics                                                                                                                                                                                                                                                                                                                                                                                                                                                                                                                                                                                                                                                                                                                                                      |
| Keywords:                       | Physical activity, children, accelerometer, extra-curricular, play                                                                                                                                                                                                                                                                                                                                                                                                                                                                                                                                                                                                                                                                                               |
|                                 |                                                                                                                                                                                                                                                                                                                                                                                                                                                                                                                                                                                                                                                                                                                                                                  |

SCHOLARONE™  
Manuscripts

1  
2  
3 1 Associations between participation in organised physical activity in the school or community  
4  
5 2 outside school hours, and neighbourhood play with child physical activity and sedentary  
6  
7 3 time: a cross-sectional analysis  
8  
9  
10 4

11  
12  
13 5 Russell Jago<sup>1§</sup>, Corrie Macdonald-Wallis<sup>1</sup>, Emma Solomon-Moore<sup>1</sup>, Janice L. Thompson<sup>2</sup>,  
14  
15 6 Deborah A. Lawlor<sup>3,4</sup> and Simon J. Sebire<sup>1</sup>  
16  
17  
18 7

19  
20 8 <sup>1</sup> Centre for Exercise, Nutrition & Health Sciences, School for Policy Studies, University of  
21  
22 9 Bristol, 8 Priory Road, Bristol, BS8 1TZ, UK.  
23

24  
25 10 <sup>2</sup> School of Sport, Exercise and Rehabilitation Sciences, University of Birmingham,  
26  
27 11 Birmingham, B15 2TT, UK.  
28

29  
30 12 <sup>3</sup> MRC Integrative Epidemiology Unit at the University of Bristol, Oakfield House, Oakfield  
31  
32 13 Grove, Bristol, BS8 2BN, UK.  
33

34  
35 14 <sup>4</sup> School of Social and Community Medicine, University of Bristol, Canynge Hall,  
36  
37 15 Whiteladies Road, Bristol, BS8 2PS, UK.  
38

39  
40 16 <sup>§</sup> **Corresponding author:** Prof Russell Jago, Centre for Exercise, Nutrition & Health  
41  
42 17 Sciences, School for Policy Studies, University of Bristol, 8 Priory Road, Bristol, BS8 1TZ,  
43  
44 18 UK. Email: [russ.jago@bris.ac.uk](mailto:russ.jago@bris.ac.uk); Telephone: +44 (0)117 9546603  
45  
46 19

47  
48 20 **Email addresses**

49  
50 21 RJ: [russ.jago@bris.ac.uk](mailto:russ.jago@bris.ac.uk)  
51  
52 22 CMW: [C.Macdonald-Wallis@bristol.ac.uk](mailto:C.Macdonald-Wallis@bristol.ac.uk)  
53  
54 23 ESM: [Emma.solomon@bristol.ac.uk](mailto:Emma.solomon@bristol.ac.uk)  
55  
56 24 JLT: [j.thompson.1@bham.ac.uk](mailto:j.thompson.1@bham.ac.uk)  
57  
58 25 DAL: [d.a.lawlor@bristol.ac.uk](mailto:d.a.lawlor@bristol.ac.uk)  
59  
60 26 SJS: [simon.sebire@bristol.ac.uk](mailto:simon.sebire@bristol.ac.uk)

27  
28 28 **Word count:** Manuscript = 2979 words

29  
30 **Abstract** = 298 words

1  
2  
3 30 **ABSTRACT**  
4  
5

6 31 **Objectives:** Assess the extent to which participation in organised physical activity in the  
7  
8 32 school or community outside school hours, and neighbourhood play, were associated with  
9  
10 33 children's physical activity and sedentary time.  
11

12 34 **Design:** Cross-sectional study.  
13

14 35 **Setting:** Children were recruited from 47 state funded primary schools in Southwest England.  
15  
16

17 36 **Participants:** 1223 8-9 year old children.  
18

19 37 **Outcome measures:** Accelerometer-assessed moderate-to-vigorous-intensity physical  
20  
21 38 activity (MVPA) and sedentary time.  
22  
23

24 39  
25  
26 40 **Methods:** Children wore an accelerometer and mean minutes of MVPA and sedentary time  
27  
28 41 per day were derived. Children reported their attendance at organised physical activity in the  
29  
30 42 school or community outside school hours, and neighbourhood play, using a piloted  
31  
32 43 questionnaire. Cross-sectional linear and logistic regression were used to examine if  
33  
34 44 attendance frequency at each setting (and all settings combined) was associated with  
35  
36 45 moderate-to-vigorous-intensity physical activity (MVPA) and sedentary time. Multiple  
37  
38 46 imputation methods were used to account for missing data and increase sample size.  
39  
40  
41

42 47  
43  
44 48 **Results:** Children who attended clubs at school 3-4 days per week obtained an average of  
45  
46 49 7.58 (95% CI: 2.7 to 12.4) more minutes of MVPA per day than children who never attended.  
47  
48 50 Report of participation in the three other non-school-based activities were similarly  
49  
50 51 associated with MVPA. Evidence for associations with sedentary time was generally weaker.  
52  
53 52 Associations were similar in girls and boys. When the four different contexts were combined,  
54  
55 53 each additional 1-2 activities participated in per week increased participants' odds (OR: 1.18,  
56  
57  
58  
59  
60

1  
2  
3 54 95% CI: 1.12 to 1.26) of meeting the Government recommendations for 60 minutes of  
4  
5 55 MVPA per day.  
6

7 56  
8

9  
10 57 **Conclusion:** Participating in organised physical activity at school and in the community is  
11  
12 58 associated with greater physical activity and reduced sedentary time among both boys and  
13  
14 59 girls. All four types of activity contribute to overall physical activity, which provides parents  
15  
16 60 with a range of settings in which to help their child be active.  
17

18  
19 61  
20

21  
22 62 **Key words:** Physical activity, children, accelerometer, clubs, extra-curricular, play  
23  
24  
25  
26  
27  
28  
29  
30  
31  
32  
33  
34  
35  
36  
37  
38  
39  
40  
41  
42  
43  
44  
45  
46  
47  
48  
49  
50  
51  
52  
53  
54  
55  
56  
57  
58  
59  
60

1  
2  
3 63 **ARTICLE SUMMARY**  
4  
5

6 64 **Strengths and limitations of this study**  
7

8  
9 65 **Strengths**

- 10  
11 66 • Accelerometer data from a large sample of Year 4 children.  
12  
13 67 • Detailed information on organised physical activity in the school or community  
14  
15 outside school hours, and neighbourhood play.  
16  
17 68  
18 69 • Multiple imputation models to provide estimates for participants with missing data.  
19  
20

21  
22  
23  
24 71 **Limitations**  
25

- 26  
27 72 • Cross-sectional study design.  
28  
29 73 • Data are from a single UK region.  
30  
31  
32  
33  
34  
35  
36  
37  
38  
39  
40  
41  
42  
43  
44  
45  
46  
47  
48  
49  
50  
51  
52  
53  
54  
55  
56  
57  
58  
59  
60

## 74 INTRODUCTION

75 Physical activity is associated with improved mental well-being, reduced risk of obesity and  
76 lower blood pressure among children.[1] Sedentary time may also be a risk factor for non-  
77 communicable diseases but it is not clear if this effect is independent of physical activity.[2-  
78 4] The UK Chief Medical Officers recommend that all children and young people should  
79 engage in at least an hour per day of moderate-to-vigorous-intensity physical activity  
80 (MVPA) and limit sedentary time,[5] however considerable proportions of children do not  
81 meet these guidelines.[6] For example, data from the nationally-representative Millennium  
82 cohort showed that only 51% of 7-8 year olds met the recommendation.[7] The amount of  
83 time children spend engaged in MVPA gradually declines with age, while sedentary time  
84 increases.[6 8-11] Strategies to increase children's physical activity are needed.

85  
86 The majority of interventions to increase children's physical activity have been delivered  
87 during school time.[12 13] These interventions have included strategies such as changes to  
88 the physical education provision and new educational programmes based on information  
89 sharing and personal goal setting.[12-14] Overall, these programmes have tended to report no  
90 effect, weak effects or moderate effects in sub-groups.[12-16] Potential reasons for this are  
91 the difficulty faced in adding interventions to already full school-curricula and the lack of  
92 skills and training that teachers have for delivering a range of activities to engage the  
93 majority of children.[17] As such, there is a need to understand the potential of organised  
94 physical activity outside school hours to increase MVPA.

95  
96 After-school programmes have the potential to facilitate physical activity for children, as  
97 schools have space in which children can be active, staff who can be trained, and many  
98 parents welcome programmes that provide childcare.[16 18-21] Although a number of studies

1  
2  
3 99 have examined the potential of delivering such sessions, it is not clear whether attendance at  
4  
5 100 the programmes currently provided by schools is associated with higher overall levels of  
6  
7 101 MVPA.[18-21] There is also a lack of information about how attendance at community-based  
8  
9 102 physical activity clubs contributes to overall MVPA. Furthermore, as not all children attend  
10  
11 103 after-school programmes, it is not clear how other activities such as playing in the  
12  
13 104 neighbourhood or at home in the garden contribute to overall MVPA. A key question,  
14  
15 105 therefore, is whether the frequency of participation in organised physical activity in the  
16  
17 106 school or community after school hours, neighbourhood play or home play is associated with  
18  
19 107 the MVPA and sedentary time of children. Since some children will be active in all four  
20  
21 108 settings, it would also be informative to examine collective participation across all settings.  
22  
23  
24  
25  
26  
27  
28  
29  
30  
31  
32  
33  
34  
35  
36  
37  
38  
39  
40  
41  
42

110 The aim of this study was to assess among children (8-9 years of age) the extent to which  
111 participation in organised physical activity in the school or community outside school hours,  
112 and playing with friends or family near the home or in the garden were associated with  
113 MVPA and sedentary time. A secondary aim was to examine if there was a cumulative  
114 association between participation in the four different types of activities with both MVPA  
115 and sedentary time.

116

## 117 **METHODS**

118 The current analyses used data from the B-Proact1v study, which has been described in detail  
119 elsewhere.[11 22 23] Briefly, the study aimed to examine physical activity behaviours of  
120 children and their parents over the course of primary school. Between 2012 and 2013, data  
121 were collected from 1299 Year 1 children (5-6 years of age) from 57 schools in Bristol (UK).  
122 Between March 2015 and July 2016, all 57 schools were approached to re-join the study  
123 when the children were in Year 4 (8-9 years of age), with 47 schools agreeing to take part



1  
2  
3 124 (1223 children). The current analyses used data from the Year 4 assessments. The study  
4  
5 125 received ethical approval from the School for Policy Studies Ethics Committee at the  
6  
7 126 University of Bristol, and written parent consent was received for all participants.  
8  
9

10 127

11  
12 128 ***Data collection***

13  
14 129 Data were collected at schools, with children asked to complete a brief questionnaire. As  
15  
16 130 indicators of organised physical activity outside school hours in school and in the community  
17  
18 131 respectively, we asked “How often do you attend... a) a sport or exercise club at school (NOT  
19  
20 132 including PE)? and b) a sport or exercise club at places other than your school (like a football  
21  
22 133 club or ballet)?” To indicate neighbourhood play outside and within the home we asked  
23  
24 134 “How much do you play with your friends and family... a) outside near your home? and b) in  
25  
26 135 your home or garden?”. These questions each had four response options: “Never”, “1-2 days  
27  
28 136 per week”, “3-4 days per week” or “5 days per week”. We assigned these 0, 1, 2 and 3 points  
29  
30 137 respectively and summed responses to derive an overall activity score ranging from 0 to 12,  
31  
32 138 with a higher value indicating a higher frequency of activity participation.  
33  
34

35  
36 139

37  
38 140 Child height was measured to the nearest 0.1cm using a SECA Leicester stadiometer (HAB  
39  
40 141 International, Northampton). Weight was recorded to the nearest 0.1kg using a SECA 899  
41  
42 142 digital scale (HAB International, Northampton). Child Body Mass Index ( $BMI = kg/m^2$ ) was  
43  
44 143 then calculated and converted to an age- and gender-specific standard deviation score.[24 25]  
45  
46 144 Children wore a waist-worn ActiGraph wGT3X-BT accelerometer for five days including  
47  
48 145 two weekend days. Parents provided demographic information via a questionnaire, including  
49  
50 146 child gender and date of birth. Where children’s date of birth was missing (20.5% of  
51  
52 147 children), they were assigned the median age of 9.0 years. Indices of Multiple Deprivation  
53  
54 148 (IMD) scores, based upon the English Indices of Deprivation  
55  
56  
57  
58  
59  
60

1  
2  
3 149 (<http://data.gov.uk/dataset/index-of-multiple-deprivation>), were assigned to each child based  
4  
5 150 on their reported home postcode, where higher IMD scores indicate a greater level of  
6  
7 151 deprivation.  
8

9  
10 152

### 11 153 *Accelerometer data reduction*

12  
13  
14 154 Accelerometer data were processed using Kinesoft (v3.3.75; Kinesoft, Saskatchewan,  
15  
16 155 Canada). At least three valid days of data were required for accelerometer data to be  
17  
18 156 considered complete for a given child and included in analysis, where a valid day was defined  
19  
20 157 as at least 500 minutes of data, after excluding intervals of  $\geq 60$  minutes of zero counts  
21  
22 158 allowing up to two minutes of interruptions. The child's average number of sedentary and  
23  
24 159 MVPA minutes per day were derived using population-specific cut points for children.[26]  
25  
26 160 We also derived a binary variable indicating whether the child's average daily MVPA was  
27  
28 161 greater than the 60 minutes per day recommended by the UK government.[5]  
29  
30 162

### 31 32 33 163 *Analysis*

34  
35 164 The associations of child characteristics (gender, age, BMI z-score, and IMD) with activity  
36  
37 165 participation were examined in the observed data using t-tests, Pearson's correlation  
38  
39 166 coefficients, chi-squared tests and one-way analysis of variance as appropriate.  
40  
41 167

42  
43  
44 168 Multiple imputation of missing data was used to create 20 imputed datasets for the 1223 Year  
45  
46 169 4 children. We used 20 cycles of regression switching and combined regression coefficients  
47  
48 170 across datasets using Rubin's rules.[27] We imputed separately for boys and girls to allow for  
49  
50 171 associations to differ by gender. All exposures (organised physical activity attendance and  
51  
52 172 neighbourhood play), outcomes (sedentary time and MVPA), potential confounders (gender,  
53  
54 173 age, BMI z-score, and IMD) and child's school were included in multiple imputation models,  
55  
56  
57  
58  
59  
60

1  
2  
3 174 and achievement of the MVPA guideline and overall activity score were imputed passively.

4  
5 175 Any children with less than three valid days of accelerometer data had their accelerometer

6  
7 176 measures imputed.

8  
9  
10 177

11  
12  
13 178 We examined the pairwise associations of the activity participation variables by

14  
15 179 dichotomising, cross-tabulating and fitting unadjusted logistic regression models of one

16  
17 180 frequency variable on another.

18  
19  
20  
21 181

22  
23 182 We used linear regression models to examine the associations of activity participation and the

24  
25 183 overall activity score with the child's average sedentary and MVPA minutes per day, and

26  
27 184 logistic regression models to examine associations with achievement of the MVPA guideline.

28  
29 185 In Model 1 we adjusted for gender and age, and in Model 2 we adjusted additionally for BMI

30  
31 186 z-score and IMD. Robust standard errors were used to account for clustering of children

32  
33 187 within schools. Combined Wald tests were used to test for evidence of interaction between

34  
35 188 the child's gender and the exposure of interest.

36  
37  
38  
39 189

40  
41  
42 190 We predicted the children's mean number of sedentary and MVPA minutes per day by

43  
44 191 frequency of participation in each activity based on linear combinations of the regression

45  
46 192 coefficients from fully-adjusted models (Model 2).

47  
48  
49  
50 193

51  
52 194 Regression analyses were repeated restricting to the children who had complete data for all

53  
54 195 exposures, outcomes and co-variables and compared with the multiple imputation analysis.

55  
56  
57  
58  
59  
60

1  
2  
3 196 We also produced scatter plots of sedentary time and MVPA by the overall activity score in  
4  
5 197 the observed data.  
6

7 198

8  
9 199 A sensitivity analysis was performed including accelerometer data for any children who had  
10  
11 200 at least one valid day of measures to assess whether only including accelerometer data for  
12  
13 201 children who recorded at least three valid days influenced our results. All analyses were  
14  
15 202 performed in Stata version 14.0 (StataCorp, 2015).  
16  
17  
18

19 203

## 20 204 **RESULTS**

21  
22 205 The distributions of characteristics of the children in the observed data, multiple imputation  
23  
24 206 datasets and subset with complete information are shown in Table 1. All characteristics  
25  
26 207 showed similar distributions in each of the datasets and had only a small proportion of  
27  
28 208 missing data (maximum 16.1% for accelerometer measures).  
29  
30  
31  
32  
33  
34  
35  
36  
37  
38  
39  
40  
41  
42  
43  
44  
45  
46  
47  
48  
49  
50  
51  
52  
53  
54  
55  
56  
57  
58  
59  
60

Table 1 Characteristics of children who took part in the Year 4 phase of the B-Proact1v Study (observed and multiple imputation) N=1223

| Child Characteristic                                        |                   | Observed data |                | Imputed data<br>(N=1223) | Complete data<br>(N=987) |
|-------------------------------------------------------------|-------------------|---------------|----------------|--------------------------|--------------------------|
|                                                             |                   | N available   | Mean (SD) or % | Mean (SD) or %           | Mean (SD) or %           |
| Sedentary time at Year 4 (mins/day)                         |                   | 1026          | 445.4 (115.4)  | 444.7 (120.1)            | 446.0 (116.9)            |
| MVPA at Year 4 (mins/day)                                   |                   | 1026          | 61.6 (21.9)    | 61.9 (22.5)              | 61.8 (21.8)              |
| Met MVPA guidelines at Year 4                               | No                | 1163          | 53.2           | 52.6                     | 53.4                     |
|                                                             | Yes               |               | 46.8           | 47.4                     | 46.6                     |
| Gender                                                      | Boy               | 1223          | 45.5           | 45.5                     | 44.5                     |
|                                                             | Girl              |               | 54.5           | 54.5                     | 55.5                     |
| Age at Year 4 (years)                                       |                   | 1223          | 9.03 (0.41)    | 9.03 (0.41)              | 9.03 (0.43)              |
| BMI z score at Year 4                                       |                   | 1208          | 0.35 (1.08)    | 0.36 (1.08)              | 0.31 (1.07)              |
| IMD score at Year 4                                         |                   | 1204          | 15.9 (14.1)    | 15.9 (14.2)              | 15.3 (13.6)              |
| Frequency child attends sport/exercise club at school       | Never             | 1215          | 27.8           | 27.9                     | 28.2                     |
|                                                             | 1-2 days per week |               | 45.5           | 45.5                     | 45.8                     |
|                                                             | 3-4 days per week |               | 16.1           | 16.1                     | 16.6                     |
|                                                             | 5 days per week   |               | 10.5           | 10.5                     | 9.4                      |
| Frequency child attends sport/exercise club outside school  | Never             | 1214          | 20.6           | 20.6                     | 19.4                     |
|                                                             | 1-2 days per week |               | 50.2           | 50.2                     | 51.0                     |
|                                                             | 3-4 days per week |               | 20.8           | 20.9                     | 21.5                     |
|                                                             | 5 days per week   |               | 8.3            | 8.3                      | 8.2                      |
| Frequency child plays with friends/family outside near home | Never             | 1205          | 6.3            | 6.4                      | 6.5                      |
|                                                             | 1-2 days per week |               | 33.7           | 33.7                     | 34.3                     |
|                                                             | 3-4 days per week |               | 29.0           | 28.9                     | 29.7                     |
|                                                             | 5 days per week   |               | 31.0           | 30.9                     | 29.5                     |
| Frequency child plays with friends/family in home or garden | Never             | 1199          | 9.6            | 9.7                      | 8.8                      |
|                                                             | 1-2 days per week |               | 34.5           | 34.6                     | 35.0                     |
|                                                             | 3-4 days per week |               | 26.8           | 26.7                     | 27.8                     |
|                                                             | 5 days per week   |               | 29.1           | 29.0                     | 28.5                     |
| Activity frequency score                                    |                   | 1193          | 5.88 (2.29)    | 5.86 (2.29)              | 5.84 (2.26)              |

1  
2  
3 210 *Associations of child characteristics with activity participation*  
4

5 211 Table S1 shows child activity attendance by gender. Girls tended to report lower frequencies  
6  
7 212 of participating in organised physical activity in the school or community outside school  
8  
9 213 hours, and had a lower mean overall activity score. There was no gender difference in  
10  
11 214 friends/family play either in or outside of the home. The associations of other child  
12  
13 215 characteristics with activity participation are shown in Table S2. There was some evidence  
14  
15 216 that children who more frequently attended a sport/exercise club outside of school had a  
16  
17 217 higher mean age. Child BMI was not strongly associated with any particular activity, but  
18  
19 218 there was weak evidence that the overall activity score decreased with increasing BMI Z-  
20  
21 219 score. Children who reported attendance of “Never” or “5 days/week” generally had the  
22  
23 220 highest IMD scores, suggesting a U-shaped association, and there was a negative correlation  
24  
25 221 between the overall activity score and IMD.  
26  
27  
28  
29

30 222

31  
32 223 *Inter-relationships of activity participation frequencies*  
33

34 224 Participating in one type of activity more frequently was generally associated with a higher  
35  
36 225 frequency of participation in each of the others, except that attendance at a sport/exercise club  
37  
38 226 outside of school was not associated with playing outside near the home (Table S3).  
39

40 227

41  
42  
43 228 *Associations of activity participation with sedentary time and MVPA*  
44

45 229 There was a negative correlation of the overall activity score with sedentary time and a  
46  
47 230 positive correlation between the overall activity score and MVPA (Figures S1 and S2).  
48

49 231

50  
51  
52 232 Table 2 shows the mean difference in sedentary time by activity participation and overall  
53  
54 233 activity score in the multiple imputation datasets, and Figure 1 shows the predicted sedentary  
55  
56 234 time by activity participation. Sedentary time decreased on average with increasing frequency  
57  
58  
59  
60

1  
2  
3 235 of attending sport/exercise clubs either at school or outside of school and with increasing  
4  
5 236 frequency of playing with friends/family outside near the home in regression models adjusted  
6  
7 237 for gender and age (Model 1). The association between sport/exercise club attendance outside  
8  
9 238 of school and sedentary time weakened slightly on additional adjustment for BMI Z-score  
10  
11 239 and IMD (Model 2) but other associations remained. An increase in children's overall activity  
12  
13 240 score was also strongly associated with a reduction in sedentary time in both models.  
14  
15  
16 241 However, there was no evidence of an association between playing with friends/family at  
17  
18 242 home and sedentary time. Associations did not differ between boys and girls. Findings were  
19  
20  
21 243 similar when restricted to children who had complete data (Table S4).  
22  
23  
24  
25  
26  
27  
28  
29  
30  
31  
32  
33  
34  
35  
36  
37  
38  
39  
40  
41  
42  
43  
44  
45  
46  
47  
48  
49  
50  
51  
52  
53  
54  
55  
56  
57  
58  
59  
60

**Table 2 Mean difference in the children's average sedentary minutes per day associated with different activities using multiple imputation (N=1223)\***

| Exposure                                                      | Sedentary time (minutes/day): mean difference (95% confidence interval) |                |                |               |               |               |               | P for gender interaction |
|---------------------------------------------------------------|-------------------------------------------------------------------------|----------------|----------------|---------------|---------------|---------------|---------------|--------------------------|
|                                                               | All (N=1223)                                                            |                | Boys (N=556)   |               | Girls (N=667) |               |               |                          |
|                                                               | Model 1                                                                 | Model 2        | Model 1        | Model 2       | Model 1       | Model 2       |               |                          |
| Frequency child attends sport/exercise club at school         | Never (ref)                                                             | 0              | 0              | 0             | 0             | 0             | 0             | 0.69                     |
|                                                               | 1-2 days/week                                                           | -4.2           | -3.0           | 7.9           | 8.9           | -13.0         | -11.5         |                          |
|                                                               | 3-4 days/week                                                           | (-22.5, 14.0)  | (-21.4, 15.4)  | (-16.6, 32.3) | (-15.9, 33.7) | (-38.3, 12.4) | (-37.5, 14.4) |                          |
|                                                               |                                                                         | -31.1          | -28.8          | -18.7         | -16.9         | -40.1         | -37.3         |                          |
|                                                               |                                                                         | (-50.7, -11.5) | (-46.4, -11.3) | (-41.8, 4.4)  | (-41.2, 7.3)  | (-71.7, -8.5) | (-65.4, -9.2) |                          |
| 5 days/week                                                   | -18.7                                                                   | -18.8          | -9.6           | -7.3          | -26.0         | -33.3         |               |                          |
|                                                               | (-42.9, 5.6)                                                            | (-42.1, 4.5)   | (-37.7, 18.4)  | (-34.9, 20.4) | (-66.8, 14.8) | (-82.0, 15.5) |               |                          |
| P for trend                                                   | 0.02                                                                    | 0.01           | 0.17           | 0.23          | 0.05          | 0.04          |               |                          |
| Frequency child attends sport/exercise club outside of school | Never (ref)                                                             | 0              | 0              | 0             | 0             | 0             | 0             | 0.81                     |
|                                                               | 1-2 days/week                                                           | 14.8           | 18.0           | 21.5          | 25.9          | 11.0          | 13.6          |                          |
|                                                               | 3-4 days/week                                                           | (-9.1, 38.7)   | (-8.9, 45.0)   | (-7.4, 50.5)  | (-4.5, 56.4)  | (-19.9, 42.0) | (-20.5, 47.7) |                          |
|                                                               |                                                                         | -7.2           | -1.5           | -1.0          | 4.8           | -10.5         | -4.1          |                          |
|                                                               |                                                                         | (-27.0, 12.6)  | (-23.4, 20.4)  | (-32.8, 30.8) | (-27.1, 36.6) | (-30.5, 9.5)  | (-27.3, 19.0) |                          |
| 5 days/week                                                   | -19.9                                                                   | -15.5          | -12.6          | -7.7          | -25.2         | -20.6         |               |                          |
|                                                               | (-41.1, 1.2)                                                            | (-37.7, 6.8)   | (-42.4, 17.1)  | (-36.5, 21.1) | (-55.0, 4.6)  | (-52.1, 11.0) |               |                          |
| P for trend                                                   | 0.02                                                                    | 0.07           | 0.12           | 0.16          | 0.07          | 0.23          |               |                          |
| Frequency child plays with friends/family outside near home   | Never (ref)                                                             | 0              | 0              | 0             | 0             | 0             | 0             | 0.56                     |
|                                                               | 1-2 days/week                                                           | 0.77           | 2.3            | 19.2          | 21.2          | -16.6         | -15.6         |                          |
|                                                               | 3-4 days/week                                                           | (-28.5, 30.0)  | (-28.0, 32.7)  | (-16.5, 55.0) | (-14.4, 56.8) | (-63.1, 30.0) | (-65.0, 33.9) |                          |
|                                                               |                                                                         | -5.2           | -2.8           | 7.6           | 10.6          | -17.6         | -16.1         |                          |
|                                                               |                                                                         | (-29.9, 19.6)  | (-29.4, 23.7)  | (-28.4, 43.5) | (-25.5, 46.6) | (-65.8, 30.5) | (-67.4, 35.3) |                          |
| 5 days/week                                                   | -23.4                                                                   | -24.1          | -11.0          | -10.2         | -35.4         | -37.8         |               |                          |
|                                                               | (-49.0, 2.1)                                                            | (-50.8, 2.7)   | (-45.2, 23.2)  | (-44.4, 24.0) | (-79.9, 9.0)  | (-86.6, 10.9) |               |                          |
| P for trend                                                   | 0.004                                                                   | 0.001          | 0.07           | 0.05          | 0.02          | 0.02          |               |                          |
| Frequency child plays with friends/family in home/garden      | Never (ref)                                                             | 0              | 0              | 0             | 0             | 0             | 0             | 0.90                     |
|                                                               | 1-2 days/week                                                           | 16.2           | 17.9           | 19.2          | 20.6          | 13.1          | 14.9          |                          |
|                                                               | 3-4 days/week                                                           | (-13.8, 46.3)  | (-12.5, 48.2)  | (-22.9, 61.3) | (-21.5, 62.7) | (-25.8, 52.0) | (-24.3, 54.1) |                          |
|                                                               |                                                                         | -3.9           | -0.7           | 3.9           | 6.5           | -10.7         | -6.4          |                          |
|                                                               |                                                                         | (-28.8, 20.9)  | (-26.7, 25.4)  | (-30.5, 38.4) | (-28.7, 41.7) | (-46.6, 25.3) | (-42.9, 30.1) |                          |
| 5 days/week                                                   | 5.3                                                                     | 6.1            | 9.9            | 11.6          | 1.2           | 0.6           |               |                          |
|                                                               | (-22.9, 33.5)                                                           | (-22.5, 34.7)  | (-32.5, 52.3)  | (-31.2, 54.4) | (-39.2, 41.5) | (-40.2, 41.5) |               |                          |
| P for trend                                                   | 0.49                                                                    | 0.49           | 0.85           | 0.91          | 0.49          | 0.45          |               |                          |
| Activity score (per unit)                                     | -4.8                                                                    | -4.6           | -3.8           | -3.4          | -5.9          | -5.9          | 0.41          |                          |
|                                                               | (-7.3, -2.3)                                                            | (-7.0, -2.1)   | (-7.7, 0.1)    | (-7.2, 0.4)   | (-10.0, -1.7) | (-10.2, -1.6) |               |                          |

\*Model 1 is adjusted for age and gender; Model 2 is additionally adjusted for BMI and IMD score



1  
2  
3 246 The mean difference in MVPA by each of the activity variables in the multiple imputation  
4  
5 247 data is shown in Table 3, with predicted MVPA by activity participation presented in Figure  
6  
7 248 2. A higher frequency of attending sport/exercise clubs either at school or outside of school  
8  
9 249 and of play either outside or in the home/garden were all associated with greater MVPA on  
10  
11 250 average in Models 1 and 2. Associations were similar in boys and girls. A higher overall  
12  
13 251 activity score was also associated with greater MVPA, with some evidence that this  
14  
15 252 association was stronger in boys than in girls. Associations were similar when restricted to  
16  
17 253 children with complete data (Table S5).  
18  
19  
20  
21  
22  
23  
24  
25  
26  
27  
28  
29  
30  
31  
32  
33  
34  
35  
36  
37  
38  
39  
40  
41  
42  
43  
44  
45  
46  
47  
48  
49  
50  
51  
52  
53  
54  
55  
56  
57  
58  
59  
60

Table 3 Mean difference in the children's average MVPA minutes per day associated with different activities using multiple imputation (N=1223)\*

| Exposure                                                      | Moderate-to-vigorous physical activity (minutes/day): mean difference (95% confidence interval) |                     |                     |                     |                     |                     |                          |      |
|---------------------------------------------------------------|-------------------------------------------------------------------------------------------------|---------------------|---------------------|---------------------|---------------------|---------------------|--------------------------|------|
|                                                               | All (N=1223)                                                                                    |                     | Boys (N=556)        |                     | Girls (N=667)       |                     | P for gender interaction |      |
|                                                               | Model 1                                                                                         | Model 2             | Model 1             | Model 2             | Model 1             | Model 2             |                          |      |
| Frequency child attends sport/exercise club at school         | Never (ref)                                                                                     | 0                   | 0                   | 0                   | 0                   | 0                   | 0                        | 0.64 |
|                                                               | 1-2 days/week                                                                                   | 3.7<br>(0.3, 7.2)   | 3.6<br>(0.1, 7.0)   | 4.4<br>(-2.1, 10.9) | 4.1<br>(-2.3, 10.5) | 3.2<br>(-0.3, 6.7)  | 3.1<br>(-0.3, 6.6)       |      |
|                                                               | 3-4 days/week                                                                                   | 7.8<br>(2.9, 12.6)  | 7.5<br>(2.7, 12.4)  | 10.1<br>(2.6, 17.7) | 9.6<br>(2.0, 17.2)  | 5.9<br>(0.9, 10.8)  | 5.8<br>(0.9, 10.7)       |      |
|                                                               | 5 days/week                                                                                     | 5.9<br>(-0.1, 11.8) | 5.7<br>(-0.3, 11.7) | 7.5<br>(-0.4, 15.4) | 7.0<br>(-1.1, 15.0) | 3.8<br>(-3.7, 11.3) | 3.6<br>(-4.1, 11.4)      |      |
|                                                               | P for trend                                                                                     | 0.007               | 0.01                | 0.02                | 0.03                | 0.05                | 0.06                     |      |
| Frequency child attends sport/exercise club outside of school | Never (ref)                                                                                     | 0                   | 0                   | 0                   | 0                   | 0                   | 0                        | 0.80 |
|                                                               | 1-2 days/week                                                                                   | 0.9<br>(-2.5, 4.3)  | 0.7<br>(-2.9, 4.4)  | 1.8<br>(-4.7, 8.3)  | 1.3<br>(-5.5, 8.2)  | 0.5<br>(-3.3, 4.4)  | 0.5<br>(-3.4, 4.5)       |      |
|                                                               | 3-4 days/week                                                                                   | 6.9<br>(2.4, 11.5)  | 6.5<br>(1.9, 11.2)  | 8.9<br>(1.0, 16.8)  | 8.1<br>(0.1, 16.0)  | 5.5<br>(0.9, 10.1)  | 5.6<br>(1.1, 10.2)       |      |
|                                                               | 5 days/week                                                                                     | 9.9<br>(3.8, 16.0)  | 9.6<br>(3.3, 15.9)  | 11.8<br>(3.4, 20.1) | 11.2<br>(2.4, 19.9) | 8.2<br>(0.7, 15.7)  | 8.2<br>(0.8, 15.7)       |      |
|                                                               | P for trend                                                                                     | <0.001              | <0.001              | 0.001               | 0.002               | 0.007               | 0.006                    |      |
| Frequency child plays with friends/family outside near home   | Never (ref)                                                                                     | 0                   | 0                   | 0                   | 0                   | 0                   | 0                        | 0.19 |
|                                                               | 1-2 days/week                                                                                   | 0.7<br>(-4.6, 6.0)  | 0.4<br>(-4.9, 5.6)  | 0.0<br>(-9.3, 9.2)  | -0.5<br>(-9.9, 8.9) | 1.4<br>(-6.0, 8.8)  | 1.3<br>(-6.2, 8.7)       |      |
|                                                               | 3-4 days/week                                                                                   | 5.1<br>(-0.9, 11.1) | 4.8<br>(-1.1, 10.7) | 6.1<br>(-4.1, 16.3) | 5.7<br>(-4.5, 15.9) | 4.4<br>(-3.5, 12.3) | 4.3<br>(-3.7, 12.2)      |      |
|                                                               | 5 days/week                                                                                     | 9.6<br>(4.0, 15.3)  | 9.5<br>(3.9, 15.2)  | 13.0<br>(3.3, 22.8) | 12.9<br>(3.0, 22.7) | 6.7<br>(-0.7, 14.0) | 6.6<br>(-0.9, 14.0)      |      |
|                                                               | P for trend                                                                                     | <0.001              | <0.001              | <0.001              | <0.001              | 0.005               | 0.006                    |      |
| Frequency child plays with friends/family in home/garden      | Never (ref)                                                                                     | 0                   | 0                   | 0                   | 0                   | 0                   | 0                        | 0.38 |
|                                                               | 1-2 days/week                                                                                   | 2.0<br>(-2.4, 6.4)  | 1.6<br>(-2.7, 6.0)  | -0.1<br>(-8.4, 8.3) | -0.6<br>(-8.9, 7.7) | 3.8<br>(-2.2, 9.8)  | 3.6<br>(-2.4, 9.7)       |      |
|                                                               | 3-4 days/week                                                                                   | 5.6<br>(0.9, 10.3)  | 5.3<br>(0.4, 10.2)  | 5.6<br>(-3.1, 14.3) | 5.4<br>(-3.5, 14.4) | 5.7<br>(-0.6, 11.9) | 5.5<br>(-0.9, 12.0)      |      |
|                                                               | 5 days/week                                                                                     | 7.4<br>(3.0, 11.8)  | 7.1<br>(2.7, 11.6)  | 8.3<br>(0.1, 16.6)  | 7.7<br>(-0.7, 16.1) | 6.6<br>(0.7, 12.5)  | 6.5<br>(0.6, 12.5)       |      |
|                                                               | P for trend                                                                                     | <0.001              | <0.001              | <0.001              | <0.001              | 0.005               | 0.006                    |      |

|   |                           |            |            |            |            |            |            |      |
|---|---------------------------|------------|------------|------------|------------|------------|------------|------|
| 1 |                           |            |            |            |            |            |            |      |
| 2 | P for trend               | <0.001     | <0.001     | 0.004      | 0.006      | 0.02       | 0.02       | 255  |
| 3 | Activity score (per unit) | 2.1        | 2.0        | 2.6        | 2.5        | 1.6        | 1.6        | 0.06 |
| 4 |                           | (1.4, 2.7) | (1.4, 2.7) | (1.7, 3.4) | (1.6, 3.4) | (0.8, 2.3) | (0.8, 2.3) | 256  |
| 5 |                           |            |            |            |            |            |            |      |

6  
 7 \*MVPA Moderate-to-vigorous physical activity; Model 1 is adjusted for age and gender; Model 2 is additionally adjusted for BMI and IMD score

8  
 9  
 10  
 11  
 12  
 13  
 14  
 15  
 16  
 17  
 18  
 19  
 20  
 21  
 22  
 23  
 24  
 25  
 26  
 27  
 28  
 29  
 30  
 31  
 32  
 33  
 34  
 35  
 36  
 37  
 38  
 39  
 40  
 41  
 42  
 43  
 44  
 45  
 46  
 47  
 48  
 49

For peer review only

1  
2  
3 258 The associations of activity variables with achievement of the hour per day government  
4  
5 259 guideline in the multiple imputation data are shown in Table 4. A higher frequency of  
6  
7 260 participation in any of the activities, or an increase in the overall activity score, was  
8  
9 261 associated with increased odds of meeting the government guideline in both models.  
10  
11 262 Associations were similar in girls and boys. A unit increase in the activity score was  
12  
13 263 associated with around an 18% increase in the odds of achieving 60 minutes of MVPA per  
14  
15 264 day. Findings were unchanged when restricting to those with complete data (Table S6).  
16  
17  
18  
19  
20  
21  
22  
23  
24  
25  
26  
27  
28  
29  
30  
31  
32  
33  
34  
35  
36  
37  
38  
39  
40  
41  
42  
43  
44  
45  
46  
47  
48  
49  
50  
51  
52  
53  
54  
55  
56  
57  
58  
59  
60

Table 4 Odds ratios for achieving 60 minutes of MVPA per day associated with different activities using multiple imputation (N=1223)\*

| Exposure                                                      |               | Meeting government guideline: odds ratio (95% confidence interval) |                      |                      |                      |                      |                      | P for gender interaction |
|---------------------------------------------------------------|---------------|--------------------------------------------------------------------|----------------------|----------------------|----------------------|----------------------|----------------------|--------------------------|
|                                                               |               | All (N=1223)                                                       |                      | Boys (N=556)         |                      | Girls (N=667)        |                      |                          |
|                                                               |               | Model 1                                                            | Model 2              | Model 1              | Model 2              | Model 1              | Model 2              |                          |
| Frequency child attends sport/exercise club at school         | Never (ref)   | 1                                                                  | 1                    | 1                    | 1                    | 1                    | 1                    | 0.34                     |
|                                                               | 1-2 days/week | 1.33<br>(0.98, 1.81)                                               | 1.31<br>(0.97, 1.78) | 1.10<br>(0.65, 1.86) | 1.07<br>(0.63, 1.81) | 1.54<br>(1.06, 2.23) | 1.54<br>(1.07, 2.21) |                          |
|                                                               | 3-4 days/week | 1.87<br>(1.16, 3.01)                                               | 1.83<br>(1.14, 2.93) | 2.22<br>(1.09, 4.53) | 2.14<br>(1.04, 4.40) | 1.63<br>(0.94, 2.85) | 1.63<br>(0.94, 2.82) |                          |
|                                                               | 5 days/week   | 1.69<br>(1.03, 2.78)                                               | 1.67<br>(1.02, 2.76) | 1.61<br>(0.83, 3.09) | 1.55<br>(0.79, 3.02) | 1.76<br>(0.84, 3.69) | 1.77<br>(0.84, 3.73) |                          |
| P for trend                                                   |               | 0.01                                                               | 0.01                 | 0.03                 | 0.05                 | 0.05                 | 0.05                 |                          |
| Frequency child attends sport/exercise club outside of school | Never (ref)   | 1                                                                  | 1                    | 1                    | 1                    | 1                    | 1                    | 0.93                     |
|                                                               | 1-2 days/week | 1.14<br>(0.80, 1.64)                                               | 1.13<br>(0.77, 1.64) | 1.21<br>(0.74, 1.98) | 1.18<br>(0.70, 1.99) | 1.11<br>(0.68, 1.80) | 1.12<br>(0.69, 1.82) |                          |
|                                                               | 3-4 days/week | 1.82<br>(1.22, 2.72)                                               | 1.75<br>(1.16, 2.65) | 2.07<br>(1.11, 3.87) | 1.95<br>(1.03, 3.67) | 1.66<br>(0.99, 2.78) | 1.69<br>(1.01, 2.83) |                          |
|                                                               | 5 days/week   | 2.70<br>(1.57, 4.62)                                               | 2.63<br>(1.51, 4.58) | 3.24<br>(1.49, 7.07) | 3.15<br>(1.41, 7.06) | 2.30<br>(1.12, 4.72) | 2.33<br>(1.14, 4.77) |                          |
| P for trend                                                   |               | <0.001                                                             | <0.001               | <0.001               | 0.001                | 0.009                | 0.008                |                          |
| Frequency child plays with friends/family outside near home   | Never (ref)   | 1                                                                  | 1                    | 1                    | 1                    | 1                    | 1                    | 0.74                     |
|                                                               | 1-2 days/week | 1.15<br>(0.70, 1.88)                                               | 1.12<br>(0.69, 1.82) | 0.98<br>(0.46, 2.09) | 0.94<br>(0.43, 2.06) | 1.47<br>(0.62, 3.45) | 1.47<br>(0.63, 3.43) |                          |
|                                                               | 3-4 days/week | 1.88<br>(1.12, 3.16)                                               | 1.84<br>(1.11, 3.06) | 1.62<br>(0.73, 3.58) | 1.59<br>(0.70, 3.58) | 2.32<br>(0.91, 5.91) | 2.32<br>(0.92, 5.88) |                          |
|                                                               | 5 days/week   | 2.11<br>(1.26, 3.52)                                               | 2.10<br>(1.26, 3.49) | 2.08<br>(0.92, 4.69) | 2.07<br>(0.91, 4.74) | 2.35<br>(0.93, 5.99) | 2.36<br>(0.93, 6.02) |                          |
| P for trend                                                   |               | <0.001                                                             | <0.001               | 0.003                | 0.002                | 0.01                 | 0.02                 |                          |
| Frequency child plays with friends/family in home/garden      | Never (ref)   | 1                                                                  | 1                    | 1                    | 1                    | 1                    | 1                    | 0.21                     |
|                                                               | 1-2 days/week | 1.27<br>(0.84, 1.91)                                               | 1.23<br>(0.81, 1.86) | 0.94<br>(0.52, 1.72) | 0.90<br>(0.49, 1.64) | 1.75<br>(0.84, 3.64) | 1.75<br>(0.84, 3.65) |                          |
|                                                               | 3-4 days/week | 1.51<br>(1.00, 2.28)                                               | 1.46<br>(0.96, 2.23) | 1.29<br>(0.70, 2.40) | 1.28<br>(0.68, 2.44) | 1.80<br>(0.86, 3.80) | 1.80<br>(0.86, 3.79) |                          |
|                                                               | 5 days/week   | 1.71<br>(1.14, 2.56)                                               | 1.67<br>(1.11, 2.53) | 1.71<br>(0.90, 3.25) | 1.62<br>(0.83, 3.14) | 1.80<br>(0.88, 3.69) | 1.81<br>(0.88, 3.70) |                          |

|                           |                      |                      |                      |                      |                      |                      |             |
|---------------------------|----------------------|----------------------|----------------------|----------------------|----------------------|----------------------|-------------|
| P for trend               | 0.005                | 0.006                | 0.01                 | 0.02                 | 0.21                 | 0.21                 | 266         |
| Activity score (per unit) | 1.18<br>(1.12, 1.25) | 1.18<br>(1.11, 1.25) | 1.21<br>(1.12, 1.30) | 1.20<br>(1.11, 1.30) | 1.16<br>(1.07, 1.25) | 1.16<br>(1.07, 1.25) | 0.52<br>267 |

\* MVPA Moderate-to-vigorous physical activity; Model 1 is adjusted for age and gender; Model 2 is additionally adjusted for BMI and IMD score

For peer review only

1  
2  
3 269 *Sensitivity Analysis*  
4

5 270 When we changed the inclusion criteria for accelerometer measures from three to one valid  
6  
7 271 day, findings were largely unchanged, except that boys showed a stronger association  
8  
9 272 between sport/exercise club attendance at their school and MVPA than girls (p for interaction  
10  
11 273 = 0.03 in multiple imputation data).  
12  
13

14 274

15  
16 275 **DISCUSSION**  
17

18 276 The findings demonstrate that increased participation in organised physical activity at school  
19  
20 277 and in the community are associated with greater overall physical activity and reduced  
21  
22 278 sedentary time among both boys and girls. Specifically, a child who attends a school-based  
23  
24 279 club 3-4 days per week obtained 7.8 more minutes of MVPA per day than a child who did not  
25  
26 280 attend at all, with attendance of five days a week at a sport/exercise club outside of school  
27  
28 281 associated with 10.9 more minutes of MVPA than children who never attended clubs. There  
29  
30 282 were comparable patterns for engagement in non-organised activity at home or in the  
31  
32 283 neighbourhood, both were associated with increased MVPA, but only activity outside of the  
33  
34 284 home was associated with reduced sedentary time. When the four different contexts of  
35  
36 285 physical activity were combined, the analyses showed that each additional 1-2 activities  
37  
38 286 participated in per week increased the odds of meeting the Chief Medical Officers'  
39  
40 287 recommendation of 60 minutes of MVPA per day by 18%. Thus, encouraging children to  
41  
42 288 attend after-school and community-based physical activity clubs, as well as to play at home  
43  
44 289 and in the neighbourhood is critical for helping children to increase MVPA. Moreover, in  
45  
46 290 light of the relative consistency in findings for each of the four forms of physical activity, the  
47  
48 291 message to parents should be that physical activity can be accumulated in all four settings  
49  
50 292 which allows them to find a balance that works for their family. For some families with  
51  
52 293 working parents, after-school programmes may be the key activity to focus on, whereas for  
53  
54  
55  
56  
57  
58  
59  
60

1  
2  
3 294 other families encouraging children to play in the neighbourhood is likely to be useful for  
4  
5 295 maximising physical activity. Furthermore, as there was little evidence that play at home was  
6  
7 296 associated with a reduction in sedentary time, it is also important to examine ways of  
8  
9  
10 297 encouraging non-sedentary activities within the home.

11  
12 298

13  
14 299 The UK Childhood Obesity strategy recommends that all primary schools should provide at  
15  
16 300 least 30 minutes per day of physical activity opportunities across the curriculum, break times  
17  
18 301 and extra-curricular activities.[28] The data presented here show that in the imputed dataset  
19  
20 302 72.2% of Year 4 children were attending school-based programmes at least once per week  
21  
22 303 and 10.5% were attending five days per week. Previous research has shown that in the UK,  
23  
24 304 after-school clubs for primary school children tend to be dominated by team sports, such as  
25  
26 305 football and rugby, with limited provision for non-competitive physical activities.[29] Thus,  
27  
28 306 increasing the number and variety of sessions that children attend and improving the quality  
29  
30 307 of those sessions is likely to provide a cost effective means of increasing children's physical  
31  
32 308 activity. This hypothesis is consistent with the recent Theory of Expanded, Extended and  
33  
34 309 Enhanced Opportunities (TEO), which suggests that the most effective means of increasing  
35  
36 310 children's physical activity will be provided by extending and expanding current  
37  
38 311 provision.[19] Thus, schools and community groups should be encouraged to extend current  
39  
40 312 after-school provision to more children, diversify the activities to interest more pupils  
41  
42 313 (preferably involving pupils in deciding what activities to offer), and enhance the quality of  
43  
44 314 provision to maximise the amount of activity obtained. These relatively simple changes could  
45  
46 315 be made at each school and would provide scalable ways for increasing overall levels of  
47  
48 316 physical activity and contributing to the UK government's goal of reducing the prevalence of  
49  
50 317 childhood obesity.

51  
52 318  
53  
54  
55  
56  
57  
58  
59  
60



1  
2  
3 319 ***Strengths and limitations***  
4

5 320 The major strength of this study is the large sample size and provision of detailed information  
6  
7 321 about participation in four different physical activity settings alongside accelerometer-  
8  
9 322 assessed physical activity. In addition, the use of multiple imputation models to provide  
10  
11 323 estimates for participants with missing data using a robust methodology has enabled us to  
12  
13 324 maximise the sample for analysis. The study is limited by the cross-sectional design, which  
14  
15 325 limits the ability to infer causation between frequency of participation in different settings  
16  
17 326 and levels of physical activity. All questions were self-reported and it is possible that some  
18  
19 327 were recalled more accurately than others. The report of play within the home is likely to  
20  
21 328 include both sedentary and physically active forms of play, as the question included play  
22  
23 329 indoors, which could be expected to be more sedentary, as well as outdoors in the garden,  
24  
25 330 which is likely to be more active. We were unable to disentangle these. We also cannot rule  
26  
27 331 out the possibility of residual confounding, but have adjusted for several key potential  
28  
29 332 confounding variables in order to minimise this. The study is also drawn from the greater  
30  
31 333 Bristol area in the UK and as such our ability to extend findings to other settings and  
32  
33 334 countries is limited.  
34  
35  
36  
37  
38  
39

40 335

41 336 **CONCLUSIONS**

42  
43 337 Participation in organised physical activity at school and in the community is associated with  
44  
45 338 greater physical activity and reduced sedentary time among both boys and girls. In light of  
46  
47 339 the challenges of promoting physical activity during school time, parents should encourage  
48  
49 340 children to attend after school clubs, attend community activity groups and play in the  
50  
51 341 neighbourhood to help their children to meet physical activity guidelines. The data show that  
52  
53 342 all four types of activity contribute similarly to overall physical activity and there is therefore  
54  
55 343 an opportunity for families to find the best mix of options for them.  
56  
57  
58  
59  
60

1  
2  
3 3444  
5 345 **ACKNOWLEDGEMENTS**

6  
7 346 This work was supported by grants from the British Heart Foundation (ref PG/11/51/28986  
8  
9 347 and SP 14/4/31123). DAL works in a unit that receives funding from the University of Bristol  
10  
11 348 and UK Medical Research Council (MC\_UU\_1201/5); she is also a UK National Institute of  
12  
13 349 Health and Research Senior Investigator (NF-SI-0166-10196). The funders had no  
14  
15 350 involvement in data analysis, data interpretation or writing of the paper.

16  
17  
18  
19 351 We would like to thank all of the families and schools that have taken part in the B-  
20  
21 352 PROACTIV project. We would also like to thank all current and previous members of the  
22  
23 353 research team who are not authors on this paper.  
24

25  
26 35427  
28 355 **COMPETING INTERESTS**

29  
30 356 All authors have completed the ICMJE uniform disclosure form at  
31  
32 357 [www.icmje.org/coi\\_disclosure.pdf](http://www.icmje.org/coi_disclosure.pdf) and declare: all authors had financial support from the  
33  
34 358 British Heart Foundation for the submitted work; no financial relationships with any  
35  
36 359 organisations that might have an interest in the submitted work in the previous three years; no  
37  
38 360 other relationships or activities that could appear to have influenced the submitted work.  
39

40  
41  
42 36143  
44 362 **CONTRIBUTORS**

45  
46 363 Conception / design: RJ, ESM, JLT, DAL and SJS.

47  
48 364 Data analysis / acquisition/ interpretation: RJ, CMW, ESM and DAL

49  
50 365 Drafting / revising critically for important content: All authors.

51  
52 366 Final approval: All authors.

53  
54 367 Accountability for study and manuscript: RJ.

55  
56  
57  
58 368

1  
2  
3 369 **DATA SHARING STATEMENT:** The datasets generated during the current study are not  
4  
5 370 publicly available as the project is ongoing and data are not ready for archiving. We will  
6  
7 371 consider reasonable requests for access to the data once the project is complete in 2019.  
8  
9

10 372

## 11 373 **REFERENCES**

- 12  
13  
14 374 1. Strong WB, Malina RM, Blimkie CJ, et al. Evidence based physical activity for school-age  
15  
16 375 youth. *J Pediatr* 2005;**146**(6):732-7
- 17  
18  
19 376 2. Carson V, Hunter S, Kuzik N, et al. Systematic review of sedentary behaviour and health  
20  
21 377 indicators in school-aged children and youth: an update. *Applied physiology,*  
22  
23 378 *nutrition, and metabolism = Physiologie appliquee, nutrition et metabolisme*  
24  
25 379 2016;**41**(6 Suppl 3):S240-65 doi: 10.1139/apnm-2015-0630[published Online First:  
26  
27 380 Epub Date]].
- 28  
29  
30 381 3. Ekelund U, Luan J, Sherar LB, et al. Moderate to vigorous physical activity and sedentary  
31  
32 382 time and cardiometabolic risk factors in children and adolescents. *JAMA*  
33  
34 383 2012;**307**(7):704-12 doi: 10.1001/jama.2012.156[published Online First: Epub Date]].
- 35  
36 384 4. Ekelund U, Steene-Johannessen J, Brown WJ, et al. Does physical activity attenuate, or  
37  
38 385 even eliminate, the detrimental association of sitting time with mortality? A  
39  
40 386 harmonised meta-analysis of data from more than 1 million men and women. *Lancet*  
41  
42 387 2016;**388**(10051):1302-10 doi: 10.1016/S0140-6736(16)30370-1[published Online  
43  
44 388 First: Epub Date]].
- 45  
46  
47 389 5. Department of Health PA, Health Improvement and Protection,. *Start Active, Stay Active:*  
48  
49 390 *A report on physical activity from the four home countries' Chief Medical Officers.*  
50  
51 391 *London, 2011.*
- 52  
53  
54 392 6. Cooper AR, Goodman A, Page AS, et al. Objectively measured physical activity and  
55  
56 393 sedentary time in youth: the International children's accelerometry database (ICAD).  
57  
58  
59  
60

- 1  
2  
3 394 Int J Behav Nutr Phys Act 2015;**12**:113 doi: 10.1186/s12966-015-0274-5[published  
4  
5 395 Online First: Epub Date]].  
6  
7 396 7. Griffiths LJ, Cortina-Borja M, Sera F, et al. How active are our children? Findings from  
8  
9 397 the Millennium Cohort Study. BMJ open 2013;**3**(8):e002893 doi: 10.1136/bmjopen-  
10  
11 398 2013-002893[published Online First: Epub Date]].  
12  
13 399 8. Nader PR, Bradley RH, Houts RM, McRitchie SL, O'Brien M. Moderate-to-vigorous  
14  
15 400 physical activity from ages 9 to 15 years. JAMA 2008;**300**(3):295-305  
16  
17 401 9. Biddle SJ, Pearson N, Ross GM, Braithwaite R. Tracking of sedentary behaviours of  
18  
19 402 young people: A systematic review. Prev Med 2010;**51**:345–51  
20  
21 403 10. Farooq MA, Parkinson KN, Adamson AJ, et al. Timing of the decline in physical activity  
22  
23 404 in childhood and adolescence: Gateshead Millennium Cohort Study. Br J Sports Med  
24  
25 405 2017:1-6 doi: doi:10.1136/bjsports-2016-096933[published Online First: Epub Date]].  
26  
27 406 11. Jago R, Solomon-Moore E, McDonald-Wallis C, Sebire SJ, Thompson JL, Lawlor DA.  
28  
29 407 Change in children's physical activity and sedentary time between Year 1 and Year 4  
30  
31 408 of primary school in the B-PROACTIV cohort. Int J Behav Nutr Phys Act In Press  
32  
33 409 12. Metcalf B, Henley W, Wilkin T. Effectiveness of intervention on physical activity of  
34  
35 410 children: systematic review and meta-analysis of controlled trials with objectively  
36  
37 411 measured outcomes (EarlyBird 54). BMJ 2012;**345**:e5888 doi:  
38  
39 412 10.1136/bmj.e5888[published Online First: Epub Date]].  
40  
41 413 13. van Sluijs EM, McMinn AM, Griffin SJ. Effectiveness of interventions to promote  
42  
43 414 physical activity in children and adolescents: systematic review of controlled trials.  
44  
45 415 BMJ 2007;**335**(7622):703  
46  
47 416 14. Kipping R, Payne C, Lawlor DA. Randomised controlled trial adapting American school  
48  
49 417 obesity prevention to England. Arch Dis Child 2008  
50  
51  
52  
53  
54  
55  
56  
57  
58  
59  
60

- 1  
2  
3 418 15. McGoey T, Root Z, Bruner MW, Law B. Evaluation of physical activity interventions in  
4  
5 419 children via the reach, efficacy/effectiveness, adoption, implementation, and  
6  
7 420 maintenance (RE-AIM) framework: A systematic review of randomized and non-  
8  
9 421 randomized trials. *Prev Med* 2016;**82**:8-19 doi:  
10 422 10.1016/j.ypmed.2015.11.004[published Online First: Epub Date]].  
11  
12  
13  
14 423 16. Arundell L, Fletcher E, Salmon J, Veitch J, Hinkley T. A systematic review of the  
15  
16 424 prevalence of sedentary behavior during the after-school period among children aged  
17  
18 425 5-18 years. *Int J Behav Nutr Phys Act* 2016;**13**:93 doi: 10.1186/s12966-016-0419-  
19  
20 426 1[published Online First: Epub Date]].  
21  
22  
23 427 17. Jago R, Rawlins E, Kipping RR, et al. Lessons learned from the AFLY5 RCT process  
24  
25 428 evaluation: implications for the design of physical activity and nutrition interventions  
26  
27 429 in schools. *BMC Public Health* 2015;**15**:946 doi: 10.1186/s12889-015-2293-  
28  
29 430 1[published Online First: Epub Date]].  
30  
31  
32 431 18. Beets MW, Beighle A, Erwin HE, Huberty JL. After-school program impact on physical  
33  
34 432 activity and fitness: a meta-analysis. *Am J Prev Med* 2009;**36**(6):527-37 doi:  
35  
36 433 10.1016/j.amepre.2009.01.033[published Online First: Epub Date]].  
37  
38  
39 434 19. Beets MW, Okely A, Weaver RG, et al. The theory of expanded, extended, and enhanced  
40  
41 435 opportunities for youth physical activity promotion. *Int J Behav Nutr Phys Act*  
42  
43 436 2016;**13**(1):120 doi: 10.1186/s12966-016-0442-2[published Online First: Epub Date]].  
44  
45  
46 437 20. Beets MW, Weaver RG, Turner-McGrievy G, et al. Physical activity outcomes in  
47  
48 438 afterschool programs: A group randomized controlled trial. *Prev Med* 2016;**90**:207-15  
49  
50 439 doi: 10.1016/j.ypmed.2016.07.002[published Online First: Epub Date]].  
51  
52  
53 440 21. Weaver RG, Beets MW, Huberty J, Freedman D, Turner-McGrievy G, Ward D. Physical  
54  
55 441 activity opportunities in afterschool programs. *Health promotion practice*

- 1  
2  
3 442 2015;**16**(3):371-82 doi: 10.1177/1524839914567740[published Online First: Epub  
4  
5 443 Date]].  
6  
7 444 22. Jago R, Sebire SJ, Wood L, et al. Associations between objectively assessed child and  
8  
9 445 parental physical activity: a cross-sectional study of families with 5-6 year old  
10  
11 446 children. BMC Public Health 2014;**14**:655 doi: 10.1186/1471-2458-14-655[published  
12  
13 447 Online First: Epub Date]].  
14  
15  
16 448 23. Jago R, Thompson JL, Sebire SJ, et al. Cross-sectional associations between the screen-  
17  
18 449 time of parents and young children: differences by parent and child gender and day of  
19  
20 450 the week. Int J Behav Nutr Phys Act 2014;**11**:54 doi: 10.1186/1479-5868-11-  
21  
22 451 54[published Online First: Epub Date]].  
23  
24  
25 452 24. Cole TJ, Bellizzi MC, Flegal KM, Dietz WH. Establishing a standard definition for child  
26  
27 453 overweight and obesity worldwide: international survey. BMJ 2000;**320**(7244):1240-3  
28  
29  
30 454 25. Cole TJ, Freeman JV, Preece MA. Body mass index reference curves for the UK, 1990.  
31  
32 455 Arch Dis Child 1995;**73**(1):25-9  
33  
34 456 26. Evenson KR, Catellier DJ, Gill K, Ondrak KS, McMurray RG. Calibration of two  
35  
36 457 objective measures of physical activity for children. Journal of sports sciences  
37  
38 458 2008;**26**(14):1557-65  
39  
40  
41 459 27. Rubin DB. Multiple imputation after 18+ years. Journal of the American Statistical  
42  
43 460 Association 1996;**91**(434):473-789  
44  
45  
46 461 28. Cabinet Office. Childhood obesity: a plan for action. In: Prime Minister's Office DS, ed.  
47  
48 462 London: Prime Minister's Office, 10 Downing Street, 2017.  
49  
50 463 29. Davies B, Wood L, Banfield K, Edwards MJ, Jago R. The provision of active after-school  
51  
52 464 clubs for children in English primary schools: implications for increasing children's  
53  
54 465 physical activity. Open Journal of Preventive Medicine 2014;**4**:598-605 doi:  
55  
56 466 <http://dx.doi.org/10.4236/ojpm.2014.47069>[published Online First: Epub Date]].  
57  
58  
59  
60

1  
2  
3  
4  
5  
6  
7  
8  
9  
10  
11  
12  
13  
14  
15  
16  
17  
18  
19  
20  
21  
22  
23  
24  
25  
26  
27  
28  
29  
30  
31  
32  
33  
34  
35  
36  
37  
38  
39  
40  
41  
42  
43  
44  
45  
46  
47  
48  
49  
50  
51  
52  
53  
54  
55  
56  
57  
58  
59  
60

467 **Figure 1 Predicted time spent in sedentary behaviour by type of activity using multiple**  
468 **imputation (N=1223)\***

469 **Figure 2 Predicted time spent in moderate-to-vigorous physical activity by type of**  
470 **activity using multiple imputation (N=1223)\***

For peer review only

1  
2  
3  
4  
5  
6  
7  
8  
9  
10  
11  
12  
13  
14  
15  
16  
17  
18  
19  
20  
21  
22  
23  
24  
25  
26  
27  
28  
29  
30  
31  
32  
33  
34  
35  
36  
37  
38  
39  
40  
41  
42  
43  
44  
45  
46  
47  
48  
49  
50  
51  
52  
53  
54  
55  
56  
57  
58  
59  
60

For peer review only



Figure 1 Predicted time spent in sedentary behaviour by type of activity using multiple imputation (N=1223)\*

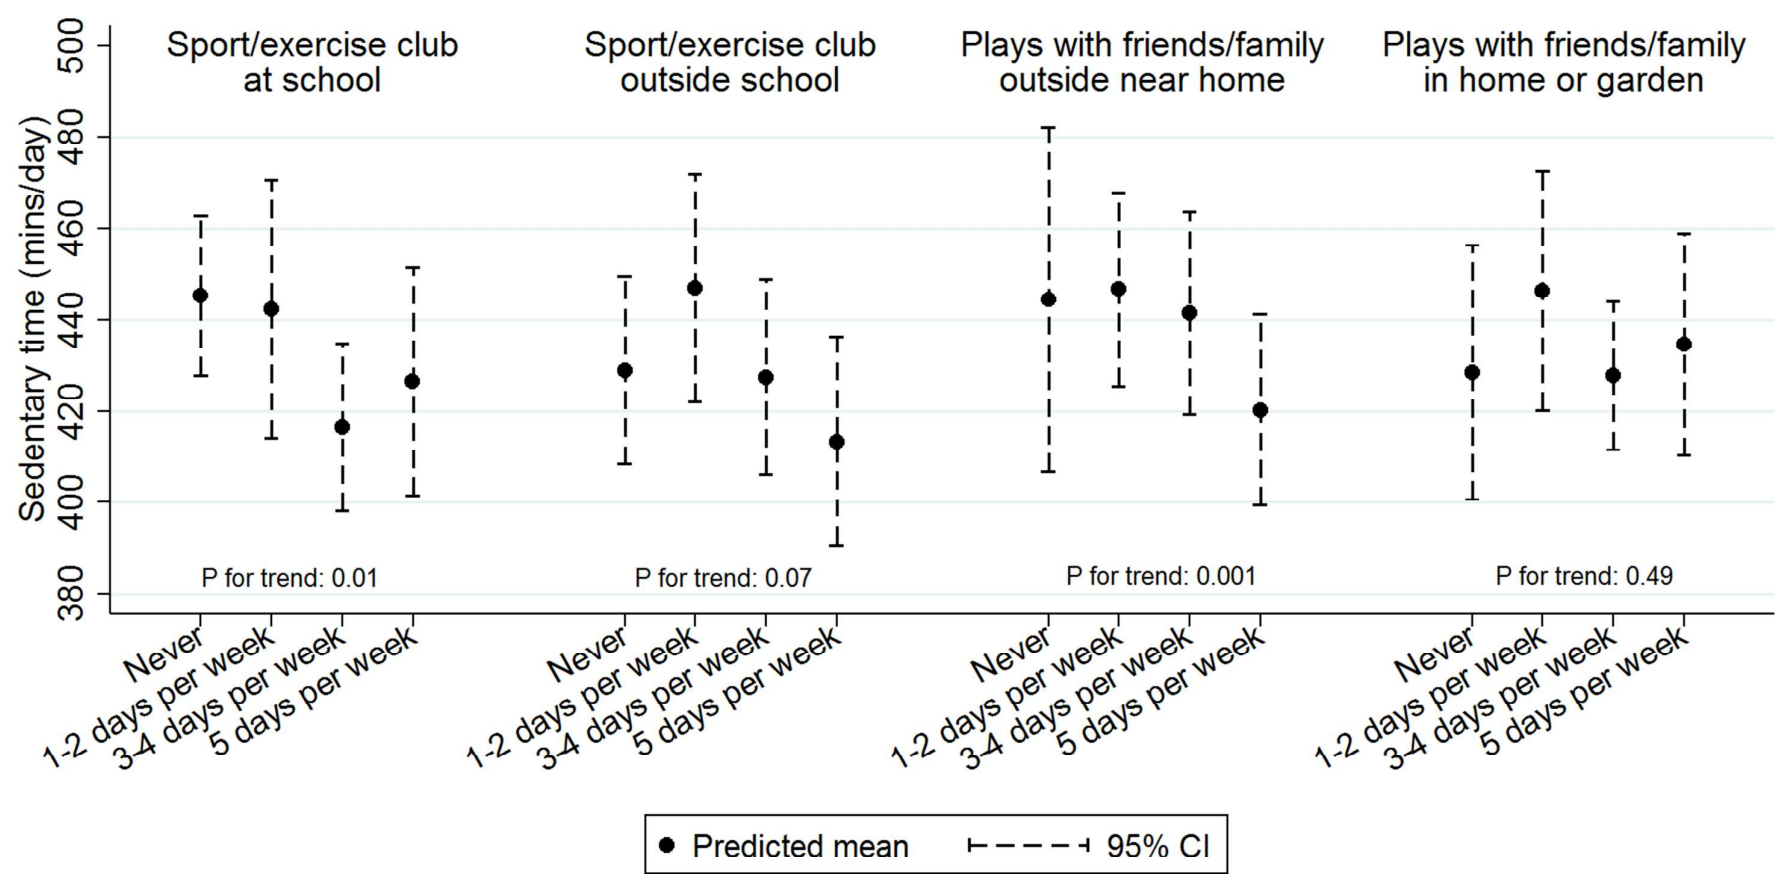

\* Predictions were obtained from fully adjusted regression models (Model 2) including all Year 4 children (boys and girls) and are for a 9-year old boy with a BMI z-score of 0 and IMD score of 16. Predicted sedentary time for girls was approximately 15-17 mins/day higher (same additive effect across all categories of the exposure variable) depending on the regression model

Figure 1 Predicted time spent in moderate-to-vigorous physical activity by type of activity using multiple imputation (N=1223)\*

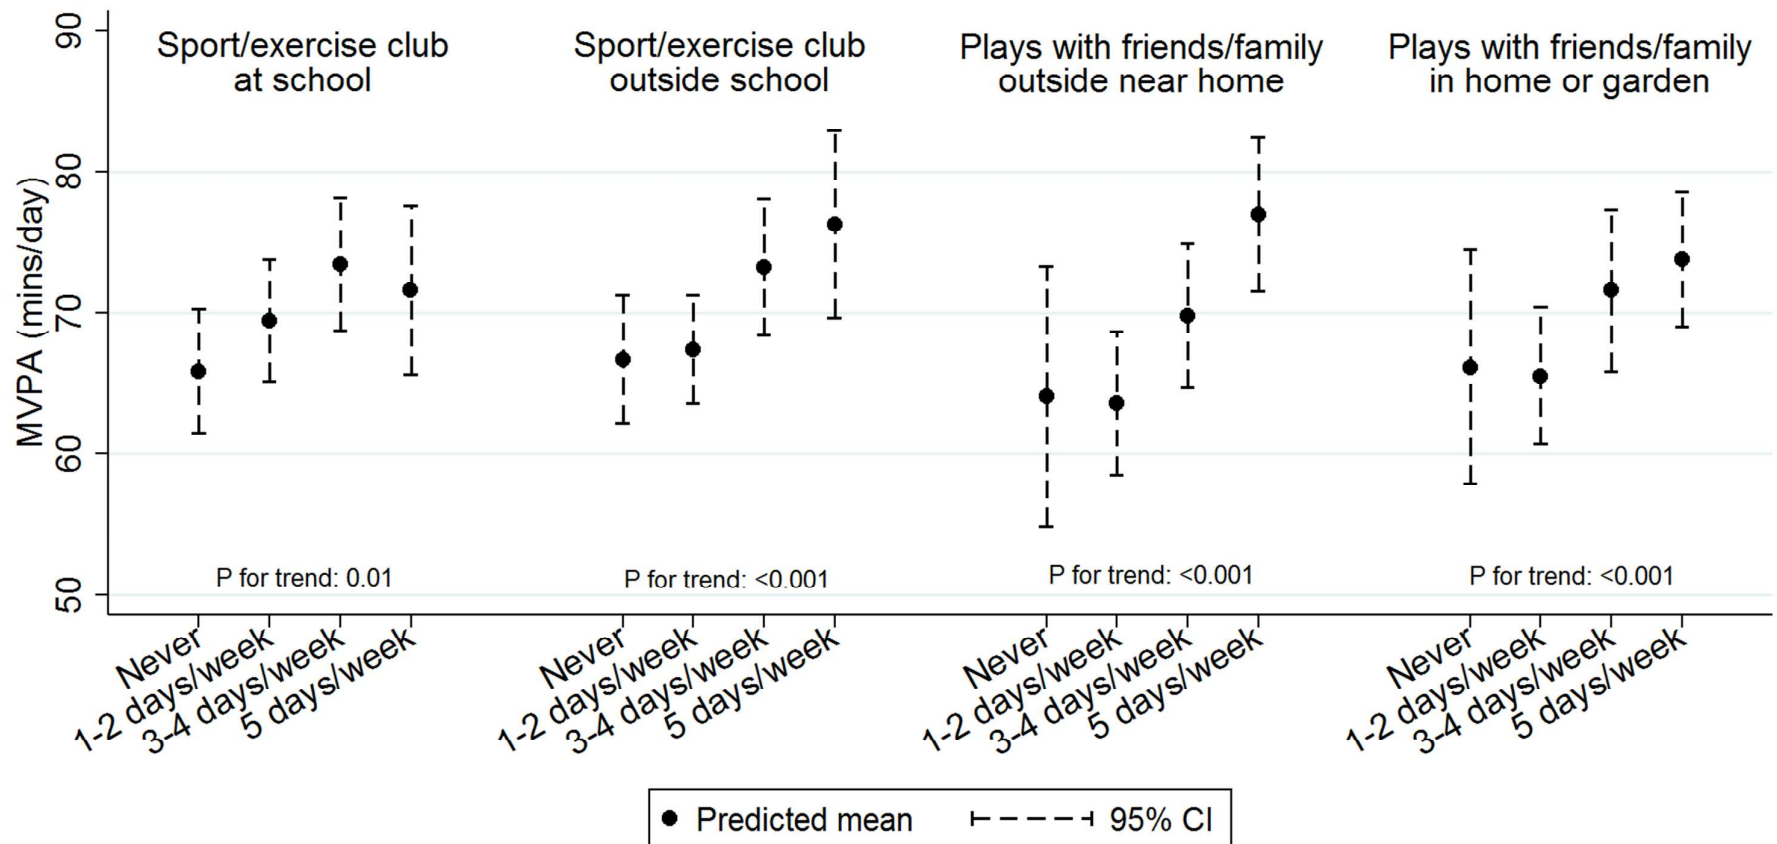

\* Predictions were obtained from fully adjusted regression models (Model 2) including all Year 4 children (boys and girls) and are for a 9-year old boy with a BMI z-score of 0 and IMD score of 16. Predicted time spent in moderate-to-vigorous physical activity for girls was approximately 13 mins/day lower (same additive effect across all categories of the exposure variable)

Table S1 Frequencies of sport/exercise club attendance and play outside and inside the home and mean activity score by gender in the observed data

|                                                                                  |               | Boys<br>N (%) |             | Girls<br>N (%) |             | Chi-squared p-value for<br>association  |
|----------------------------------------------------------------------------------|---------------|---------------|-------------|----------------|-------------|-----------------------------------------|
| <b>Frequency child<br/>attends<br/>sport/exercise club<br/>at school</b>         | Never         | 144 (25.9)    |             | 194 (29.4)     |             | <0.001                                  |
|                                                                                  | 1-2 days/week | 235 (42.3)    |             | 318 (48.2)     |             |                                         |
|                                                                                  | 3-4 days/week | 90 (16.2)     |             | 106 (16.1)     |             |                                         |
|                                                                                  | 5 days/week   | 86 (15.5)     |             | 42 (6.4)       |             |                                         |
|                                                                                  |               |               |             |                |             |                                         |
| <b>Frequency child<br/>attends<br/>sport/exercise club<br/>outside of school</b> | Never         | 85 (15.3)     |             | 165 (25.0)     |             | <0.001                                  |
|                                                                                  | 1-2 days/week | 289 (52.1)    |             | 321 (48.7)     |             |                                         |
|                                                                                  | 3-4 days/week | 121 (21.8)    |             | 132 (20.0)     |             |                                         |
|                                                                                  | 5 days/week   | 60 (10.8)     |             | 41 (6.2)       |             |                                         |
|                                                                                  |               |               |             |                |             |                                         |
| <b>Frequency child<br/>plays with<br/>friends/family<br/>outside near home</b>   | Never         | 36 (6.6)      |             | 40 (6.1)       |             | 0.14                                    |
|                                                                                  | 1-2 days/week | 187 (34.1)    |             | 219 (33.4)     |             |                                         |
|                                                                                  | 3-4 days/week | 142 (25.9)    |             | 207 (31.6)     |             |                                         |
|                                                                                  | 5 days/week   | 184 (33.5)    |             | 190 (29.0)     |             |                                         |
|                                                                                  |               |               |             |                |             |                                         |
| <b>Frequency child<br/>plays with<br/>friends/family in<br/>home/garden</b>      | Never         | 53 (9.7)      |             | 62 (9.5)       |             | 0.76                                    |
|                                                                                  | 1-2 days/week | 184 (33.7)    |             | 230 (35.2)     |             |                                         |
|                                                                                  | 3-4 days/week | 142 (26.0)    |             | 179 (27.4)     |             |                                         |
|                                                                                  | 5 days/week   | 167 (30.6)    |             | 182 (27.9)     |             |                                         |
|                                                                                  |               |               |             |                |             |                                         |
|                                                                                  |               | Boys          |             | Girls          |             | T-test p-value for gender<br>difference |
|                                                                                  |               | N             | Mean (SD)   | N              | Mean (SD)   |                                         |
| <b>Activity frequency score</b>                                                  |               | 542           | 6.15 (2.42) | 651            | 5.65 (2.16) | <0.001                                  |

|                                                                      |               | Age (years) |         | BMI z score |         | IMD score     |         |
|----------------------------------------------------------------------|---------------|-------------|---------|-------------|---------|---------------|---------|
|                                                                      |               | Mean (SD)   | N       | Mean (SD)   | N       | Mean (SD)     | N       |
| <b>Frequency child attends sport/exercise club at school</b>         | Never         | 9.03 (0.38) | 1215    | 0.43 (1.14) | 1202    | 17.30 (15.04) | 1197    |
|                                                                      | 1-2 days/week | 9.05 (0.43) |         | 0.35 (1.05) |         |               |         |
|                                                                      | 3-4 days/week | 9.00 (0.45) |         | 0.29 (1.02) |         |               |         |
|                                                                      | 5 days/week   | 8.99 (0.39) |         | 0.27 (1.13) |         |               |         |
|                                                                      |               |             |         |             |         |               |         |
| P-value for difference between categories*                           |               | 0.31        |         | 0.36        |         | 0.07          |         |
| <b>Frequency child attends sport/exercise club outside of school</b> | Never         | 9.01 (0.40) | 1214    | 0.47 (1.07) | 1201    | 20.03 (16.06) | 1196    |
|                                                                      | 1-2 days/week | 9.01 (0.43) |         | 0.37 (1.09) |         |               |         |
|                                                                      | 3-4 days/week | 9.05 (0.41) |         | 0.23 (1.07) |         |               |         |
|                                                                      | 5 days/week   | 9.12 (0.39) |         | 0.30 (1.06) |         |               |         |
|                                                                      |               |             |         |             |         |               |         |
| P-value for difference between categories*                           |               | 0.05        |         | 0.09        |         | <0.001        |         |
| <b>Frequency child plays with friends/family outside near home</b>   | Never         | 8.96 (0.47) | 1205    | 0.48 (1.24) | 1192    | 17.60 (16.02) | 1187    |
|                                                                      | 1-2 days/week | 9.01 (0.42) |         | 0.31 (1.06) |         |               |         |
|                                                                      | 3-4 days/week | 9.05 (0.41) |         | 0.39 (1.07) |         |               |         |
|                                                                      | 5 days/week   | 9.05 (0.40) |         | 0.33 (1.08) |         |               |         |
|                                                                      |               |             |         |             |         |               |         |
| P-value for difference between categories*                           |               | 0.23        |         | 0.58        |         | 0.01          |         |
| <b>Frequency child plays with friends/family in home/garden</b>      | Never         | 8.97 (0.38) | 1199    | 0.50 (1.11) | 1186    | 18.54 (15.94) | 1181    |
|                                                                      | 1-2 days/week | 9.02 (0.45) |         | 0.29 (1.09) |         |               |         |
|                                                                      | 3-4 days/week | 9.06 (0.41) |         | 0.40 (1.07) |         |               |         |
|                                                                      | 5 days/week   | 9.03 (0.39) |         | 0.32 (1.07) |         |               |         |
|                                                                      |               |             |         |             |         |               |         |
| P-value for difference between categories*                           |               | 0.31        |         | 0.23        |         | 0.02          |         |
|                                                                      |               | Correlation | P-value | Correlation | P-value | Correlation   | P-value |
| <b>Activity frequency score</b>                                      |               | 0.04        | 0.13    | -0.05       | 0.07    | -0.07         | 0.02    |

1  
2  
3  
4  
5  
6  
7  
8  
9  
10  
11  
12  
13  
14  
15  
16  
17  
18  
19  
20  
21  
22  
23  
24  
25  
26  
27  
28  
29  
30  
31  
32  
33  
34  
35  
36  
37  
38  
39  
40  
41  
42  
43  
44  
45  
46  
47  
48  
49

**Table S2 Child characteristics by frequencies of sport/exercise club attendance and play outside and inside the home and activity score in the observed data**

For peer review only

Table S3 Pairwise comparisons of children's activity attendance frequencies in the multiple imputation data (N=1223)\*

|                                                               |                     | Frequency child attends sport/exercise club at school (%) |                     | Frequency child attends sport/exercise club outside of school (%) |                     | Frequency child plays with friends/family outside near home (%) |                     | Frequency child plays with friends/family in home/garden (%) |                     |
|---------------------------------------------------------------|---------------------|-----------------------------------------------------------|---------------------|-------------------------------------------------------------------|---------------------|-----------------------------------------------------------------|---------------------|--------------------------------------------------------------|---------------------|
|                                                               |                     | Up to 2 days/week                                         | 3 or more days/week | Up to 2 days/week                                                 | 3 or more days/week | Up to 2 days/week                                               | 3 or more days/week | Up to 2 days/week                                            | 3 or more days/week |
| Frequency child attends sport/exercise club at school         | Up to 2 days/week   |                                                           |                     | 76.3                                                              | 23.7                | 42.7                                                            | 57.3                | 47.3                                                         | 52.7                |
|                                                               | 3 or more days/week |                                                           |                     | 55.8                                                              | 44.2                | 33.2                                                            | 66.8                | 36.0                                                         | 64.0                |
| P for association                                             |                     |                                                           |                     | <0.001                                                            |                     | 0.003                                                           |                     | 0.001                                                        |                     |
| Frequency child attends sport/exercise club outside of school | Up to 2 days/week   | 79.0                                                      | 21.0                |                                                                   |                     | 40.2                                                            | 59.8                | 46.8                                                         | 53.2                |
|                                                               | 3 or more days/week | 59.7                                                      | 40.3                |                                                                   |                     | 40.0                                                            | 60.0                | 38.2                                                         | 61.8                |
| P for association                                             |                     | <0.001                                                    |                     |                                                                   |                     | 0.94                                                            |                     | 0.006                                                        |                     |
| Frequency child plays with friends/family outside near home   | Up to 2 days/week   | 78.0                                                      | 22.0                | 71.0                                                              | 29.0                |                                                                 |                     | 65.1                                                         | 34.9                |
|                                                               | 3 or more days/week | 70.3                                                      | 29.7                | 70.8                                                              | 29.2                |                                                                 |                     | 30.3                                                         | 69.7                |
| P for association                                             |                     | 0.003                                                     |                     | 0.94                                                              |                     |                                                                 |                     | <0.001                                                       |                     |
| Frequency child plays with friends/family in home/garden      | Up to 2 days/week   | 78.3                                                      | 21.7                | 74.9                                                              | 25.1                | 59.0                                                            | 41.0                |                                                              |                     |
|                                                               | 3 or more days/week | 69.4                                                      | 30.6                | 67.6                                                              | 32.4                | 25.2                                                            | 74.8                |                                                              |                     |
| P for association                                             |                     | 0.001                                                     |                     | 0.006                                                             |                     | <0.001                                                          |                     |                                                              |                     |
| <b>Total</b>                                                  |                     | <b>73.4</b>                                               | <b>26.6</b>         | <b>70.8</b>                                                       | <b>29.2</b>         | <b>40.2</b>                                                     | <b>59.8</b>         | <b>44.3</b>                                                  | <b>55.7</b>         |

\* Percentages presented are the proportions of children in each row that belong to each of the categories of child activity variables listed along the top of the table.

**Table S4 Mean difference in the children's average sedentary minutes per day associated with different activities for those with complete data (N=987)\***

| Exposure                                                      |               | Sedentary time (minutes/day): mean difference (95% confidence interval) |                |               |               |                |                | P for gender interaction |
|---------------------------------------------------------------|---------------|-------------------------------------------------------------------------|----------------|---------------|---------------|----------------|----------------|--------------------------|
|                                                               |               | All (N=987)                                                             |                | Boys (N=439)  |               | Girls (N=548)  |                |                          |
|                                                               |               | Model 1                                                                 | Model 2        | Model 1       | Model 2       | Model 1        | Model 2        |                          |
| Frequency child attends sport/exercise club at school         | Never (ref)   | 0                                                                       | 0              | 0             | 0             | 0              | 0              | 0.45                     |
|                                                               | 1-2 days/week | -0.29                                                                   | 0.0            | 14.7          | 15.9          | -11.4          | -11.9          |                          |
|                                                               | 3-4 days/week | (-21.3, 20.7)                                                           | (-21.2, 21.3)  | (-10.1, 39.5) | (-9.2, 41.0)  | (-39.7, 16.8)  | (-41.1, 17.3)  |                          |
|                                                               | 5 days/week   | -26.3                                                                   | -24.1          | -13.8         | -9.9          | -36.0          | -35.4          |                          |
|                                                               |               | (-40.8, -11.8)                                                          | (-37.8, -10.4) | (-31.5, 4.0)  | (-29.3, 9.4)  | (-59.5, -12.4) | (-59.0, -11.7) |                          |
|                                                               |               | -16.0                                                                   | -16.1          | -7.1          | -3.1          | -22.0          | -29.8          |                          |
|                                                               |               | (-35.3, 3.3)                                                            | (-34.4, 2.3)   | (-29.7, 15.4) | (-26.9, 20.6) | (-54.6, 10.7)  | (-69.2, 9.66)  |                          |
| P for trend                                                   |               | 0.01                                                                    | 0.009          | 0.19          | 0.40          | 0.02           | 0.02           |                          |
| Frequency child attends sport/exercise club outside of school | Never (ref)   | 0                                                                       | 0              | 0             | 0             | 0              | 0              | 0.73                     |
|                                                               | 1-2 days/week | 16.1                                                                    | 20.0           | 24.6          | 31.2          | 10.8           | 12.9           |                          |
|                                                               | 3-4 days/week | (-7.5, 39.7)                                                            | (-7.0, 47.0)   | (-3.4, 52.7)  | (0.6, 61.8)   | (-19.3, 41.0)  | (-20.0, 45.9)  |                          |
|                                                               | 5 days/week   | -6.6                                                                    | 0.1            | -3.2          | 5.6           | -7.6           | -2.0           |                          |
|                                                               |               | (-23.2, 10.1)                                                           | (-19.6, 19.8)  | (-28.8, 22.3) | (-17.7, 28.8) | (-26.3, 11.1)  | (-26.7, 22.6)  |                          |
|                                                               |               | -18.4                                                                   | -13.8          | -13.0         | -5.9          | -20.8          | -18.2          |                          |
|                                                               |               | (-36.5, -0.2)                                                           | (-33.8, 6.2)   | (-36.3, 10.4) | (-28.8, 16.9) | (-46.0, 4.3)   | (-46.4, 10.0)  |                          |
| P for trend                                                   |               | 0.009                                                                   | 0.05           | 0.02          | 0.03          | 0.08           | 0.28           |                          |
| Frequency child plays with friends/family outside near home   | Never (ref)   | 0                                                                       | 0              | 0             | 0             | 0              | 0              | 0.68                     |
|                                                               | 1-2 days/week | 4.5                                                                     | 6.0            | 16.3          | 20.2          | -5.7           | -7.1           |                          |
|                                                               | 3-4 days/week | (-26.7, 35.7)                                                           | (-27.5, 39.5)  | (-13.4, 45.9) | (-10.1, 50.4) | (-55.7, 44.3)  | (-59.0, 44.9)  |                          |
|                                                               | 5 days/week   | -2.5                                                                    | -0.6           | 8.3           | 13.0          | -11.9          | -13.2          |                          |
|                                                               |               | (-30.1, 25.0)                                                           | (-31.6, 30.3)  | (-23.1, 39.7) | (-19.4, 45.4) | (-68.1, 44.3)  | (-71.3, 44.9)  |                          |
|                                                               |               | -21.6                                                                   | -21.9          | -9.4          | -6.4          | -32.3          | -36.4          |                          |
|                                                               |               | (-49.0, 5.7)                                                            | (-50.4, 6.6)   | (-35.4, 16.6) | (-32.8, 20.0) | (-78.9, 14.2)  | (-86.0, 13.1)  |                          |
| P for trend                                                   |               | <0.001                                                                  | <0.001         | 0.08          | 0.08          | 0.009          | 0.01           |                          |
| Frequency child plays with friends/family in home/garden      | Never (ref)   | 0                                                                       | 0              | 0             | 0             | 0              | 0              | 0.86                     |
|                                                               | 1-2 days/week | 18.2                                                                    | 18.8           | 19.2          | 19.5          | 17.2           | 17.6           |                          |
|                                                               | 3-4 days/week | (-12.4, 48.8)                                                           | (-12.4, 50.0)  | (-13.8, 52.2) | (-13.7, 52.8) | (-25.4, 59.9)  | (-25.4, 60.6)  |                          |
|                                                               | 5 days/week   | -4.5                                                                    | -1.9           | 2.8           | 4.6           | -10.1          | -7.5           |                          |
|                                                               |               | (-27.3, 18.2)                                                           | (-26.7, 22.9)  | (-16.3, 21.9) | (-15.7, 25.0) | (-47.3, 27.0)  | (-47.1, 32.1)  |                          |
|                                                               |               | 3.8                                                                     | 3.6            | 10.8          | 11.6          | -2.2           | -3.5           |                          |
|                                                               |               | (-24.6, 32.2)                                                           | (-24.6, 31.8)  | (-27.1, 48.8) | (-27.0, 50.2) | (-43.0, 38.6)  | (-45.3, 38.3)  |                          |
| P for trend                                                   |               | 0.24                                                                    | 0.22           | 0.85          | 0.89          | 0.25           | 0.24           |                          |
| Activity score (per unit)                                     |               | -4.9                                                                    | -4.7           | -3.5          | -2.9          | -6.3           | -6.6           | 0.28                     |
|                                                               |               | (-7.2, -2.7)                                                            | (-6.9, -2.4)   | (-6.6, -0.4)  | (-6.0, 0.2)   | (-10.7, -2.0)  | (-11.2, -1.9)  |                          |

1  
2 \* Model 1 is adjusted for age and gender; Model 2 is additionally adjusted for BMI and IMD score  
3  
4  
5  
6  
7  
8  
9  
10  
11  
12  
13  
14  
15  
16  
17  
18  
19  
20  
21  
22  
23  
24  
25  
26  
27  
28  
29  
30  
31  
32  
33  
34  
35  
36  
37  
38  
39  
40  
41  
42  
43  
44  
45  
46  
47  
48  
49

For peer review only



**Table S5 Mean difference in the children's average MVPA minutes per day associated with different activities for those with complete data (N=987)\***

| Exposure                                                      | Moderate-to-vigorous physical activity (minutes/day): mean difference (95% confidence interval) |              |              |              |               |              |              | P for gender interaction |
|---------------------------------------------------------------|-------------------------------------------------------------------------------------------------|--------------|--------------|--------------|---------------|--------------|--------------|--------------------------|
|                                                               | All (N=987)                                                                                     |              | Boys (N=439) |              | Girls (N=548) |              |              |                          |
|                                                               | Model 1                                                                                         | Model 2      | Model 1      | Model 2      | Model 1       | Model 2      |              |                          |
| Frequency child attends sport/exercise club at school         | Never (ref)                                                                                     | 0            | 0            | 0            | 0             | 0            | 0            | 0.64                     |
|                                                               | 1-2 days/week                                                                                   | 3.2          | 3.1          | 3.3          | 2.7           | 3.1          | 3.1          |                          |
|                                                               |                                                                                                 | (-0.4, 6.8)  | (-0.5, 6.6)  | (-3.3, 9.8)  | (-3.7, 9.2)   | (-0.5, 6.8)  | (-0.6, 6.8)  |                          |
|                                                               | 3-4 days/week                                                                                   | 6.7          | 6.4          | 8.0          | 7.3           | 5.7          | 5.6          |                          |
|                                                               |                                                                                                 | (1.7, 11.8)  | (1.4, 11.4)  | (1.0, 15.1)  | (0.1, 14.4)   | (0.6, 10.7)  | (0.5, 10.7)  |                          |
|                                                               | 5 days/week                                                                                     | 5.3          | 5.1          | 6.6          | 5.8           | 3.2          | 3.1          |                          |
|                                                               |                                                                                                 | (-1.3, 11.9) | (-1.5, 11.8) | (-1.4, 14.6) | (-2.2, 13.8)  | (-5.0, 11.5) | (-5.5, 11.6) |                          |
| P for trend                                                   |                                                                                                 | 0.02         | 0.03         | 0.02         | 0.05          | 0.08         | 0.10         |                          |
| Frequency child attends sport/exercise club outside of school | Never (ref)                                                                                     | 0            | 0            | 0            | 0             | 0            | 0            | 0.53                     |
|                                                               | 1-2 days/week                                                                                   | 1.8          | 1.5          | 4.3          | 3.6           | 0.4          | 0.4          |                          |
|                                                               |                                                                                                 | (-1.9, 5.5)  | (-2.4, 5.4)  | (-3.2, 11.9) | (-4.4, 11.7)  | (-3.5, 4.3)  | (-3.5, 4.4)  |                          |
|                                                               | 3-4 days/week                                                                                   | 7.3          | 6.7          | 10.5         | 9.0           | 5.3          | 5.5          |                          |
|                                                               |                                                                                                 | (3.0, 11.5)  | (2.4, 11.0)  | (2.8, 18.2)  | (1.4, 16.6)   | (0.6, 10.0)  | (0.9, 10.0)  |                          |
|                                                               | 5 days/week                                                                                     | 10.5         | 10.1         | 14.3         | 13.4          | 7.3          | 7.3          |                          |
|                                                               |                                                                                                 | (4.6, 16.5)  | (3.9, 16.2)  | (6.3, 22.3)  | (4.8, 22.0)   | (-0.8, 15.3) | (-0.6, 15.2) |                          |
| P for trend                                                   |                                                                                                 | <0.001       | <0.001       | <0.001       | <0.001        | 0.01         | 0.008        |                          |
| Frequency child plays with friends/family outside near home   | Never (ref)                                                                                     | 0            | 0            | 0            | 0             | 0            | 0            | 0.32                     |
|                                                               | 1-2 days/week                                                                                   | 0.7          | 0.4          | 1.2          | 0.5           | 0.4          | 0.3          |                          |
|                                                               |                                                                                                 | (-4.1, 5.5)  | (-4.3, 5.0)  | (-7.4, 9.7)  | (-8.1, 9.1)   | (-6.0, 6.9)  | (-6.3, 6.9)  |                          |
|                                                               | 3-4 days/week                                                                                   | 5.2          | 4.9          | 6.7          | 6.0           | 4.0          | 3.9          |                          |
|                                                               |                                                                                                 | (-0.8, 11.2) | (-1.0, 10.7) | (-3.5, 16.9) | (-4.0, 15.9)  | (-3.6, 11.7) | (-3.8, 11.7) |                          |
|                                                               | 5 days/week                                                                                     | 9.9          | 9.7          | 13.8         | 13.3          | 6.5          | 6.4          |                          |
|                                                               |                                                                                                 | (4.4, 15.4)  | (4.2, 15.1)  | (4.6, 23.0)  | (4.0, 22.5)   | (-0.5, 13.5) | (-0.7, 13.6) |                          |
| P for trend                                                   |                                                                                                 | <0.001       | <0.001       | <0.001       | <0.001        | 0.004        | 0.005        |                          |
| Frequency child plays with friends/family in home/garden      | Never (ref)                                                                                     | 0            | 0            | 0            | 0             | 0            | 0            | 0.40                     |
|                                                               | 1-2 days/week                                                                                   | 2.5          | 2.2          | 0.6          | 0.4           | 4.1          | 4.0          |                          |
|                                                               |                                                                                                 | (-0.9, 6.0)  | (-1.4, 5.8)  | (-7.0, 8.2)  | (-7.4, 8.2)   | (-0.9, 9.2)  | (-1.1, 9.1)  |                          |
|                                                               | 3-4 days/week                                                                                   | 6.6          | 6.3          | 6.7          | 6.9           | 6.5          | 6.4          |                          |
|                                                               |                                                                                                 | (2.4, 10.7)  | (1.8, 10.8)  | (-1.8, 15.3) | (-1.9, 15.7)  | (0.4, 12.6)  | (0.1, 12.7)  |                          |
|                                                               | 5 days/week                                                                                     | 8.6          | 8.4          | 9.3          | 9.1           | 7.9          | 7.8          |                          |
|                                                               |                                                                                                 | (4.6, 12.5)  | (4.3, 12.6)  | (1.6, 16.9)  | (1.0, 17.2)   | (2.5, 13.3)  | (2.4, 13.3)  |                          |
| P for trend                                                   |                                                                                                 | <0.001       | <0.001       | 0.001        | 0.001         | 0.003        | 0.003        |                          |
| Activity score (per unit)                                     |                                                                                                 | 2.13         | 2.09         | 2.58         | 2.49          | 1.67         | 1.66         | 0.07                     |
|                                                               |                                                                                                 | (1.44, 2.82) | (1.37, 2.81) | (1.73, 3.43) | (1.55, 3.42)  | (0.86, 2.47) | (0.85, 2.48) |                          |

| Exposure                                                      | Meeting government guideline: odds ratio (95% confidence interval) |                      |                      |                      |                      |                      |                      | P for gender interaction |
|---------------------------------------------------------------|--------------------------------------------------------------------|----------------------|----------------------|----------------------|----------------------|----------------------|----------------------|--------------------------|
|                                                               | All (N=987)                                                        |                      | Boys (N=439)         |                      | Girls (N=548)        |                      |                      |                          |
|                                                               | Model 1                                                            | Model 2              | Model 1              | Model 2              | Model 1              | Model 2              |                      |                          |
| Frequency child attends sport/exercise club at school         | Never (ref)                                                        | 1                    | 1                    | 1                    | 1                    | 1                    | 1                    | 0.25                     |
|                                                               | 1-2 days/week                                                      | 1.27<br>(0.94, 1.71) | 1.25<br>(0.93, 1.69) | 0.97<br>(0.58, 1.63) | 0.93<br>(0.55, 1.55) | 1.57<br>(1.09, 2.25) | 1.57<br>(1.09, 2.26) |                          |
|                                                               | 3-4 days/week                                                      | 1.77<br>(1.05, 2.97) | 1.72<br>(1.03, 2.87) | 1.97<br>(0.93, 4.18) | 1.86<br>(0.88, 3.95) | 1.65<br>(0.93, 2.91) | 1.66<br>(0.94, 2.92) |                          |
|                                                               | 5 days/week                                                        | 1.63<br>(0.96, 2.77) | 1.61<br>(0.95, 2.74) | 1.49<br>(0.75, 2.96) | 1.40<br>(0.70, 2.77) | 1.73<br>(0.78, 3.85) | 1.76<br>(0.78, 3.96) |                          |
|                                                               | P for trend                                                        | 0.03                 | 0.03                 | 0.06                 | 0.10                 | 0.07                 | 0.07                 |                          |
| Frequency child attends sport/exercise club outside of school | Never (ref)                                                        | 1                    | 1                    | 1                    | 1                    | 1                    | 1                    | 0.66                     |
|                                                               | 1-2 days/week                                                      | 1.32<br>(0.91, 1.91) | 1.29<br>(0.88, 1.88) | 1.53<br>(0.89, 2.62) | 1.46<br>(0.83, 2.57) | 1.19<br>(0.72, 1.97) | 1.21<br>(0.74, 1.99) |                          |
|                                                               | 3-4 days/week                                                      | 2.06<br>(1.38, 3.07) | 1.97<br>(1.32, 2.95) | 2.56<br>(1.32, 4.98) | 2.28<br>(1.18, 4.40) | 1.77<br>(1.05, 2.98) | 1.81<br>(1.09, 3.03) |                          |
|                                                               | 5 days/week                                                        | 2.89<br>(1.76, 4.73) | 2.80<br>(1.69, 4.63) | 4.13<br>(1.97, 8.68) | 3.92<br>(1.82, 8.44) | 2.09<br>(1.06, 4.12) | 2.14<br>(1.10, 4.18) |                          |
|                                                               | P for trend                                                        | <0.001               | <0.001               | <0.001               | <0.001               | 0.006                | 0.004                |                          |
| Frequency child plays with friends/family                     | Never (ref)                                                        | 1                    | 1                    | 1                    | 1                    | 1                    | 1                    | 0.89                     |
|                                                               | 1-2 days/week                                                      | 1.16<br>(0.70, 1.92) | 1.13<br>(0.70, 1.85) | 1.03<br>(0.46, 2.29) | 0.98<br>(0.43, 2.22) | 1.40<br>(0.59, 3.30) | 1.41<br>(0.60, 3.29) |                          |

\* MVPA Moderate-to-vigorous physical activity; Model 1 is adjusted for age and gender; Model 2 is additionally adjusted for BMI and IMD score

**Table S6 Odds ratios for achieving 60 minutes of MVPA per day associated with different activities for those with complete data (N=987)\***

|                                                          |               |                      |                      |                      |                      |                      |                      |      |
|----------------------------------------------------------|---------------|----------------------|----------------------|----------------------|----------------------|----------------------|----------------------|------|
| outside near home                                        | 3-4 days/week | 1.94<br>(1.12, 3.35) | 1.89<br>(1.12, 3.21) | 1.59<br>(0.68, 3.75) | 1.53<br>(0.65, 3.62) | 2.43<br>(0.92, 6.45) | 2.46<br>(0.94, 6.42) |      |
|                                                          | 5 days/week   | 2.14<br>(1.26, 3.65) | 2.12<br>(1.26, 3.57) | 2.01<br>(0.88, 4.63) | 1.97<br>(0.85, 4.54) | 2.45<br>(0.95, 6.36) | 2.49<br>(0.97, 6.40) |      |
| P for trend                                              |               | <0.001               | <0.001               | 0.007                | 0.005                | 0.007                | 0.006                |      |
| Frequency child plays with friends/family in home/garden | Never (ref)   | 1                    | 1                    | 1                    | 1                    | 1                    | 1                    | 0.30 |
|                                                          | 1-2 days/week | 1.33<br>(0.88, 2.00) | 1.30<br>(0.86, 1.97) | 0.96<br>(0.51, 1.78) | 0.94<br>(0.50, 1.77) | 1.92<br>(0.90, 4.11) | 1.94<br>(0.91, 4.12) |      |
|                                                          | 3-4 days/week | 1.67<br>(1.10, 2.54) | 1.64<br>(1.07, 2.52) | 1.33<br>(0.66, 2.69) | 1.36<br>(0.66, 2.82) | 2.15<br>(0.96, 4.79) | 2.16<br>(0.97, 4.80) |      |
|                                                          | 5 days/week   | 1.86<br>(1.21, 2.86) | 1.85<br>(1.20, 2.86) | 1.68<br>(0.86, 3.25) | 1.67<br>(0.84, 3.32) | 2.18<br>(1.04, 4.60) | 2.20<br>(1.04, 4.62) |      |
| P for trend                                              |               | 0.002                | 0.002                | 0.008                | 0.008                | 0.06                 | 0.06                 |      |
| Activity score (per unit)                                |               | 1.19<br>(1.12, 1.26) | 1.19<br>(1.12, 1.26) | 1.20<br>(1.11, 1.30) | 1.19<br>(1.10, 1.30) | 1.18<br>(1.09, 1.28) | 1.18<br>(1.09, 1.28) | 0.79 |

1  
2 \* MVPA Moderate-to-vigorous physical activity; Model 1 is adjusted for age and gender; Model 2 is additionally adjusted for BMI and IMD score  
3  
4  
5  
6  
7  
8  
9  
10  
11  
12  
13  
14  
15  
16  
17  
18  
19  
20  
21  
22  
23  
24  
25  
26  
27  
28  
29  
30  
31  
32  
33  
34  
35  
36  
37  
38  
39  
40  
41  
42  
43  
44  
45  
46  
47  
48  
49

For peer review only

1  
2  
3  
4  
5  
6  
7  
8  
9  
10  
11  
12  
13  
14  
15  
16  
17  
18  
19  
20  
21  
22  
23  
24  
25  
26  
27  
28  
29  
30  
31  
32  
33  
34  
35  
36  
37  
38  
39  
40  
41  
42  
43  
44  
45  
46  
47  
48  
49

Figure S1 Scatter plot of sedentary time by activity score in the observed data (N=1003)

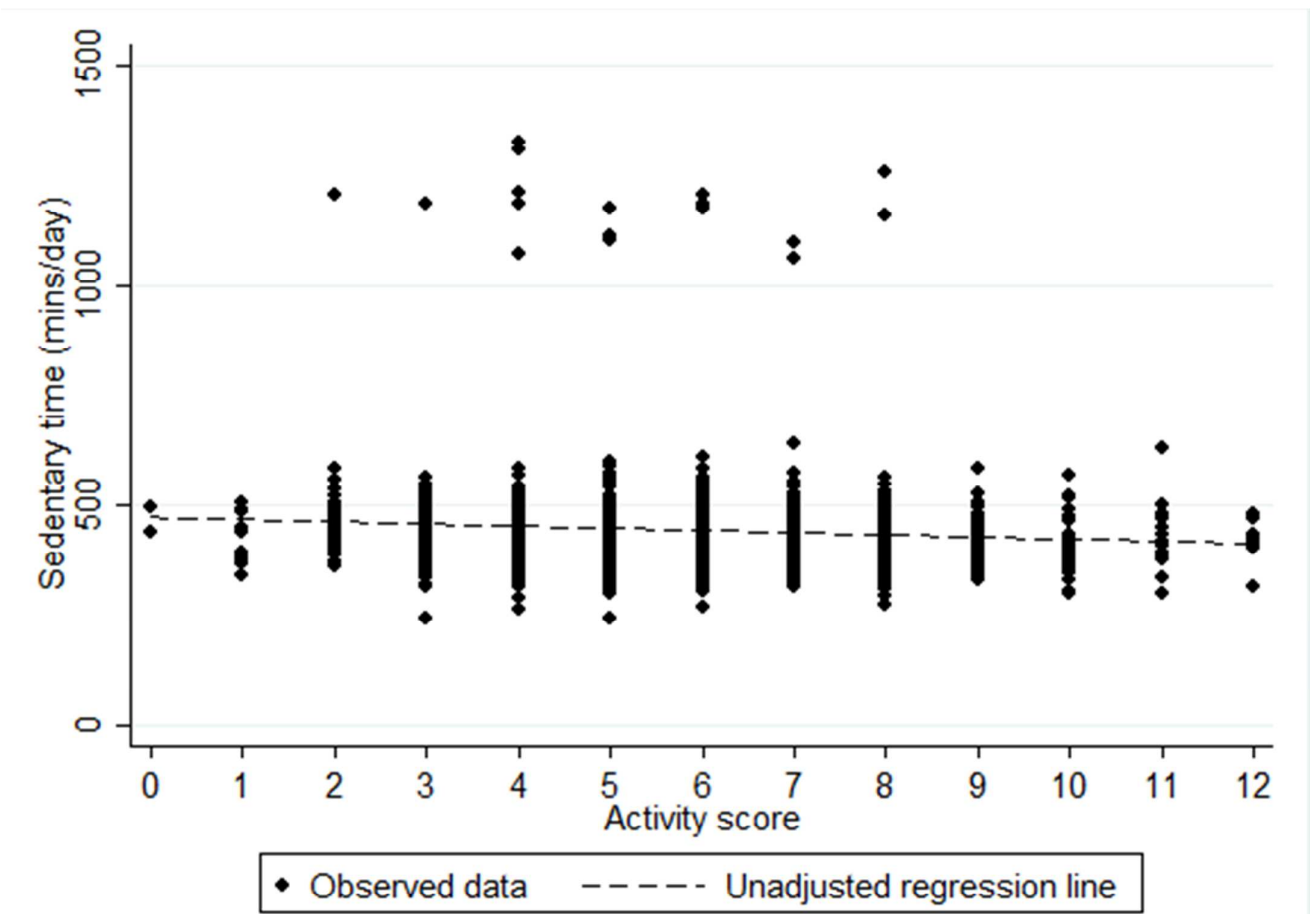

Figure S2 Scatter plot of time spent in moderate-to-vigorous physical activity by activity score in the observed data (N=1003)

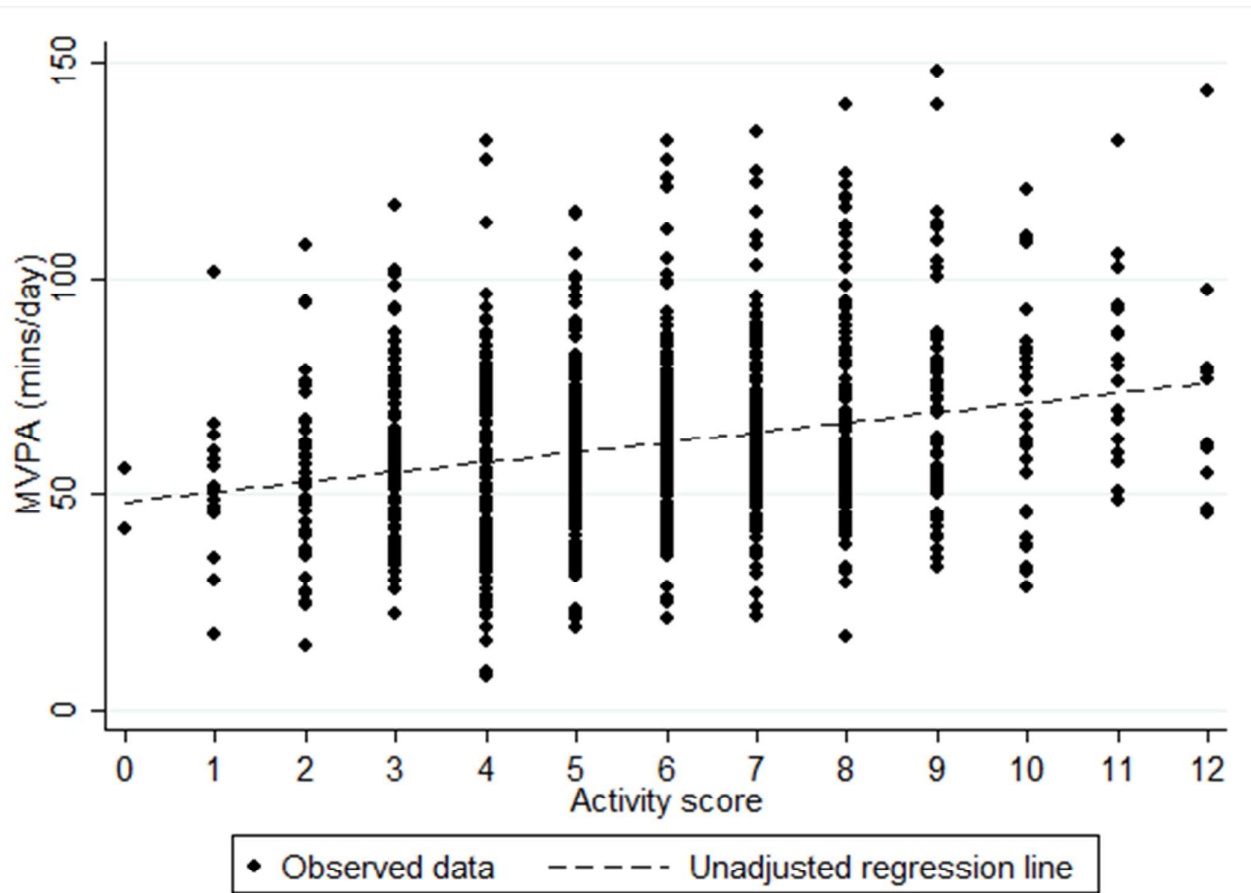

## Organised physical activity, neighbourhood play and child physical activity

STROBE Statement—checklist of items that should be included in reports of observational studies

|                              | Item No | Recommendation                                                                                                                                                                                                                                                                                                                                                                                                                                                                       |
|------------------------------|---------|--------------------------------------------------------------------------------------------------------------------------------------------------------------------------------------------------------------------------------------------------------------------------------------------------------------------------------------------------------------------------------------------------------------------------------------------------------------------------------------|
| Title and abstract           | 1       | (a) Indicate the study's design with a commonly used term in the title or the abstract<br><b>Title Page</b>                                                                                                                                                                                                                                                                                                                                                                          |
|                              |         | (b) Provide in the abstract an informative and balanced summary of what was done and what was found – <b>Pages 2-3</b>                                                                                                                                                                                                                                                                                                                                                               |
| <b>Introduction</b>          |         |                                                                                                                                                                                                                                                                                                                                                                                                                                                                                      |
| Background/rationale         | 2       | Explain the scientific background and rationale for the investigation being reported – <b>Pages 5-6</b>                                                                                                                                                                                                                                                                                                                                                                              |
| Objectives                   | 3       | State specific objectives, including any prespecified hypotheses – <b>Page 6.</b>                                                                                                                                                                                                                                                                                                                                                                                                    |
| <b>Methods</b>               |         |                                                                                                                                                                                                                                                                                                                                                                                                                                                                                      |
| Study design                 | 4       | Present key elements of study design early in the paper <b>Pages 6-7.</b>                                                                                                                                                                                                                                                                                                                                                                                                            |
| Setting                      | 5       | Describe the setting, locations, and relevant dates, including periods of recruitment, exposure, follow-up, and data collection <b>Page 6.</b>                                                                                                                                                                                                                                                                                                                                       |
| Participants                 | 6       | (a) <i>Cohort study</i> —Give the eligibility criteria, and the sources and methods of selection of participants. Describe methods of follow-up<br><i>Case-control study</i> —Give the eligibility criteria, and the sources and methods of case ascertainment and control selection. Give the rationale for the choice of cases and controls<br><i>Cross-sectional study</i> —Give the eligibility criteria, and the sources and methods of selection of participants <b>Page 7</b> |
|                              |         | (b) <i>Cohort study</i> —For matched studies, give matching criteria and number of exposed and unexposed<br><i>Case-control study</i> —For matched studies, give matching criteria and the number of controls per case                                                                                                                                                                                                                                                               |
| Variables                    | 7       | Clearly define all outcomes, exposures, predictors, potential confounders, and effect modifiers. Give diagnostic criteria, if applicable - <b>Page 7-8</b>                                                                                                                                                                                                                                                                                                                           |
| Data sources/<br>measurement | 8*      | For each variable of interest, give sources of data and details of methods of assessment (measurement). Describe comparability of assessment methods if there is more than one group <b>Page 7-8</b>                                                                                                                                                                                                                                                                                 |
| Bias                         | 9       | Describe any efforts to address potential sources of bias – <b>Page 8</b>                                                                                                                                                                                                                                                                                                                                                                                                            |
| Study size                   | 10      | Explain how the study size was arrived at - <b>Page 8</b>                                                                                                                                                                                                                                                                                                                                                                                                                            |
| Quantitative variables       | 11      | Explain how quantitative variables were handled in the analyses. If applicable, describe which groupings were chosen and why - <b>Pages 8-9</b>                                                                                                                                                                                                                                                                                                                                      |
| Statistical methods          | 12      | (a) Describe all statistical methods, including those used to control for confounding – <b>Pages 8-9</b>                                                                                                                                                                                                                                                                                                                                                                             |
|                              |         | (b) Describe any methods used to examine subgroups and interactions – <b>Pages 8-9</b>                                                                                                                                                                                                                                                                                                                                                                                               |
|                              |         | (c) Explain how missing data were addressed - <b>Pages 8-9</b>                                                                                                                                                                                                                                                                                                                                                                                                                       |
|                              |         | (d) <i>Cohort study</i> —If applicable, explain how loss to follow-up was addressed<br><i>Case-control study</i> —If applicable, explain how matching of cases and controls was addressed<br><i>Cross-sectional study</i> —If applicable, describe analytical methods taking account of                                                                                                                                                                                              |

|  |  |                                                 |
|--|--|-------------------------------------------------|
|  |  | sampling strategy - Page 9                      |
|  |  | (e) Describe any sensitivity analyses – Page 10 |

Continued on next page

For peer review only



**Results**

|                  |     |                                                                                                                                                                                                                                                                                                                                                                                                                                                                                                              |
|------------------|-----|--------------------------------------------------------------------------------------------------------------------------------------------------------------------------------------------------------------------------------------------------------------------------------------------------------------------------------------------------------------------------------------------------------------------------------------------------------------------------------------------------------------|
| Participants     | 13* | (a) Report numbers of individuals at each stage of study—eg numbers potentially eligible, examined for eligibility, confirmed eligible, included in the study, completing follow-up, and analysed <a href="#">Table 1</a><br>(b) Give reasons for non-participation at each stage<br>(c) Consider use of a flow diagram - <a href="#">NA</a>                                                                                                                                                                 |
| Descriptive data | 14* | (a) Give characteristics of study participants (eg demographic, clinical, social) and information on exposures and potential confounders – <a href="#">Table 1</a><br>(b) Indicate number of participants with missing data for each variable of interest - <a href="#">Table 1</a><br>(c) <i>Cohort study</i> —Summarise follow-up time (eg, average and total amount)                                                                                                                                      |
| Outcome data     | 15* | <i>Cohort study</i> —Report numbers of outcome events or summary measures over time<br><i>Case-control study</i> —Report numbers in each exposure category, or summary measures of exposure<br><i>Cross-sectional study</i> —Report numbers of outcome events or summary measures <a href="#">Table 1</a>                                                                                                                                                                                                    |
| Main results     | 16  | (a) Give unadjusted estimates and, if applicable, confounder-adjusted estimates and their precision (eg, 95% confidence interval). Make clear which confounders were adjusted for and why they were included – <a href="#">Tables 2-4</a><br>(b) Report category boundaries when continuous variables were categorized - <a href="#">Tables 2-4</a><br>(c) If relevant, consider translating estimates of relative risk into absolute risk for a meaningful time period Discussion – <a href="#">Page 18</a> |
| Other analyses   | 17  | Report other analyses done—eg analyses of subgroups and interactions, and sensitivity analyses – <a href="#">Supplementary tables</a>                                                                                                                                                                                                                                                                                                                                                                        |

**Discussion**

|                  |    |                                                                                                                                                                                                      |
|------------------|----|------------------------------------------------------------------------------------------------------------------------------------------------------------------------------------------------------|
| Key results      | 18 | Summarise key results with reference to study objectives – <a href="#">Page 21</a>                                                                                                                   |
| Limitations      | 19 | Discuss limitations of the study, taking into account sources of potential bias or imprecision. Discuss both direction and magnitude of any potential bias - <a href="#">Page 23</a>                 |
| Interpretation   | 20 | Give a cautious overall interpretation of results considering objectives, limitations, multiplicity of analyses, results from similar studies, and other relevant evidence – <a href="#">Page 22</a> |
| Generalisability | 21 | Discuss the generalisability (external validity) of the study results <a href="#">Page 22</a>                                                                                                        |

**Other information**

|         |    |                                                                                                                                                                                         |
|---------|----|-----------------------------------------------------------------------------------------------------------------------------------------------------------------------------------------|
| Funding | 22 | Give the source of funding and the role of the funders for the present study and, if applicable, for the original study on which the present article is based – <a href="#">Page 24</a> |
|---------|----|-----------------------------------------------------------------------------------------------------------------------------------------------------------------------------------------|

\*Give information separately for cases and controls in case-control studies and, if applicable, for exposed and unexposed groups in cohort and cross-sectional studies.

**Note:** An Explanation and Elaboration article discusses each checklist item and gives methodological background and published examples of transparent reporting. The STROBE checklist is best used in conjunction with this article (freely available on the Web sites of PLoS Medicine at <http://www.plosmedicine.org/>, Annals of Internal Medicine at <http://www.annals.org/>, and Epidemiology at <http://www.epidem.com/>). Information on the STROBE Initiative is available at [www.strobe-statement.org](http://www.strobe-statement.org).

# BMJ Open

**Associations between participation in organised physical activity in the school or community outside school hours, and neighbourhood play with child physical activity and sedentary time: a cross-sectional analysis of primary school-aged children from the UK**

|                                 |                                                                                                                                                                                                                                                                                                                                                                                                                                                                                                                                                                                                                                                                                                                                                                  |
|---------------------------------|------------------------------------------------------------------------------------------------------------------------------------------------------------------------------------------------------------------------------------------------------------------------------------------------------------------------------------------------------------------------------------------------------------------------------------------------------------------------------------------------------------------------------------------------------------------------------------------------------------------------------------------------------------------------------------------------------------------------------------------------------------------|
| Journal:                        | <i>BMJ Open</i>                                                                                                                                                                                                                                                                                                                                                                                                                                                                                                                                                                                                                                                                                                                                                  |
| Manuscript ID                   | bmjopen-2017-017588.R1                                                                                                                                                                                                                                                                                                                                                                                                                                                                                                                                                                                                                                                                                                                                           |
| Article Type:                   | Research                                                                                                                                                                                                                                                                                                                                                                                                                                                                                                                                                                                                                                                                                                                                                         |
| Date Submitted by the Author:   | 26-Jun-2017                                                                                                                                                                                                                                                                                                                                                                                                                                                                                                                                                                                                                                                                                                                                                      |
| Complete List of Authors:       | Jago, Russell; Univ Bristol, Centre for Exercise, Nutrition & Health Sciences, School for Policy Studies<br>Macdonald-Wallis, Corrie; University of Bristol, Centre for Exercise, Nutrition & Health Sciences, School for Policy Studies, University of Bristol<br>Solomon-Moore, Emma; Univ Bristol, Centre for Exercise, Nutrition & Health Sciences, School for Policy Studies<br>Thompson, Janice; The University of Birmingham, School of Sport, Exercise and Rehabilitation Sciences<br>Lawlor, Debbie; University of Bristol School of Social and Community Medicine, MRC Integrative Epidemiology Unit at the University of Bristol<br>Sebire, Simon; University of Bristol, Centre for Exercise, Nutrition & Health Sciences, School for Policy Studies |
| <b>Primary Subject Heading</b>: | Public health                                                                                                                                                                                                                                                                                                                                                                                                                                                                                                                                                                                                                                                                                                                                                    |
| Secondary Subject Heading:      | Paediatrics                                                                                                                                                                                                                                                                                                                                                                                                                                                                                                                                                                                                                                                                                                                                                      |
| Keywords:                       | Physical activity, children, accelerometer, extra-curricular, play                                                                                                                                                                                                                                                                                                                                                                                                                                                                                                                                                                                                                                                                                               |
|                                 |                                                                                                                                                                                                                                                                                                                                                                                                                                                                                                                                                                                                                                                                                                                                                                  |

SCHOLARONE™  
Manuscripts

1 Associations between participation in organised physical activity in the school or community  
2 outside school hours, and neighbourhood play with child physical activity and sedentary  
3 time: a cross-sectional analysis of primary school-aged children from the UK

4 Russell Jago <sup>1§</sup>, Corrie Macdonald-Wallis <sup>1</sup>, Emma Solomon-Moore <sup>1</sup>, Janice L. Thompson <sup>2</sup>,  
5 Deborah A. Lawlor <sup>3,4</sup> and Simon J. Sebire <sup>1</sup>

6  
7 <sup>1</sup> Centre for Exercise, Nutrition & Health Sciences, School for Policy Studies, University of  
8 Bristol, 8 Priory Road, Bristol, BS8 1TZ, UK.

9 <sup>2</sup> School of Sport, Exercise and Rehabilitation Sciences, University of Birmingham,  
10 Birmingham, B15 2TT, UK.

11 <sup>3</sup> MRC Integrative Epidemiology Unit at the University of Bristol, Oakfield House, Oakfield  
12 Grove, Bristol, BS8 2BN, UK.

13 <sup>4</sup> School of Social and Community Medicine, University of Bristol, Canynge Hall,  
14 Whiteladies Road, Bristol, BS8 2PS, UK.

15 <sup>§</sup> **Corresponding author:** Prof Russell Jago, Centre for Exercise, Nutrition & Health  
16 Sciences, School for Policy Studies, University of Bristol, 8 Priory Road, Bristol, BS8 1TZ,  
17 UK. Email: [russ.jago@bris.ac.uk](mailto:russ.jago@bris.ac.uk); Telephone: +44 (0)117 9546603

18  
19 **Email addresses**

20 RJ: [russ.jago@bris.ac.uk](mailto:russ.jago@bris.ac.uk)

21 CMW: [C.Macdonald-Wallis@bristol.ac.uk](mailto:C.Macdonald-Wallis@bristol.ac.uk)

22 ESM: [Emma.solomon@bristol.ac.uk](mailto:Emma.solomon@bristol.ac.uk)

23 JLT: [j.thompson.1@bham.ac.uk](mailto:j.thompson.1@bham.ac.uk)

24 DAL: [d.a.lawlor@bristol.ac.uk](mailto:d.a.lawlor@bristol.ac.uk)

25 SJS: [simon.sebire@bristol.ac.uk](mailto:simon.sebire@bristol.ac.uk)

26  
27 **Word count:** Manuscript (excluding tables) = 3270 words      Abstract = 298 words

28

1  
2  
3 29 **ABSTRACT**  
4  
5

6 30 **Objectives:** Assess the extent to which participation in organised physical activity in the  
7  
8 31 school or community outside school hours, and neighbourhood play, were associated with  
9  
10 32 children's physical activity and sedentary time.  
11

12 33 **Design:** Cross-sectional study.  
13

14 34 **Setting:** Children were recruited from 47 state funded primary schools in Southwest England.  
15  
16

17 35 **Participants:** 1223 8-9 year old children.  
18

19 36 **Outcome measures:** Accelerometer-assessed moderate-to-vigorous-intensity physical  
20  
21 37 activity (MVPA) and sedentary time.  
22  
23

24 38  
25  
26 39 **Methods:** Children wore an accelerometer and mean minutes of MVPA and sedentary time  
27  
28 40 per day were derived. Children reported their attendance at organised physical activity in the  
29  
30 41 school or community outside school hours, and neighbourhood play, using a piloted  
31  
32 42 questionnaire. Cross-sectional linear and logistic regression were used to examine if  
33  
34 43 attendance frequency at each setting (and all settings combined) was associated with  
35  
36 44 moderate-to-vigorous-intensity physical activity (MVPA) and sedentary time. Multiple  
37  
38 45 imputation methods were used to account for missing data and increase sample size.  
39  
40  
41  
42

43 46  
44 47 **Results:** Children who attended clubs at school 3-4 days per week obtained an average of  
45  
46 48 7.58 (95% CI: 2.7 to 12.4) more minutes of MVPA per day than children who never attended.  
47  
48 49 Report of participation in the three other non-school-based activities were similarly  
49  
50 50 associated with MVPA. Evidence for associations with sedentary time was generally weaker.  
51  
52 51 Associations were similar in girls and boys. When the four different contexts were combined,  
53  
54 52 each additional 1-2 activities participated in per week increased participants' odds (OR: 1.18,  
55  
56  
57  
58  
59  
60

1  
2  
3 53 95% CI: 1.12 to 1.26) of meeting the Government recommendations for 60 minutes of  
4  
5 54 MVPA per day.  
6

7 55  
8

9  
10 56 **Conclusion:** Participating in organised physical activity at school and in the community is  
11  
12 57 associated with greater physical activity and reduced sedentary time among both boys and  
13  
14 58 girls. All four types of activity contribute to overall physical activity, which provides parents  
15  
16 59 with a range of settings in which to help their child be active.  
17  
18

19 60  
20

21  
22 61 **Key words:** Physical activity, children, accelerometer, clubs, extra-curricular, play  
23  
24  
25  
26  
27  
28  
29  
30  
31  
32  
33  
34  
35  
36  
37  
38  
39  
40  
41  
42  
43  
44  
45  
46  
47  
48  
49  
50  
51  
52  
53  
54  
55  
56  
57  
58  
59  
60

1  
2  
3 62 **ARTICLE SUMMARY**  
4  
5

6 63 **Strengths and limitations of this study**  
7

8  
9 64 **Strengths**

- 10  
11 • Accelerometer data from a large sample of Year 4 children.  
12  
13 • Detailed information on organised physical activity in the school or community  
14  
15 outside school hours, and neighbourhood play.  
16  
17  
18 • Multiple imputation models to provide estimates for participants with missing data.  
19

20  
21 69

22  
23  
24 70 **Limitations**  
25

- 26  
27 • Cross-sectional study design.  
28  
29 • Data are from a single UK region.  
30  
31  
32  
33  
34  
35  
36  
37  
38  
39  
40  
41  
42  
43  
44  
45  
46  
47  
48  
49  
50  
51  
52  
53  
54  
55  
56  
57  
58  
59  
60

## 73 INTRODUCTION

74 Physical activity is associated with improved mental well-being, reduced risk of obesity and  
75 lower blood pressure among children.[1] Sedentary time may also be a risk factor for non-  
76 communicable diseases but it is not clear if this effect is independent of physical activity.[2-  
77 4] The UK Chief Medical Officers recommend that all children and young people should  
78 engage in at least an hour per day of moderate-to-vigorous-intensity physical activity  
79 (MVPA) and limit sedentary time,[5] however considerable proportions of children do not  
80 meet these guidelines.[6] For example, data from the nationally-representative Millennium  
81 cohort showed that only 51% of 7-8 year olds met the recommendation.[7] The amount of  
82 time children spend engaged in MVPA gradually declines with age, while sedentary time  
83 increases.[6 8-11] Strategies to increase children's physical activity are needed.

84  
85 The majority of interventions to increase children's physical activity have been delivered  
86 during school time.[12 13] These interventions have included strategies such as changes to  
87 the physical education provision and new educational programmes based on information  
88 sharing and personal goal setting.[12-14] Overall, these programmes have tended to report no  
89 effect, weak effects or moderate effects in sub-groups.[12-16] Potential reasons for this are  
90 the difficulty faced in adding interventions to already full school-curricula and the lack of  
91 skills and training that teachers have for delivering a range of activities to engage the  
92 majority of children.[17] As such, there is a need to understand the potential of organised  
93 physical activity outside school hours to increase MVPA.

94  
95 After-school programmes have the potential to facilitate physical activity for children, as  
96 schools have space in which children can be active, staff who can be trained, and many  
97 parents welcome programmes that provide childcare.[16 18-21] Although a number of studies

1  
2  
3 98 have examined the potential of delivering such sessions, it is not clear whether attendance at  
4  
5 99 the programmes currently provided by schools is associated with higher overall levels of  
6  
7 100 MVPA.[18-21] There is also a lack of information about how attendance at community-based  
8  
9 101 physical activity clubs contributes to overall MVPA. Furthermore, as not all children attend  
10  
11 102 after-school programmes, it is not clear how other activities such as playing in the  
12  
13 103 neighbourhood or at home in the garden contribute to overall MVPA. A key question,  
14  
15 104 therefore, is whether the frequency of participation in organised physical activity in the  
16  
17 105 school or community after school hours, neighbourhood play or home play is associated with  
18  
19 106 the MVPA and sedentary time of children. Since some children will be active in all four  
20  
21 107 settings, it would also be informative to examine collective participation across all settings.  
22  
23  
24  
25  
26

27 109 The aim of this study was to assess among children (8-9 years of age) the extent to which  
28  
29 110 participation in organised physical activity in the school or community outside school hours,  
30  
31 111 and playing with friends or family near the home or in the garden were associated with  
32  
33 112 MVPA and sedentary time. A secondary aim was to examine if there was a cumulative  
34  
35 113 association between participation in the four different types of activities with both MVPA  
36  
37 114 and sedentary time.  
38  
39  
40  
41  
42

## 43 116 **METHODS**

44  
45 117 The current analyses used data from the B-Proact1v study, which has been described in detail  
46  
47 118 elsewhere.[11 22 23] Briefly, the study aimed to examine physical activity behaviours of  
48  
49 119 children and their parents over the course of primary school. Between 2012 and 2013, data  
50  
51 120 were collected from 1299 Year 1 children (5-6 years of age) from 57 schools in Bristol (UK).  
52  
53 121 Between March 2015 and July 2016, all 57 schools were approached to re-join the study  
54  
55 122 when the children were in Year 4 (8-9 years of age), with 47 schools agreeing to take part  
56  
57  
58  
59  
60



1  
2  
3 123 (1223 children). The current analyses used data from the Year 4 assessments. The study  
4  
5 124 received ethical approval from the School for Policy Studies Ethics Committee at the  
6  
7 125 University of Bristol, and written parent consent was received for all participants.  
8  
9

10 126

11  
12 127 ***Data collection***

13  
14 128 Data were collected at schools, with children asked to complete a brief questionnaire. As  
15  
16 129 indicators of organised physical activity outside school hours in school and in the community  
17  
18 130 respectively, we asked “How often do you attend... a) a sport or exercise club at school (NOT  
19  
20 131 including PE)? and b) a sport or exercise club at places other than your school (like a football  
21  
22 132 club or ballet)?” To indicate neighbourhood play outside and within the home we asked  
23  
24 133 “How much do you play with your friends and family... a) outside near your home? and b) in  
25  
26 134 your home or garden?”. These questions each had four response options: “Never”, “1-2 days  
27  
28 135 per week”, “3-4 days per week” or “5 days per week”. We assigned these 0, 1, 2 and 3 points  
29  
30 136 respectively and summed responses to derive an overall activity score ranging from 0 to 12,  
31  
32 137 with a higher value indicating a higher frequency of activity participation.  
33  
34

35  
36 138

37  
38 139 Child height was measured to the nearest 0.1cm using a SECA Leicester stadiometer (HAB  
39  
40 140 International, Northampton). Weight was recorded to the nearest 0.1kg using a SECA 899  
41  
42 141 digital scale (HAB International, Northampton). Child Body Mass Index ( $BMI = kg/m^2$ ) was  
43  
44 142 then calculated and converted to an age- and gender-specific standard deviation score.[24 25]  
45  
46 143 Children wore a waist-worn ActiGraph wGT3X-BT accelerometer for five days including  
47  
48 144 two weekend days. Parents provided demographic information via a questionnaire, including  
49  
50 145 child gender and date of birth. Where children’s date of birth was missing (20.5% of  
51  
52 146 children), they were assigned the median age of 9.0 years. Indices of Multiple Deprivation  
53  
54 147 (IMD) scores, based upon the English Indices of Deprivation  
55  
56  
57  
58  
59  
60

1  
2  
3 148 (<http://data.gov.uk/dataset/index-of-multiple-deprivation>), were assigned to each child based  
4  
5 149 on their reported home postcode, where higher IMD scores indicate a greater level of  
6  
7 150 deprivation.  
8

9  
10 151

### 11 152 *Accelerometer data reduction*

12  
13  
14 153 Accelerometer data were processed using Kinesoft (v3.3.75; Kinesoft, Saskatchewan,  
15  
16 154 Canada). At least three valid days of data were required for accelerometer data to be  
17  
18 155 considered complete for a given child and included in analysis, where a valid day was defined  
19  
20 156 as at least 500 minutes of data, after excluding intervals of  $\geq 60$  minutes of zero counts  
21  
22 157 allowing up to two minutes of interruptions. We recognise that there is considerable variation  
23  
24 158 in the number of minutes of accelerometer data that are required to be considered  
25  
26 159 representative of a valid day.[26] These have ranged from 360 minutes per day which has  
27  
28 160 been used for 6 to 8 year old children,[27] to 800 minutes which has been used for older  
29  
30 161 children.[28 29] Within the field there is no consensus on the minimum number of minutes  
31  
32 162 per day that are needed for a day to be considered valid. We, therefore, adopted a 500 minute  
33  
34 163 per day threshold to ensure that our data are comparable to the methods employed by the  
35  
36 164 International Children's Accelerometer Database,[6] which has pooled data from over 27,000  
37  
38 165 children across 20 large global cohorts. The child's average number of sedentary and MVPA  
39  
40 166 minutes per day were derived using population-specific cut points for children.[30] We also  
41  
42 167 derived a binary variable indicating whether the child's average daily MVPA was greater  
43  
44 168 than the 60 minutes per day recommended by the UK government.[5]  
45  
46  
47  
48

49 169

### 50 170 *Analysis*

1  
2  
3 171 The associations of child characteristics (gender, age, BMI z-score, and IMD) with activity  
4  
5 172 participation were examined in the observed data using t-tests, Pearson's correlation  
6  
7 173 coefficients, chi-squared tests and one-way analysis of variance as appropriate.  
8  
9

10 174

11  
12  
13 175 Multiple imputation of missing data was used to create 20 imputed datasets for the 1223 Year  
14  
15 176 4 children. We used 20 cycles of regression switching and combined regression coefficients  
16  
17 177 across datasets using Rubin's rules.[31] We imputed separately for boys and girls to allow for  
18  
19 178 associations to differ by gender. All exposures (organised physical activity attendance and  
20  
21 179 neighbourhood play), outcomes (sedentary time and MVPA), potential confounders (gender,  
22  
23 180 age, BMI z-score, and IMD) and child's school were included in multiple imputation models,  
24  
25 181 and achievement of the MVPA guideline and overall activity score were imputed passively.  
26  
27 182 Any children with less than three valid days of accelerometer data had their accelerometer  
28  
29 183 measures imputed.  
30  
31  
32

33 184

34  
35  
36 185 We examined the pairwise associations of the activity participation variables by  
37  
38 186 dichotomising, cross-tabulating and fitting unadjusted logistic regression models of one  
39  
40 187 frequency variable on another.  
41  
42  
43

44 188

45  
46  
47 189 We used linear regression models to examine the associations of activity participation and the  
48  
49 190 overall activity score with the child's average sedentary and MVPA minutes per day, and  
50  
51 191 logistic regression models to examine associations with achievement of the MVPA guideline.  
52  
53 192 In Model 1 we adjusted for gender and age, and in Model 2 we adjusted additionally for BMI  
54  
55 193 z-score and IMD. To account for the clustering of children in schools and the associated  
56  
57 194 potential to underestimate the standard errors which are used to compute the 95% confidence  
58  
59  
60

1  
2  
3 195 intervals and p-values, robust standard errors, which took account of the school level  
4  
5 196 clustering, were used for all models. Combined Wald tests were used to test for evidence of  
6  
7 197 interaction between the child's gender and the exposure of interest.  
8  
9

10 198

11  
12  
13 199 We predicted the children's mean number of sedentary and MVPA minutes per day by  
14  
15 200 frequency of participation in each activity based on linear combinations of the regression  
16  
17 201 coefficients from fully-adjusted models (Model 2).  
18  
19

20 202

21  
22  
23 203 Regression analyses were repeated restricting to the children who had complete data for all  
24  
25 204 exposures, outcomes and co-variables and compared with the multiple imputation analysis.  
26

27 205 We also produced scatter plots of sedentary time and MVPA by the overall activity score in  
28  
29 206 the observed data.  
30  
31

32 207

33  
34 208 A sensitivity analysis was performed including accelerometer data for any children who had  
35  
36 209 at least one valid day of measures to assess whether only including accelerometer data for  
37  
38 210 children who recorded at least three valid days influenced our results. All analyses were  
39  
40 211 performed in Stata version 14.0 (StataCorp, 2015).  
41  
42

43 212

## 44 213 **RESULTS**

45  
46 214 The distributions of characteristics of the children in the observed data, multiple imputation  
47  
48 215 datasets and subset with complete information are shown in Table 1. All characteristics  
49  
50 216 showed similar distributions in each of the datasets and had only a small proportion of  
51  
52 217 missing data (maximum 16.1% for accelerometer measures).  
53  
54  
55  
56  
57  
58  
59  
60

Table 1 Characteristics of children who took part in the Year 4 phase of the B-Proact1v Study (observed and multiple imputation) N=1223

| Child Characteristic                                        |                   | Observed data |                | Imputed data<br>(N=1223) | Complete data<br>(N=987) |
|-------------------------------------------------------------|-------------------|---------------|----------------|--------------------------|--------------------------|
|                                                             |                   | N available   | Mean (SD) or % | Mean (SD) or %           | Mean (SD) or %           |
| Sedentary time at Year 4 (mins/day)                         |                   | 1026          | 445.4 (115.4)  | 444.7 (120.1)            | 446.0 (116.9)            |
| MVPA at Year 4 (mins/day)                                   |                   | 1026          | 61.6 (21.9)    | 61.9 (22.5)              | 61.8 (21.8)              |
| Met MVPA guidelines at Year 4                               | No                | 1163          | 53.2           | 52.6                     | 53.4                     |
|                                                             | Yes               |               | 46.8           | 47.4                     | 46.6                     |
| Gender                                                      | Boy               | 1223          | 45.5           | 45.5                     | 44.5                     |
|                                                             | Girl              |               | 54.5           | 54.5                     | 55.5                     |
| Age at Year 4 (years)                                       |                   | 1223          | 9.03 (0.41)    | 9.03 (0.41)              | 9.03 (0.43)              |
| BMI z score at Year 4                                       |                   | 1208          | 0.35 (1.08)    | 0.36 (1.08)              | 0.31 (1.07)              |
| IMD score at Year 4                                         |                   | 1204          | 15.9 (14.1)    | 15.9 (14.2)              | 15.3 (13.6)              |
| Frequency child attends sport/exercise club at school       | Never             | 1215          | 27.8           | 27.9                     | 28.2                     |
|                                                             | 1-2 days per week |               | 45.5           | 45.5                     | 45.8                     |
|                                                             | 3-4 days per week |               | 16.1           | 16.1                     | 16.6                     |
|                                                             | 5 days per week   |               | 10.5           | 10.5                     | 9.4                      |
| Frequency child attends sport/exercise club outside school  | Never             | 1214          | 20.6           | 20.6                     | 19.4                     |
|                                                             | 1-2 days per week |               | 50.2           | 50.2                     | 51.0                     |
|                                                             | 3-4 days per week |               | 20.8           | 20.9                     | 21.5                     |
|                                                             | 5 days per week   |               | 8.3            | 8.3                      | 8.2                      |
| Frequency child plays with friends/family outside near home | Never             | 1205          | 6.3            | 6.4                      | 6.5                      |
|                                                             | 1-2 days per week |               | 33.7           | 33.7                     | 34.3                     |
|                                                             | 3-4 days per week |               | 29.0           | 28.9                     | 29.7                     |
|                                                             | 5 days per week   |               | 31.0           | 30.9                     | 29.5                     |
| Frequency child plays with friends/family in home or garden | Never             | 1199          | 9.6            | 9.7                      | 8.8                      |
|                                                             | 1-2 days per week |               | 34.5           | 34.6                     | 35.0                     |
|                                                             | 3-4 days per week |               | 26.8           | 26.7                     | 27.8                     |
|                                                             | 5 days per week   |               | 29.1           | 29.0                     | 28.5                     |
| Activity frequency score                                    |                   | 1193          | 5.88 (2.29)    | 5.86 (2.29)              | 5.84 (2.26)              |

1  
2  
3 219 *Associations of child characteristics with activity participation*  
4

5 220 Table S1 shows child activity attendance by gender. Girls tended to report lower frequencies  
6  
7 221 of participating in organised physical activity in the school or community outside school  
8  
9 222 hours, and had a lower mean overall activity score. There was no gender difference in  
10  
11 223 friends/family play either in or outside of the home. The associations of other child  
12  
13 224 characteristics with activity participation are shown in Table S2. There was some evidence  
14  
15 225 that children who more frequently attended a sport/exercise club outside of school had a  
16  
17 226 higher mean age. Child BMI was not strongly associated with any particular activity, but  
18  
19 227 there was weak evidence that the overall activity score decreased with increasing BMI Z-  
20  
21 228 score. Children who reported attendance of “Never” or “5 days/week” generally had the  
22  
23 229 highest IMD scores, suggesting a U-shaped association, and there was a negative correlation  
24  
25 230 between the overall activity score and IMD.  
26  
27  
28  
29

30 231

31  
32 232 *Inter-relationships of activity participation frequencies*  
33

34 233 Participating in one type of activity more frequently was generally associated with a higher  
35  
36 234 frequency of participation in each of the others, except that attendance at a sport/exercise club  
37  
38 235 outside of school was not associated with playing outside near the home (Table S3).  
39  
40

41 236

42  
43 237 *Associations of activity participation with sedentary time and MVPA*  
44

45 238 There was a negative correlation of the overall activity score with sedentary time and a  
46  
47 239 positive correlation between the overall activity score and MVPA (Figures S1 and S2).  
48

49 240

50  
51  
52 241 Table 2 shows the mean difference in sedentary time by activity participation and overall

53 242 activity score in the multiple imputation datasets, and Figure 1 shows the predicted sedentary  
54  
55 243 time by activity participation. Sedentary time decreased on average with increasing frequency  
56  
57  
58  
59  
60

1  
2  
3 244 of attending sport/exercise clubs either at school or outside of school and with increasing  
4  
5 245 frequency of playing with friends/family outside near the home in regression models adjusted  
6  
7 246 for gender and age (Model 1). The association between sport/exercise club attendance outside  
8  
9 247 of school and sedentary time weakened slightly on additional adjustment for BMI Z-score  
10  
11 248 and IMD (Model 2) but other associations remained. An increase in children's overall activity  
12  
13 249 score was also strongly associated with a reduction in sedentary time in both models.  
14  
15  
16 250 However, there was no evidence of an association between playing with friends/family at  
17  
18 251 home and sedentary time. Associations did not differ between boys and girls. Findings were  
19  
20  
21 252 similar when restricted to children who had complete data (Table S4).  
22  
23  
24  
25  
26  
27  
28  
29  
30  
31  
32  
33  
34  
35  
36  
37  
38  
39  
40  
41  
42  
43  
44  
45  
46  
47  
48  
49  
50  
51  
52  
53  
54  
55  
56  
57  
58  
59  
60

**Table 2 Mean difference in the children's average sedentary minutes per day associated with different activities using multiple imputation (N=1223)\***

| Exposure                                                      | Sedentary time (minutes/day): mean difference (95% confidence interval) |                |                |               |               |               |               | P for gender interaction |
|---------------------------------------------------------------|-------------------------------------------------------------------------|----------------|----------------|---------------|---------------|---------------|---------------|--------------------------|
|                                                               | All (N=1223)                                                            |                | Boys (N=556)   |               | Girls (N=667) |               |               |                          |
|                                                               | Model 1                                                                 | Model 2        | Model 1        | Model 2       | Model 1       | Model 2       |               |                          |
| Frequency child attends sport/exercise club at school         | Never (ref)                                                             | 0              | 0              | 0             | 0             | 0             | 0             | 0.69                     |
|                                                               | 1-2 days/week                                                           | -4.2           | -3.0           | 7.9           | 8.9           | -13.0         | -11.5         |                          |
|                                                               | 3-4 days/week                                                           | (-22.5, 14.0)  | (-21.4, 15.4)  | (-16.6, 32.3) | (-15.9, 33.7) | (-38.3, 12.4) | (-37.5, 14.4) |                          |
|                                                               |                                                                         | -31.1          | -28.8          | -18.7         | -16.9         | -40.1         | -37.3         |                          |
|                                                               |                                                                         | (-50.7, -11.5) | (-46.4, -11.3) | (-41.8, 4.4)  | (-41.2, 7.3)  | (-71.7, -8.5) | (-65.4, -9.2) |                          |
| 5 days/week                                                   | -18.7                                                                   | -18.8          | -9.6           | -7.3          | -26.0         | -33.3         |               |                          |
|                                                               | (-42.9, 5.6)                                                            | (-42.1, 4.5)   | (-37.7, 18.4)  | (-34.9, 20.4) | (-66.8, 14.8) | (-82.0, 15.5) |               |                          |
| P for trend                                                   | 0.02                                                                    | 0.01           | 0.17           | 0.23          | 0.05          | 0.04          |               |                          |
| Frequency child attends sport/exercise club outside of school | Never (ref)                                                             | 0              | 0              | 0             | 0             | 0             | 0             | 0.81                     |
|                                                               | 1-2 days/week                                                           | 14.8           | 18.0           | 21.5          | 25.9          | 11.0          | 13.6          |                          |
|                                                               | 3-4 days/week                                                           | (-9.1, 38.7)   | (-8.9, 45.0)   | (-7.4, 50.5)  | (-4.5, 56.4)  | (-19.9, 42.0) | (-20.5, 47.7) |                          |
|                                                               |                                                                         | -7.2           | -1.5           | -1.0          | 4.8           | -10.5         | -4.1          |                          |
|                                                               |                                                                         | (-27.0, 12.6)  | (-23.4, 20.4)  | (-32.8, 30.8) | (-27.1, 36.6) | (-30.5, 9.5)  | (-27.3, 19.0) |                          |
| 5 days/week                                                   | -19.9                                                                   | -15.5          | -12.6          | -7.7          | -25.2         | -20.6         |               |                          |
|                                                               | (-41.1, 1.2)                                                            | (-37.7, 6.8)   | (-42.4, 17.1)  | (-36.5, 21.1) | (-55.0, 4.6)  | (-52.1, 11.0) |               |                          |
| P for trend                                                   | 0.02                                                                    | 0.07           | 0.12           | 0.16          | 0.07          | 0.23          |               |                          |
| Frequency child plays with friends/family outside near home   | Never (ref)                                                             | 0              | 0              | 0             | 0             | 0             | 0             | 0.56                     |
|                                                               | 1-2 days/week                                                           | 0.77           | 2.3            | 19.2          | 21.2          | -16.6         | -15.6         |                          |
|                                                               | 3-4 days/week                                                           | (-28.5, 30.0)  | (-28.0, 32.7)  | (-16.5, 55.0) | (-14.4, 56.8) | (-63.1, 30.0) | (-65.0, 33.9) |                          |
|                                                               |                                                                         | -5.2           | -2.8           | 7.6           | 10.6          | -17.6         | -16.1         |                          |
|                                                               |                                                                         | (-29.9, 19.6)  | (-29.4, 23.7)  | (-28.4, 43.5) | (-25.5, 46.6) | (-65.8, 30.5) | (-67.4, 35.3) |                          |
| 5 days/week                                                   | -23.4                                                                   | -24.1          | -11.0          | -10.2         | -35.4         | -37.8         |               |                          |
|                                                               | (-49.0, 2.1)                                                            | (-50.8, 2.7)   | (-45.2, 23.2)  | (-44.4, 24.0) | (-79.9, 9.0)  | (-86.6, 10.9) |               |                          |
| P for trend                                                   | 0.004                                                                   | 0.001          | 0.07           | 0.05          | 0.02          | 0.02          |               |                          |
| Frequency child plays with friends/family in home/garden      | Never (ref)                                                             | 0              | 0              | 0             | 0             | 0             | 0             | 0.90                     |
|                                                               | 1-2 days/week                                                           | 16.2           | 17.9           | 19.2          | 20.6          | 13.1          | 14.9          |                          |
|                                                               | 3-4 days/week                                                           | (-13.8, 46.3)  | (-12.5, 48.2)  | (-22.9, 61.3) | (-21.5, 62.7) | (-25.8, 52.0) | (-24.3, 54.1) |                          |
|                                                               |                                                                         | -3.9           | -0.7           | 3.9           | 6.5           | -10.7         | -6.4          |                          |
|                                                               |                                                                         | (-28.8, 20.9)  | (-26.7, 25.4)  | (-30.5, 38.4) | (-28.7, 41.7) | (-46.6, 25.3) | (-42.9, 30.1) |                          |
| 5 days/week                                                   | 5.3                                                                     | 6.1            | 9.9            | 11.6          | 1.2           | 0.6           |               |                          |
|                                                               | (-22.9, 33.5)                                                           | (-22.5, 34.7)  | (-32.5, 52.3)  | (-31.2, 54.4) | (-39.2, 41.5) | (-40.2, 41.5) |               |                          |
| P for trend                                                   | 0.49                                                                    | 0.49           | 0.85           | 0.91          | 0.49          | 0.45          |               |                          |
| Activity score (per unit)                                     | -4.8                                                                    | -4.6           | -3.8           | -3.4          | -5.9          | -5.9          | 0.41          |                          |
|                                                               | (-7.3, -2.3)                                                            | (-7.0, -2.1)   | (-7.7, 0.1)    | (-7.2, 0.4)   | (-10.0, -1.7) | (-10.2, -1.6) |               |                          |

\*Model 1 is adjusted for age and gender; Model 2 is additionally adjusted for BMI and IMD score



1  
2  
3 255 The mean difference in MVPA by each of the activity variables in the multiple imputation  
4  
5 256 data is shown in Table 3, with predicted MVPA by activity participation presented in Figure  
6  
7 257 2. A higher frequency of attending sport/exercise clubs either at school or outside of school  
8  
9 258 and of play either outside or in the home/garden were all associated with greater MVPA on  
10  
11 259 average in Models 1 and 2. Associations were similar in boys and girls. A higher overall  
12  
13 260 activity score was also associated with greater MVPA, with some evidence that this  
14  
15 261 association was stronger in boys than in girls. Associations were similar when restricted to  
16  
17 262 children with complete data (Table S5).  
18  
19  
20  
21  
22  
23  
24  
25  
26  
27  
28  
29  
30  
31  
32  
33  
34  
35  
36  
37  
38  
39  
40  
41  
42  
43  
44  
45  
46  
47  
48  
49  
50  
51  
52  
53  
54  
55  
56  
57  
58  
59  
60

Table 3 Mean difference in the children's average MVPA minutes per day associated with different activities using multiple imputation (N=1223)\*

| Exposure                                                      |               | Moderate-to-vigorous physical activity (minutes/day): mean difference (95% confidence interval) |                     |                     |                     |                     |                     | P for gender interaction |
|---------------------------------------------------------------|---------------|-------------------------------------------------------------------------------------------------|---------------------|---------------------|---------------------|---------------------|---------------------|--------------------------|
|                                                               |               | All (N=1223)                                                                                    |                     | Boys (N=556)        |                     | Girls (N=667)       |                     |                          |
|                                                               |               | Model 1                                                                                         | Model 2             | Model 1             | Model 2             | Model 1             | Model 2             |                          |
| Frequency child attends sport/exercise club at school         | Never (ref)   | 0                                                                                               | 0                   | 0                   | 0                   | 0                   | 0                   | 0.64                     |
|                                                               | 1-2 days/week | 3.7<br>(0.3, 7.2)                                                                               | 3.6<br>(0.1, 7.0)   | 4.4<br>(-2.1, 10.9) | 4.1<br>(-2.3, 10.5) | 3.2<br>(-0.3, 6.7)  | 3.1<br>(-0.3, 6.6)  |                          |
|                                                               | 3-4 days/week | 7.8<br>(2.9, 12.6)                                                                              | 7.5<br>(2.7, 12.4)  | 10.1<br>(2.6, 17.7) | 9.6<br>(2.0, 17.2)  | 5.9<br>(0.9, 10.8)  | 5.8<br>(0.9, 10.7)  |                          |
|                                                               | 5 days/week   | 5.9<br>(-0.1, 11.8)                                                                             | 5.7<br>(-0.3, 11.7) | 7.5<br>(-0.4, 15.4) | 7.0<br>(-1.1, 15.0) | 3.8<br>(-3.7, 11.3) | 3.6<br>(-4.1, 11.4) |                          |
| P for trend                                                   |               | 0.007                                                                                           | 0.01                | 0.02                | 0.03                | 0.05                | 0.06                |                          |
| Frequency child attends sport/exercise club outside of school | Never (ref)   | 0                                                                                               | 0                   | 0                   | 0                   | 0                   | 0                   | 0.80                     |
|                                                               | 1-2 days/week | 0.9<br>(-2.5, 4.3)                                                                              | 0.7<br>(-2.9, 4.4)  | 1.8<br>(-4.7, 8.3)  | 1.3<br>(-5.5, 8.2)  | 0.5<br>(-3.3, 4.4)  | 0.5<br>(-3.4, 4.5)  |                          |
|                                                               | 3-4 days/week | 6.9<br>(2.4, 11.5)                                                                              | 6.5<br>(1.9, 11.2)  | 8.9<br>(1.0, 16.8)  | 8.1<br>(0.1, 16.0)  | 5.5<br>(0.9, 10.1)  | 5.6<br>(1.1, 10.2)  |                          |
|                                                               | 5 days/week   | 9.9<br>(3.8, 16.0)                                                                              | 9.6<br>(3.3, 15.9)  | 11.8<br>(3.4, 20.1) | 11.2<br>(2.4, 19.9) | 8.2<br>(0.7, 15.7)  | 8.2<br>(0.8, 15.7)  |                          |
| P for trend                                                   |               | <0.001                                                                                          | <0.001              | 0.001               | 0.002               | 0.007               | 0.006               |                          |
| Frequency child plays with friends/family outside near home   | Never (ref)   | 0                                                                                               | 0                   | 0                   | 0                   | 0                   | 0                   | 0.19                     |
|                                                               | 1-2 days/week | 0.7<br>(-4.6, 6.0)                                                                              | 0.4<br>(-4.9, 5.6)  | 0.0<br>(-9.3, 9.2)  | -0.5<br>(-9.9, 8.9) | 1.4<br>(-6.0, 8.8)  | 1.3<br>(-6.2, 8.7)  |                          |
|                                                               | 3-4 days/week | 5.1<br>(-0.9, 11.1)                                                                             | 4.8<br>(-1.1, 10.7) | 6.1<br>(-4.1, 16.3) | 5.7<br>(-4.5, 15.9) | 4.4<br>(-3.5, 12.3) | 4.3<br>(-3.7, 12.2) |                          |
|                                                               | 5 days/week   | 9.6<br>(4.0, 15.3)                                                                              | 9.5<br>(3.9, 15.2)  | 13.0<br>(3.3, 22.8) | 12.9<br>(3.0, 22.7) | 6.7<br>(-0.7, 14.0) | 6.6<br>(-0.9, 14.0) |                          |
| P for trend                                                   |               | <0.001                                                                                          | <0.001              | <0.001              | <0.001              | 0.005               | 0.006               |                          |
| Frequency child plays with friends/family in home/garden      | Never (ref)   | 0                                                                                               | 0                   | 0                   | 0                   | 0                   | 0                   | 0.38                     |
|                                                               | 1-2 days/week | 2.0<br>(-2.4, 6.4)                                                                              | 1.6<br>(-2.7, 6.0)  | -0.1<br>(-8.4, 8.3) | -0.6<br>(-8.9, 7.7) | 3.8<br>(-2.2, 9.8)  | 3.6<br>(-2.4, 9.7)  |                          |
|                                                               | 3-4 days/week | 5.6<br>(0.9, 10.3)                                                                              | 5.3<br>(0.4, 10.2)  | 5.6<br>(-3.1, 14.3) | 5.4<br>(-3.5, 14.4) | 5.7<br>(-0.6, 11.9) | 5.5<br>(-0.9, 12.0) |                          |
|                                                               | 5 days/week   | 7.4<br>(3.0, 11.8)                                                                              | 7.1<br>(2.7, 11.6)  | 8.3<br>(0.1, 16.6)  | 7.7<br>(-0.7, 16.1) | 6.6<br>(0.7, 12.5)  | 6.5<br>(0.6, 12.5)  |                          |

1  
2  
3  
4  
5  
6  
7  
8  
9  
10  
11  
12  
13  
14  
15  
16  
17  
18  
19  
20  
21  
22  
23  
24  
25  
26  
27  
28  
29  
30  
31  
32  
33  
34  
35  
36  
37  
38  
39  
40  
41  
42  
43  
44  
45  
46  
47  
48  
49

|                           |                   |                   |                   |                   |                   |                   |             |
|---------------------------|-------------------|-------------------|-------------------|-------------------|-------------------|-------------------|-------------|
| P for trend               | <0.001            | <0.001            | 0.004             | 0.006             | 0.02              | 0.02              | 264         |
| Activity score (per unit) | 2.1<br>(1.4, 2.7) | 2.0<br>(1.4, 2.7) | 2.6<br>(1.7, 3.4) | 2.5<br>(1.6, 3.4) | 1.6<br>(0.8, 2.3) | 1.6<br>(0.8, 2.3) | 0.06<br>265 |

\*MVPA Moderate-to-vigorous physical activity; Model 1 is adjusted for age and gender; Model 2 is additionally adjusted for BMI and IMD score

For peer review only

1  
2  
3 267 The associations of activity variables with achievement of the hour per day government  
4  
5 268 guideline in the multiple imputation data are shown in Table 4. A higher frequency of  
6  
7 269 participation in any of the activities, or an increase in the overall activity score, was  
8  
9  
10 270 associated with increased odds of meeting the government guideline in both models.  
11  
12 271 Associations were similar in girls and boys. A unit increase in the activity score was  
13  
14 272 associated with around an 18% increase in the odds of achieving 60 minutes of MVPA per  
15  
16 273 day. Findings were unchanged when restricting to those with complete data (Table S6).  
17  
18  
19  
20  
21  
22  
23  
24  
25  
26  
27  
28  
29  
30  
31  
32  
33  
34  
35  
36  
37  
38  
39  
40  
41  
42  
43  
44  
45  
46  
47  
48  
49  
50  
51  
52  
53  
54  
55  
56  
57  
58  
59  
60

Table 4 Odds ratios for achieving 60 minutes of MVPA per day associated with different activities using multiple imputation (N=1223)\*

| Exposure                                                      |               | Meeting government guideline: odds ratio (95% confidence interval) |                      |                      |                      |                      |                      | P for gender interaction |
|---------------------------------------------------------------|---------------|--------------------------------------------------------------------|----------------------|----------------------|----------------------|----------------------|----------------------|--------------------------|
|                                                               |               | All (N=1223)                                                       |                      | Boys (N=556)         |                      | Girls (N=667)        |                      |                          |
|                                                               |               | Model 1                                                            | Model 2              | Model 1              | Model 2              | Model 1              | Model 2              |                          |
| Frequency child attends sport/exercise club at school         | Never (ref)   | 1                                                                  | 1                    | 1                    | 1                    | 1                    | 1                    | 0.34                     |
|                                                               | 1-2 days/week | 1.33<br>(0.98, 1.81)                                               | 1.31<br>(0.97, 1.78) | 1.10<br>(0.65, 1.86) | 1.07<br>(0.63, 1.81) | 1.54<br>(1.06, 2.23) | 1.54<br>(1.07, 2.21) |                          |
|                                                               | 3-4 days/week | 1.87<br>(1.16, 3.01)                                               | 1.83<br>(1.14, 2.93) | 2.22<br>(1.09, 4.53) | 2.14<br>(1.04, 4.40) | 1.63<br>(0.94, 2.85) | 1.63<br>(0.94, 2.82) |                          |
|                                                               | 5 days/week   | 1.69<br>(1.03, 2.78)                                               | 1.67<br>(1.02, 2.76) | 1.61<br>(0.83, 3.09) | 1.55<br>(0.79, 3.02) | 1.76<br>(0.84, 3.69) | 1.77<br>(0.84, 3.73) |                          |
| P for trend                                                   |               | 0.01                                                               | 0.01                 | 0.03                 | 0.05                 | 0.05                 | 0.05                 |                          |
| Frequency child attends sport/exercise club outside of school | Never (ref)   | 1                                                                  | 1                    | 1                    | 1                    | 1                    | 1                    | 0.93                     |
|                                                               | 1-2 days/week | 1.14<br>(0.80, 1.64)                                               | 1.13<br>(0.77, 1.64) | 1.21<br>(0.74, 1.98) | 1.18<br>(0.70, 1.99) | 1.11<br>(0.68, 1.80) | 1.12<br>(0.69, 1.82) |                          |
|                                                               | 3-4 days/week | 1.82<br>(1.22, 2.72)                                               | 1.75<br>(1.16, 2.65) | 2.07<br>(1.11, 3.87) | 1.95<br>(1.03, 3.67) | 1.66<br>(0.99, 2.78) | 1.69<br>(1.01, 2.83) |                          |
|                                                               | 5 days/week   | 2.70<br>(1.57, 4.62)                                               | 2.63<br>(1.51, 4.58) | 3.24<br>(1.49, 7.07) | 3.15<br>(1.41, 7.06) | 2.30<br>(1.12, 4.72) | 2.33<br>(1.14, 4.77) |                          |
| P for trend                                                   |               | <0.001                                                             | <0.001               | <0.001               | 0.001                | 0.009                | 0.008                |                          |
| Frequency child plays with friends/family outside near home   | Never (ref)   | 1                                                                  | 1                    | 1                    | 1                    | 1                    | 1                    | 0.74                     |
|                                                               | 1-2 days/week | 1.15<br>(0.70, 1.88)                                               | 1.12<br>(0.69, 1.82) | 0.98<br>(0.46, 2.09) | 0.94<br>(0.43, 2.06) | 1.47<br>(0.62, 3.45) | 1.47<br>(0.63, 3.43) |                          |
|                                                               | 3-4 days/week | 1.88<br>(1.12, 3.16)                                               | 1.84<br>(1.11, 3.06) | 1.62<br>(0.73, 3.58) | 1.59<br>(0.70, 3.58) | 2.32<br>(0.91, 5.91) | 2.32<br>(0.92, 5.88) |                          |
|                                                               | 5 days/week   | 2.11<br>(1.26, 3.52)                                               | 2.10<br>(1.26, 3.49) | 2.08<br>(0.92, 4.69) | 2.07<br>(0.91, 4.74) | 2.35<br>(0.93, 5.99) | 2.36<br>(0.93, 6.02) |                          |
| P for trend                                                   |               | <0.001                                                             | <0.001               | 0.003                | 0.002                | 0.01                 | 0.02                 |                          |
| Frequency child plays with friends/family in home/garden      | Never (ref)   | 1                                                                  | 1                    | 1                    | 1                    | 1                    | 1                    | 0.21                     |
|                                                               | 1-2 days/week | 1.27<br>(0.84, 1.91)                                               | 1.23<br>(0.81, 1.86) | 0.94<br>(0.52, 1.72) | 0.90<br>(0.49, 1.64) | 1.75<br>(0.84, 3.64) | 1.75<br>(0.84, 3.65) |                          |
|                                                               | 3-4 days/week | 1.51<br>(1.00, 2.28)                                               | 1.46<br>(0.96, 2.23) | 1.29<br>(0.70, 2.40) | 1.28<br>(0.68, 2.44) | 1.80<br>(0.86, 3.80) | 1.80<br>(0.86, 3.79) |                          |
|                                                               | 5 days/week   | 1.71<br>(1.14, 2.56)                                               | 1.67<br>(1.11, 2.53) | 1.71<br>(0.90, 3.25) | 1.62<br>(0.83, 3.14) | 1.80<br>(0.88, 3.69) | 1.81<br>(0.88, 3.70) |                          |

|                           |                      |                      |                      |                      |                      |                      |             |
|---------------------------|----------------------|----------------------|----------------------|----------------------|----------------------|----------------------|-------------|
| P for trend               | 0.005                | 0.006                | 0.01                 | 0.02                 | 0.21                 | 0.21                 | 275         |
| Activity score (per unit) | 1.18<br>(1.12, 1.25) | 1.18<br>(1.11, 1.25) | 1.21<br>(1.12, 1.30) | 1.20<br>(1.11, 1.30) | 1.16<br>(1.07, 1.25) | 1.16<br>(1.07, 1.25) | 0.52<br>276 |

\* MVPA Moderate-to-vigorous physical activity; Model 1 is adjusted for age and gender; Model 2 is additionally adjusted for BMI and IMD score

For peer review only

1  
2  
3 278 *Sensitivity Analysis*  
4

5 279 When we changed the inclusion criteria for accelerometer measures from three to one valid  
6  
7 280 day, findings were largely unchanged, except that boys showed a stronger association  
8  
9 281 between sport/exercise club attendance at their school and MVPA than girls (p for interaction  
10  
11 282 = 0.03 in multiple imputation data).  
12  
13

14 283

15  
16 284 **DISCUSSION**  
17

18 285 The findings demonstrate that increased participation in organised physical activity at school  
19  
20 286 and in the community are associated with greater overall physical activity and reduced  
21  
22 287 sedentary time among both boys and girls. Specifically, a child who attends a school-based  
23  
24 288 club 3-4 days per week obtained 7.8 more minutes of MVPA per day than a child who did not  
25  
26 289 attend at all, with attendance of five days a week at a sport/exercise club outside of school  
27  
28 290 associated with 10.9 more minutes of MVPA than children who never attended clubs. There  
29  
30 291 were comparable patterns for engagement in non-organised activity at home or in the  
31  
32 292 neighbourhood, both were associated with increased MVPA, but only activity outside of the  
33  
34 293 home was associated with reduced sedentary time. When the four different contexts of  
35  
36 294 physical activity were combined, the analyses showed that each additional 1-2 activities  
37  
38 295 participated in per week increased the odds of meeting the Chief Medical Officers'  
39  
40 296 recommendation of 60 minutes of MVPA per day by 18%. Thus, encouraging children to  
41  
42 297 attend after-school and community-based physical activity clubs, as well as to play at home  
43  
44 298 and in the neighbourhood is critical for helping children to increase MVPA. Moreover, in  
45  
46 299 light of the relative consistency in findings for each of the four forms of physical activity, the  
47  
48 300 message to parents should be that physical activity can be accumulated in all four settings  
49  
50 301 which allows them to find a balance that works for their family. For some families with  
51  
52 302 working parents, after-school programmes may be the key activity to focus on, whereas for  
53  
54  
55  
56  
57  
58  
59  
60

1  
2  
3 303 other families encouraging children to play in the neighbourhood is likely to be useful for  
4  
5 304 maximising physical activity. Furthermore, as there was little evidence that play at home was  
6  
7 305 associated with a reduction in sedentary time, it is also important to examine ways of  
8  
9  
10 306 encouraging non-sedentary activities within the home.

11 307

12  
13  
14 308 The findings in this paper support previous research which has shown that introducing extra-  
15  
16 309 curricular clubs into the school day can promote increased physical activity among primary  
17  
18 310 school-aged children.[32] The study is in broad agreement with the body of work, which has  
19  
20 311 shown that risky outdoor play and higher independent mobility are associated with higher  
21  
22 312 levels of physical activity among children.[33-36] These findings complement these bodies of  
23  
24 313 work by showing an additional effect of accumulating physical activity across different  
25  
26 314 settings to maximise the overall amount of physical activity in which children engage.  
27  
28  
29

30 315

31  
32 316 The UK Childhood Obesity strategy recommends that all primary schools should provide at  
33  
34 317 least 30 minutes per day of physical activity opportunities across the curriculum, break times  
35  
36 318 and extra-curricular activities.[37] The data presented here show that in the imputed dataset  
37  
38 319 72.2% of Year 4 children were attending school-based programmes at least once per week  
39  
40 320 and 10.5% were attending five days per week. Previous research has shown that in the UK,  
41  
42 321 after-school clubs for primary school children tend to be dominated by team sports, such as  
43  
44 322 football and rugby, with limited provision for non-competitive physical activities.[38] Thus,  
45  
46 323 increasing the number and variety of sessions that children attend and improving the quality  
47  
48 324 of those sessions is likely to provide a cost effective means of increasing children's physical  
49  
50 325 activity. This hypothesis is consistent with the recent Theory of Expanded, Extended and  
51  
52 326 Enhanced Opportunities (TEO), which suggests that the most effective means of increasing  
53  
54 327 children's physical activity will be provided by extending and expanding current  
55  
56  
57  
58  
59  
60



1  
2  
3 328 provision.[19] Thus, schools and community groups should be encouraged to extend current  
4  
5 329 after-school provision to more children, diversify the activities to interest more pupils  
6  
7 330 (preferably involving pupils in deciding what activities to offer), and enhance the quality of  
8  
9 331 provision to maximise the amount of activity obtained. These relatively simple changes could  
10  
11 332 be made at each school and would provide scalable ways for increasing overall levels of  
12  
13 333 physical activity and contributing to the UK government's goal of reducing the prevalence of  
14  
15 334 childhood obesity.  
16  
17  
18  
19

335

### 336 *Strengths and limitations*

337 The major strength of this study is the large sample size and provision of detailed information  
338 about participation in four different physical activity settings alongside accelerometer-  
339 assessed physical activity. In addition, the use of multiple imputation models to provide  
340 estimates for participants with missing data using a robust methodology has enabled us to  
341 maximise the sample for analysis. The study is limited by the cross-sectional design, which  
342 limits the ability to infer causation between frequency of participation in different settings  
343 and levels of physical activity. All questions were self-reported and it is possible that some  
344 were recalled more accurately than others. Moreover, as the questions used were developed  
345 for this project we do not have information on the reliability and validity of the scale. The  
346 report of play within the home is likely to include both sedentary and physically active forms  
347 of play, as the question included play indoors, which could be expected to be more sedentary,  
348 as well as outdoors in the garden, which is likely to be more active. Equally, as the question  
349 focussed on play with friends or family we do not have any information about individual  
350 play, and we were unable to disentangle these inter-related issues. We also cannot rule out the  
351 possibility of residual confounding, but have adjusted for several key potential confounding

1  
2  
3 352 variables in order to minimise this. The study is also drawn from the greater Bristol area in  
4  
5 353 the UK and as such our ability to extend findings to other settings and countries is limited.  
6  
7  
8 354

9  
10 355 **CONCLUSIONS**

11 356 Participation in organised physical activity at school and in the community is associated with  
12  
13  
14 357 greater physical activity and reduced sedentary time among both boys and girls. In light of  
15  
16 358 the challenges of promoting physical activity during school time, parents should encourage  
17  
18 359 children to attend after school clubs, attend community activity groups and play in the  
19  
20 360 neighbourhood to help their children to meet physical activity guidelines. The data show that  
21  
22 361 all four types of activity contribute similarly to overall physical activity and there is therefore  
23  
24 362 an opportunity for families to find the best mix of options for them.  
25  
26  
27 363

28  
29 364 **ACKNOWLEDGEMENTS**

30  
31 365 This work was supported by grants from the British Heart Foundation (ref PG/11/51/28986  
32  
33 366 and SP 14/4/31123). DAL works in a unit that receives funding from the University of Bristol  
34  
35 367 and UK Medical Research Council (MC\_UU\_1201/5); she is also a UK National Institute of  
36  
37 368 Health and Research Senior Investigator (NF-SI-0166-10196). The funders had no  
38  
39 369 involvement in data analysis, data interpretation or writing of the paper.  
40  
41  
42

43 370 We would like to thank all of the families and schools that have taken part in the B-  
44  
45 371 PROACTIV project. We would also like to thank all current and previous members of the  
46  
47 372 research team who are not authors on this paper.  
48  
49

50 373

51  
52 374 **COMPETING INTERESTS**

53  
54 375 All authors have completed the ICMJE uniform disclosure form at  
55  
56 376 [www.icmje.org/doi\\_disclosure.pdf](http://www.icmje.org/doi_disclosure.pdf) and declare: all authors had financial support from the  
57  
58  
59  
60

1  
2  
3 377 British Heart Foundation for the submitted work; no financial relationships with any  
4  
5 378 organisations that might have an interest in the submitted work in the previous three years; no  
6  
7 379 other relationships or activities that could appear to have influenced the submitted work.  
8  
9

10 380

11  
12 381 **CONTRIBUTORS**

13  
14 382 Conception / design: RJ, ESM, JLT, DAL and SJS.

15  
16 383 Data analysis / acquisition/ interpretation: RJ, CMW, ESM and DAL

17  
18 384 Drafting / revising critically for important content: All authors.

19  
20 385 Final approval: All authors.

21  
22 386 Accountability for study and manuscript: RJ.

23  
24  
25  
26 387

27  
28 388 **DATA SHARING STATEMENT:** The datasets generated during the current study are not  
29  
30 389 publicly available as the project is ongoing and data are not ready for archiving. We will  
31  
32 390 consider reasonable requests for access to the data once the project is complete in 2019.  
33

34  
35 391

36  
37 392 **REFERENCES**

38  
39 393 1. Strong WB, Malina RM, Blimkie CJ, et al. Evidence based physical activity for school-age  
40  
41 394 youth. *J Pediatr* 2005;**146**(6):732-7

42  
43 395 2. Carson V, Hunter S, Kuzik N, et al. Systematic review of sedentary behaviour and health  
44  
45 396 indicators in school-aged children and youth: an update. *Applied physiology,*  
46  
47 397 *nutrition, and metabolism = Physiologie appliquee, nutrition et metabolisme*  
48  
49 398 *2016*;**41**(6 Suppl 3):S240-65 doi: 10.1139/apnm-2015-0630[published Online First:  
50  
51 399 Epub Date]].  
52  
53  
54  
55  
56  
57  
58  
59  
60

- 1  
2  
3 400 3. Ekelund U, Luan J, Sherar LB, et al. Moderate to vigorous physical activity and sedentary  
4  
5 401 time and cardiometabolic risk factors in children and adolescents. *JAMA*  
6  
7 402 2012;**307**(7):704-12 doi: 10.1001/jama.2012.156[published Online First: Epub Date]].  
8  
9  
10 403 4. Ekelund U, Steene-Johannessen J, Brown WJ, et al. Does physical activity attenuate, or  
11  
12 404 even eliminate, the detrimental association of sitting time with mortality? A  
13  
14 405 harmonised meta-analysis of data from more than 1 million men and women. *Lancet*  
15  
16 406 2016;**388**(10051):1302-10 doi: 10.1016/S0140-6736(16)30370-1[published Online  
17  
18 407 First: Epub Date]].  
19  
20  
21 408 5. Department of Health PA, Health Improvement and Protection,. Start Active, Stay Active:  
22  
23 409 A report on physical activity from the four home countries' Chief Medical Officers.  
24  
25 410 London, 2011.  
26  
27  
28 411 6. Cooper AR, Goodman A, Page AS, et al. Objectively measured physical activity and  
29  
30 412 sedentary time in youth: the International children's accelerometry database (ICAD).  
31  
32 413 *Int J Behav Nutr Phys Act* 2015;**12**:113 doi: 10.1186/s12966-015-0274-5[published  
33  
34 414 Online First: Epub Date]].  
35  
36  
37 415 7. Griffiths LJ, Cortina-Borja M, Sera F, et al. How active are our children? Findings from  
38  
39 416 the Millennium Cohort Study. *BMJ open* 2013;**3**(8):e002893 doi: 10.1136/bmjopen-  
40  
41 417 2013-002893[published Online First: Epub Date]].  
42  
43 418 8. Nader PR, Bradley RH, Houts RM, McRitchie SL, O'Brien M. Moderate-to-vigorous  
44  
45 419 physical activity from ages 9 to 15 years. *JAMA* 2008;**300**(3):295-305  
46  
47  
48 420 9. Biddle SJ, Pearson N, Ross GM, Braithwaite R. Tracking of sedentary behaviours of  
49  
50 421 young people: A systematic review. *Prev Med* 2010;**51**:345-51  
51  
52 422 10. Farooq MA, Parkinson KN, Adamson AJ, et al. Timing of the decline in physical activity  
53  
54 423 in childhood and adolescence: Gateshead Millennium Cohort Study. *Br J Sports Med*  
55  
56 424 2017:1-6 doi: doi:10.1136/bjsports-2016-096933[published Online First: Epub Date]].  
57  
58  
59  
60

- 1  
2  
3 425 11. Jago R, Solomon-Moore E, McDonald-Wallis C, Sebire SJ, Thompson JL, Lawlor DA.  
4  
5 426 Change in children's physical activity and sedentary time between Year 1 and Year 4  
6  
7 427 of primary school in the B-PROACTIV cohort. *Int J Behav Nutr Phys Act* In Press  
8  
9  
10 428 12. Metcalf B, Henley W, Wilkin T. Effectiveness of intervention on physical activity of  
11  
12 429 children: systematic review and meta-analysis of controlled trials with objectively  
13  
14 430 measured outcomes (EarlyBird 54). *BMJ* 2012;**345**:e5888 doi:  
15  
16 431 10.1136/bmj.e5888[published Online First: Epub Date]].  
17  
18  
19 432 13. van Sluijs EM, McMinn AM, Griffin SJ. Effectiveness of interventions to promote  
20  
21 433 physical activity in children and adolescents: systematic review of controlled trials.  
22  
23 434 *BMJ* 2007;**335**(7622):703  
24  
25 435 14. Kipping R, Payne C, Lawlor DA. Randomised controlled trial adapting American school  
26  
27 436 obesity prevention to England. *Arch Dis Child* 2008  
28  
29  
30 437 15. McGoey T, Root Z, Bruner MW, Law B. Evaluation of physical activity interventions in  
31  
32 438 children via the reach, efficacy/effectiveness, adoption, implementation, and  
33  
34 439 maintenance (RE-AIM) framework: A systematic review of randomized and non-  
35  
36 440 randomized trials. *Prev Med* 2016;**82**:8-19 doi:  
37  
38 441 10.1016/j.ypmed.2015.11.004[published Online First: Epub Date]].  
39  
40  
41 442 16. Arundell L, Fletcher E, Salmon J, Veitch J, Hinkley T. A systematic review of the  
42  
43 443 prevalence of sedentary behavior during the after-school period among children aged  
44  
45 444 5-18 years. *Int J Behav Nutr Phys Act* 2016;**13**:93 doi: 10.1186/s12966-016-0419-  
46  
47 445 1[published Online First: Epub Date]].  
48  
49  
50 446 17. Jago R, Rawlins E, Kipping RR, et al. Lessons learned from the AFLY5 RCT process  
51  
52 447 evaluation: implications for the design of physical activity and nutrition interventions  
53  
54 448 in schools. *BMC Public Health* 2015;**15**:946 doi: 10.1186/s12889-015-2293-  
55  
56 449 1[published Online First: Epub Date]].  
57  
58  
59  
60

- 1  
2  
3 450 18. Beets MW, Beighle A, Erwin HE, Huberty JL. After-school program impact on physical  
4  
5 451 activity and fitness: a meta-analysis. *Am J Prev Med* 2009;**36**(6):527-37 doi:  
6  
7 452 10.1016/j.amepre.2009.01.033[published Online First: Epub Date]].  
8  
9  
10 453 19. Beets MW, Okely A, Weaver RG, et al. The theory of expanded, extended, and enhanced  
11  
12 454 opportunities for youth physical activity promotion. *Int J Behav Nutr Phys Act*  
13  
14 455 2016;**13**(1):120 doi: 10.1186/s12966-016-0442-2[published Online First: Epub Date]].  
15  
16 456 20. Beets MW, Weaver RG, Turner-McGrievy G, et al. Physical activity outcomes in  
17  
18 457 afterschool programs: A group randomized controlled trial. *Prev Med* 2016;**90**:207-15  
19  
20 458 doi: 10.1016/j.ypmed.2016.07.002[published Online First: Epub Date]].  
21  
22  
23 459 21. Weaver RG, Beets MW, Huberty J, Freedman D, Turner-McGrievy G, Ward D. Physical  
24  
25 460 activity opportunities in afterschool programs. *Health promotion practice*  
26  
27 461 2015;**16**(3):371-82 doi: 10.1177/1524839914567740[published Online First: Epub  
28  
29 462 Date]].  
30  
31  
32 463 22. Jago R, Sebire SJ, Wood L, et al. Associations between objectively assessed child and  
33  
34 464 parental physical activity: a cross-sectional study of families with 5-6 year old  
35  
36 465 children. *BMC Public Health* 2014;**14**:655 doi: 10.1186/1471-2458-14-655[published  
37  
38 466 Online First: Epub Date]].  
39  
40  
41 467 23. Jago R, Thompson JL, Sebire SJ, et al. Cross-sectional associations between the screen-  
42  
43 468 time of parents and young children: differences by parent and child gender and day of  
44  
45 469 the week. *Int J Behav Nutr Phys Act* 2014;**11**:54 doi: 10.1186/1479-5868-11-  
46  
47 470 54[published Online First: Epub Date]].  
48  
49  
50 471 24. Cole TJ, Bellizzi MC, Flegal KM, Dietz WH. Establishing a standard definition for child  
51  
52 472 overweight and obesity worldwide: international survey. *BMJ* 2000;**320**(7244):1240-3  
53  
54 473 25. Cole TJ, Freeman JV, Preece MA. Body mass index reference curves for the UK, 1990.  
55  
56 474 *Arch Dis Child* 1995;**73**(1):25-9  
57  
58  
59  
60

- 1  
2  
3 475 26. Cain KL, Sallis JF, Conway TL, Van Dyck D, Calhoun L. Using accelerometers in youth  
4  
5 476 physical activity studies: a review of methods. *J Phys Act Health* 2013;**10**(3):437-50  
6  
7 477 27. Basterfield L, Adamson AJ, Pearce MS, Reilly JJ. Stability of habitual physical activity  
8  
9 478 and sedentary behavior monitoring by accelerometry in 6- to 8-year-olds. *J Phys Act*  
10  
11 479 *Health* 2011;**8**(4):543-7  
12  
13 480 28. Jago R, Baranowski T, Baranowski J, et al. Fit for life Boy Scout badge: Outcome  
14  
15 481 Evaluation of a troop & internet intervention. *Prev Med* 2006;**42**:181-87  
16  
17 482 29. Jago R, Baranowski T, Baranowski JC. Observed, GIS, and self-reported environmental  
18  
19 483 features and adolescent physical activity. *Am J Health Promot* 2006;**20**(6):422-8  
20  
21 484 30. Evenson KR, Catellier DJ, Gill K, Ondrak KS, McMurray RG. Calibration of two  
22  
23 485 objective measures of physical activity for children. *Journal of sports sciences*  
24  
25 486 2008;**26**(14):1557-65  
26  
27 487 31. Rubin DB. Multiple imputation after 18+ years. *Journal of the American Statistical*  
28  
29 488 *Association* 1996;**91**(434):473-789  
30  
31 489 32. Mears R, Jago R. Effectiveness of after-school interventions at increasing moderate-to-  
32  
33 490 vigorous physical activity levels in 5- to 18-year olds: a systematic review and meta-  
34  
35 491 analysis. *Br J Sports Med* 2016 doi: 10.1136/bjsports-2015-094976[published Online  
36  
37 492 First: Epub Date]].  
38  
39 493 33. Brussoni M, Gibbons R, Gray C, et al. What is the Relationship between Risky Outdoor  
40  
41 494 Play and Health in Children? A Systematic Review. *Int J Environ Res Public Health*  
42  
43 495 2015;**12**(6):6423-54 doi: 10.3390/ijerph120606423[published Online First: Epub  
44  
45 496 Date]].  
46  
47 497 34. Tremblay MS, Gray C, Babcock S, et al. Position Statement on Active Outdoor Play. *Int J*  
48  
49 498 *Environ Res Public Health* 2015;**12**(6):6475-505 doi:  
50  
51 499 10.3390/ijerph120606475[published Online First: Epub Date]].  
52  
53  
54  
55  
56  
57  
58  
59  
60

- 1  
2  
3 500 35. Page A, Cooper A, Griew P, Davis L, Hillsdon M. Independent mobility in relation to  
4  
5 501 weekday and weekend physical activity in children aged 10-11 years: The PEACH  
6  
7 502 Project. *Int J Behav Nutr Phys Act* 2009;6:2  
8  
9  
10 503 36. Page AS, Cooper AR, Griew P, Jago R. Independent mobility, perceptions of the built  
11  
12 504 environment and children's participation in play, active travel and structured exercise  
13  
14 505 and sport: the PEACH Project. *Int J Behav Nutr Phys Act* 2010;7:17  
15  
16 506 37. Cabinet Office. Childhood obesity: a plan for action. In: Prime Minister's Office DS, ed.  
17  
18 507 London: Prime Minister's Office, 10 Downing Street, 2017.  
19  
20  
21 508 38. Davies B, Wood L, Banfield K, Edwards MJ, Jago R. The provision of active after-school  
22  
23 509 clubs for children in English primary schools: implications for increasing children's  
24  
25 510 physical activity. *Open Journal of Preventive Medicine* 2014;4:598-605 doi:  
26  
27 511 <http://dx.doi.org/10.4236/ojpm.2014.47069>[published Online First: Epub Date]].  
28  
29  
30  
31  
32

33 **Figure 1 Predicted time spent in sedentary behaviour by type of activity using multiple**  
34 **imputation (N=1223)\***

35  
36 515 \* Predictions were obtained from fully adjusted regression models (Model 2) including all  
37 516 Year 4 children (boys and girls) and are for a 9-year old boy with a BMI z-score of 0 and  
38 517 IMD score of 16. Predicted sedentary time for girls was approximately 15-17 mins/day higher  
39 518 (same additive effect across all categories of the exposure variable) depending on the  
40 519 regression model  
41  
42  
43  
44

45 **Figure 2 Predicted time spent in moderate-to-vigorous physical activity by type of**  
46 **activity using multiple imputation (N=1223)\***

47  
48 523 \* Predictions were obtained from fully adjusted regression models (Model 2) including all  
49 524 Year 4 children (boys and girls) and are for a 9-year old boy with a BMI z-score of 0 and  
50 525 IMD score of 16. Predicted time spent in moderate-to-vigorous physical activity for girls was  
51 526 approximately 13 mins/day lower (same additive effect across all categories of the exposure  
52 527 variable)  
53  
54  
55  
56  
57  
58  
59  
60



1  
2  
3  
4  
5  
6  
7  
8  
9  
10  
11  
12  
13  
14  
15  
16  
17  
18  
19  
20  
21  
22  
23  
24  
25  
26  
27  
28  
29  
30  
31  
32  
33  
34  
35  
36  
37  
38  
39  
40  
41  
42  
43  
44  
45  
46  
47  
48  
49  
50  
51  
52  
53  
54  
55  
56  
57  
58  
59  
60

For peer review only

## Organised physical activity, neighbourhood play and child physical activity

STROBE Statement—checklist of items that should be included in reports of observational studies

|                              | Item No | Recommendation                                                                                                                                                                                                                                                                                                                                                                                                                                                                       |
|------------------------------|---------|--------------------------------------------------------------------------------------------------------------------------------------------------------------------------------------------------------------------------------------------------------------------------------------------------------------------------------------------------------------------------------------------------------------------------------------------------------------------------------------|
| Title and abstract           | 1       | (a) Indicate the study's design with a commonly used term in the title or the abstract<br><b>Title Page</b>                                                                                                                                                                                                                                                                                                                                                                          |
|                              |         | (b) Provide in the abstract an informative and balanced summary of what was done and what was found – <b>Pages 2-3</b>                                                                                                                                                                                                                                                                                                                                                               |
| <b>Introduction</b>          |         |                                                                                                                                                                                                                                                                                                                                                                                                                                                                                      |
| Background/rationale         | 2       | Explain the scientific background and rationale for the investigation being reported – <b>Pages 5-6</b>                                                                                                                                                                                                                                                                                                                                                                              |
| Objectives                   | 3       | State specific objectives, including any prespecified hypotheses – <b>Page 6.</b>                                                                                                                                                                                                                                                                                                                                                                                                    |
| <b>Methods</b>               |         |                                                                                                                                                                                                                                                                                                                                                                                                                                                                                      |
| Study design                 | 4       | Present key elements of study design early in the paper <b>Pages 6-7.</b>                                                                                                                                                                                                                                                                                                                                                                                                            |
| Setting                      | 5       | Describe the setting, locations, and relevant dates, including periods of recruitment, exposure, follow-up, and data collection <b>Page 6.</b>                                                                                                                                                                                                                                                                                                                                       |
| Participants                 | 6       | (a) <i>Cohort study</i> —Give the eligibility criteria, and the sources and methods of selection of participants. Describe methods of follow-up<br><i>Case-control study</i> —Give the eligibility criteria, and the sources and methods of case ascertainment and control selection. Give the rationale for the choice of cases and controls<br><i>Cross-sectional study</i> —Give the eligibility criteria, and the sources and methods of selection of participants <b>Page 7</b> |
|                              |         | (b) <i>Cohort study</i> —For matched studies, give matching criteria and number of exposed and unexposed<br><i>Case-control study</i> —For matched studies, give matching criteria and the number of controls per case                                                                                                                                                                                                                                                               |
| Variables                    | 7       | Clearly define all outcomes, exposures, predictors, potential confounders, and effect modifiers. Give diagnostic criteria, if applicable - <b>Page 7-8</b>                                                                                                                                                                                                                                                                                                                           |
| Data sources/<br>measurement | 8*      | For each variable of interest, give sources of data and details of methods of assessment (measurement). Describe comparability of assessment methods if there is more than one group <b>Page 7-8</b>                                                                                                                                                                                                                                                                                 |
| Bias                         | 9       | Describe any efforts to address potential sources of bias – <b>Page 8</b>                                                                                                                                                                                                                                                                                                                                                                                                            |
| Study size                   | 10      | Explain how the study size was arrived at - <b>Page 8</b>                                                                                                                                                                                                                                                                                                                                                                                                                            |
| Quantitative variables       | 11      | Explain how quantitative variables were handled in the analyses. If applicable, describe which groupings were chosen and why - <b>Pages 8-9</b>                                                                                                                                                                                                                                                                                                                                      |
| Statistical methods          | 12      | (a) Describe all statistical methods, including those used to control for confounding – <b>Pages 8-9</b>                                                                                                                                                                                                                                                                                                                                                                             |
|                              |         | (b) Describe any methods used to examine subgroups and interactions – <b>Pages 8-9</b>                                                                                                                                                                                                                                                                                                                                                                                               |
|                              |         | (c) Explain how missing data were addressed - <b>Pages 8-9</b>                                                                                                                                                                                                                                                                                                                                                                                                                       |
|                              |         | (d) <i>Cohort study</i> —If applicable, explain how loss to follow-up was addressed<br><i>Case-control study</i> —If applicable, explain how matching of cases and controls was addressed<br><i>Cross-sectional study</i> —If applicable, describe analytical methods taking account of                                                                                                                                                                                              |

1  
2  
3  
4  
5  
6  
7  
8  
9  
10  
11  
12  
13  
14  
15  
16  
17  
18  
19  
20  
21  
22  
23  
24  
25  
26  
27  
28  
29  
30  
31  
32  
33  
34  
35  
36  
37  
38  
39  
40  
41  
42  
43  
44  
45  
46  
47  
48  
49  
50  
51  
52  
53  
54  
55  
56  
57  
58  
59  
60

|  |  |                                                 |
|--|--|-------------------------------------------------|
|  |  | sampling strategy - Page 9                      |
|  |  | (e) Describe any sensitivity analyses – Page 10 |

Continued on next page

For peer review only

**Results**

|                  |     |                                                                                                                                                                                                                                                                                                                                                                                                                                                                                                              |
|------------------|-----|--------------------------------------------------------------------------------------------------------------------------------------------------------------------------------------------------------------------------------------------------------------------------------------------------------------------------------------------------------------------------------------------------------------------------------------------------------------------------------------------------------------|
| Participants     | 13* | (a) Report numbers of individuals at each stage of study—eg numbers potentially eligible, examined for eligibility, confirmed eligible, included in the study, completing follow-up, and analysed <a href="#">Table 1</a><br>(b) Give reasons for non-participation at each stage<br>(c) Consider use of a flow diagram - <a href="#">NA</a>                                                                                                                                                                 |
| Descriptive data | 14* | (a) Give characteristics of study participants (eg demographic, clinical, social) and information on exposures and potential confounders – <a href="#">Table 1</a><br>(b) Indicate number of participants with missing data for each variable of interest - <a href="#">Table 1</a><br>(c) <i>Cohort study</i> —Summarise follow-up time (eg, average and total amount)                                                                                                                                      |
| Outcome data     | 15* | <i>Cohort study</i> —Report numbers of outcome events or summary measures over time<br><i>Case-control study</i> —Report numbers in each exposure category, or summary measures of exposure<br><i>Cross-sectional study</i> —Report numbers of outcome events or summary measures <a href="#">Table 1</a>                                                                                                                                                                                                    |
| Main results     | 16  | (a) Give unadjusted estimates and, if applicable, confounder-adjusted estimates and their precision (eg, 95% confidence interval). Make clear which confounders were adjusted for and why they were included – <a href="#">Tables 2-4</a><br>(b) Report category boundaries when continuous variables were categorized - <a href="#">Tables 2-4</a><br>(c) If relevant, consider translating estimates of relative risk into absolute risk for a meaningful time period Discussion – <a href="#">Page 18</a> |
| Other analyses   | 17  | Report other analyses done—eg analyses of subgroups and interactions, and sensitivity analyses – <a href="#">Supplementary tables</a>                                                                                                                                                                                                                                                                                                                                                                        |

**Discussion**

|                  |    |                                                                                                                                                                                                      |
|------------------|----|------------------------------------------------------------------------------------------------------------------------------------------------------------------------------------------------------|
| Key results      | 18 | Summarise key results with reference to study objectives – <a href="#">Page 21</a>                                                                                                                   |
| Limitations      | 19 | Discuss limitations of the study, taking into account sources of potential bias or imprecision. Discuss both direction and magnitude of any potential bias - <a href="#">Page 23</a>                 |
| Interpretation   | 20 | Give a cautious overall interpretation of results considering objectives, limitations, multiplicity of analyses, results from similar studies, and other relevant evidence – <a href="#">Page 22</a> |
| Generalisability | 21 | Discuss the generalisability (external validity) of the study results <a href="#">Page 22</a>                                                                                                        |

**Other information**

|         |    |                                                                                                                                                                                         |
|---------|----|-----------------------------------------------------------------------------------------------------------------------------------------------------------------------------------------|
| Funding | 22 | Give the source of funding and the role of the funders for the present study and, if applicable, for the original study on which the present article is based – <a href="#">Page 24</a> |
|---------|----|-----------------------------------------------------------------------------------------------------------------------------------------------------------------------------------------|

\*Give information separately for cases and controls in case-control studies and, if applicable, for exposed and unexposed groups in cohort and cross-sectional studies.

**Note:** An Explanation and Elaboration article discusses each checklist item and gives methodological background and published examples of transparent reporting. The STROBE checklist is best used in conjunction with this article (freely available on the Web sites of PLoS Medicine at <http://www.plosmedicine.org/>, Annals of Internal Medicine at <http://www.annals.org/>, and Epidemiology at <http://www.epidem.com/>). Information on the STROBE Initiative is available at [www.strobe-statement.org](http://www.strobe-statement.org).

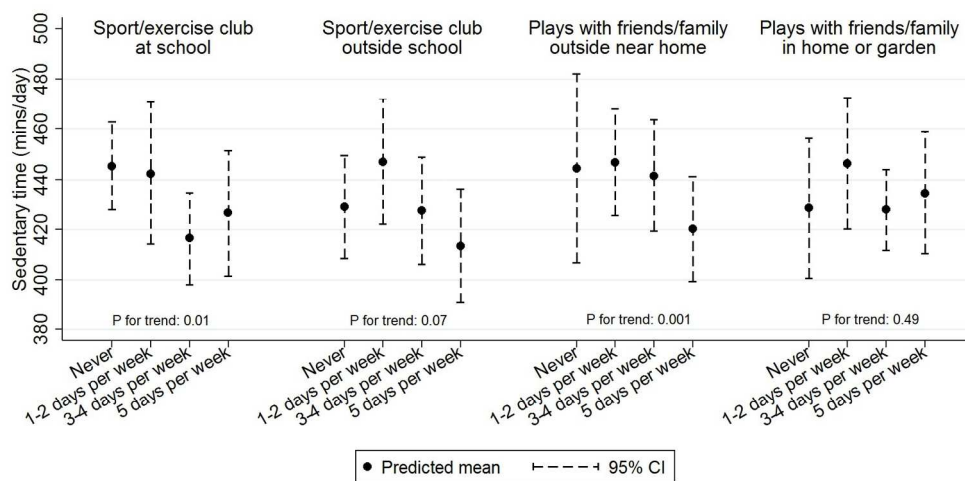

Figure 1 Predicted time spent in sedentary behaviour by type of activity using multiple imputation (N=1223)\*

\* Predictions were obtained from fully adjusted regression models (Model 2) including all Year 4 children (boys and girls) and are for a 9-year old boy with a BMI z-score of 0 and IMD score of 16. Predicted sedentary time for girls was approximately 15-17 mins/day higher (same additive effect across all categories of the exposure variable) depending on the regression model

159x79mm (300 x 300 DPI)

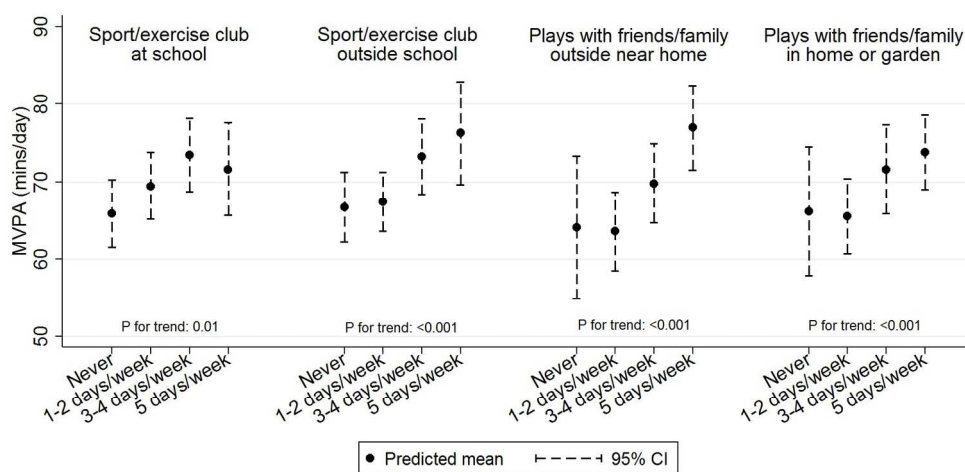

Figure 2 Predicted time spent in moderate-to-vigorous physical activity by type of activity using multiple imputation (N=1223)\*

\* Predictions were obtained from fully adjusted regression models (Model 2) including all Year 4 children (boys and girls) and are for a 9-year old boy with a BMI z-score of 0 and IMD score of 16. Predicted time spent in moderate-to-vigorous physical activity for girls was approximately 13 mins/day lower (same additive effect across all categories of the exposure variable)

159x79mm (300 x 300 DPI)

view only

Figure S1 Scatter plot of sedentary time by activity score in the observed data (N=1003)

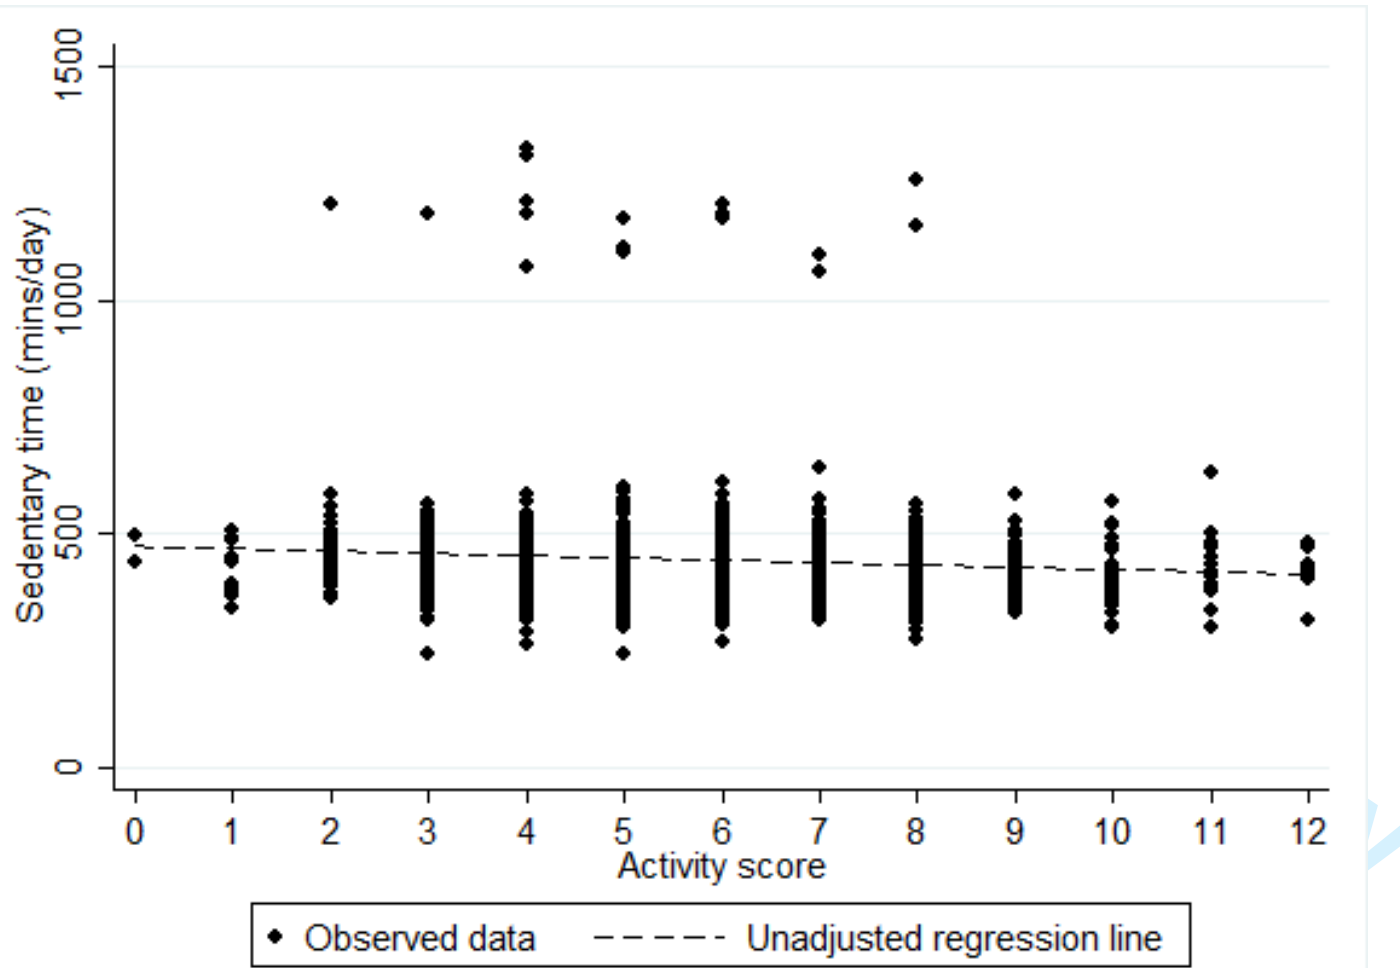

Figure S2 Scatter plot of time spent in moderate-to-vigorous physical activity by activity score in the observed data (N=1003)

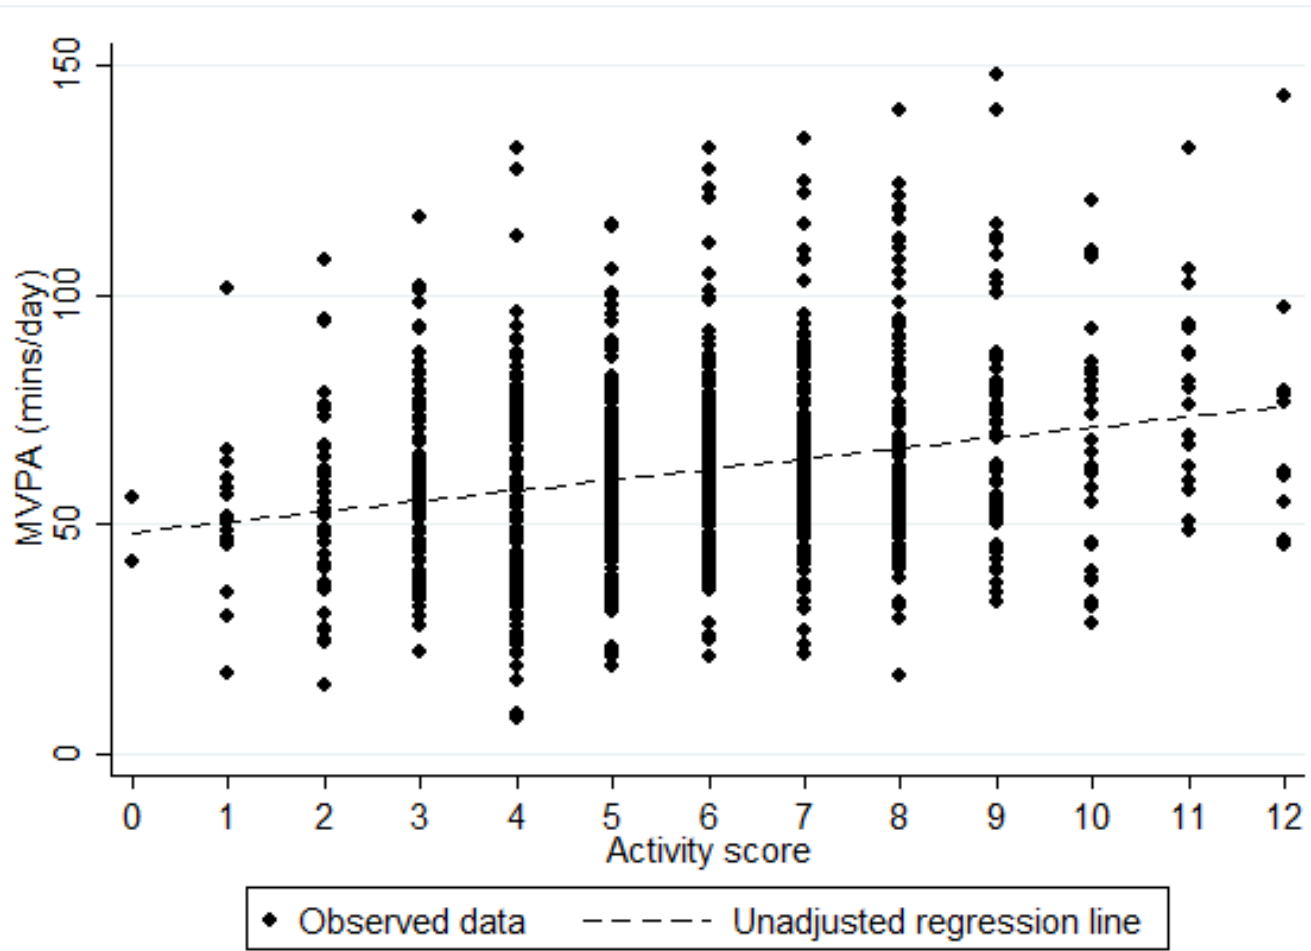



**Table S1 Frequencies of sport/exercise club attendance and play outside and inside the home and mean activity score by gender in the observed data**

|                                                                      |               | <b>Boys</b><br>N (%) |             | <b>Girls</b><br>N (%) |             | <b>Chi-squared p-value for association</b>  |
|----------------------------------------------------------------------|---------------|----------------------|-------------|-----------------------|-------------|---------------------------------------------|
| <b>Frequency child attends sport/exercise club at school</b>         | Never         | 144 (25.9)           |             | 194 (29.4)            |             | <0.001                                      |
|                                                                      | 1-2 days/week | 235 (42.3)           |             | 318 (48.2)            |             |                                             |
|                                                                      | 3-4 days/week | 90 (16.2)            |             | 106 (16.1)            |             |                                             |
|                                                                      | 5 days/week   | 86 (15.5)            |             | 42 (6.4)              |             |                                             |
| <b>Frequency child attends sport/exercise club outside of school</b> | Never         | 85 (15.3)            |             | 165 (25.0)            |             | <0.001                                      |
|                                                                      | 1-2 days/week | 289 (52.1)           |             | 321 (48.7)            |             |                                             |
|                                                                      | 3-4 days/week | 121 (21.8)           |             | 132 (20.0)            |             |                                             |
|                                                                      | 5 days/week   | 60 (10.8)            |             | 41 (6.2)              |             |                                             |
| <b>Frequency child plays with friends/family outside near home</b>   | Never         | 36 (6.6)             |             | 40 (6.1)              |             | 0.14                                        |
|                                                                      | 1-2 days/week | 187 (34.1)           |             | 219 (33.4)            |             |                                             |
|                                                                      | 3-4 days/week | 142 (25.9)           |             | 207 (31.6)            |             |                                             |
|                                                                      | 5 days/week   | 184 (33.5)           |             | 190 (29.0)            |             |                                             |
| <b>Frequency child plays with friends/family in home/garden</b>      | Never         | 53 (9.7)             |             | 62 (9.5)              |             | 0.76                                        |
|                                                                      | 1-2 days/week | 184 (33.7)           |             | 230 (35.2)            |             |                                             |
|                                                                      | 3-4 days/week | 142 (26.0)           |             | 179 (27.4)            |             |                                             |
|                                                                      | 5 days/week   | 167 (30.6)           |             | 182 (27.9)            |             |                                             |
|                                                                      |               | <b>Boys</b>          |             | <b>Girls</b>          |             | <b>T-test p-value for gender difference</b> |
|                                                                      |               | N                    | Mean (SD)   | N                     | Mean (SD)   |                                             |
| <b>Activity frequency score</b>                                      |               | 542                  | 6.15 (2.42) | 651                   | 5.65 (2.16) | <0.001                                      |

**Table S2 Child characteristics by frequencies of sport/exercise club attendance and play outside and inside the home and activity score in the observed data**

|                                                                      |                                            | Age (years) |         | BMI z score |         | IMD score     |         |
|----------------------------------------------------------------------|--------------------------------------------|-------------|---------|-------------|---------|---------------|---------|
|                                                                      |                                            | Mean (SD)   | N       | Mean (SD)   | N       | Mean (SD)     | N       |
| <b>Frequency child attends sport/exercise club at school</b>         | Never                                      | 9.03 (0.38) | 1215    | 0.43 (1.14) | 1202    | 17.30 (15.04) | 1197    |
|                                                                      | 1-2 days/week                              | 9.05 (0.43) |         | 0.35 (1.05) |         | 15.54 (14.02) |         |
|                                                                      | 3-4 days/week                              | 9.00 (0.45) |         | 0.29 (1.02) |         | 14.15 (11.07) |         |
|                                                                      | 5 days/week                                | 8.99 (0.39) |         | 0.27 (1.13) |         | 16.66 (15.10) |         |
|                                                                      | P-value for difference between categories* |             |         | 0.31        |         | 0.36          |         |
| <b>Frequency child attends sport/exercise club outside of school</b> | Never                                      | 9.01 (0.40) | 1214    | 0.47 (1.07) | 1201    | 20.03 (16.06) | 1196    |
|                                                                      | 1-2 days/week                              | 9.01 (0.43) |         | 0.37 (1.09) |         | 16.02 (14.12) |         |
|                                                                      | 3-4 days/week                              | 9.05 (0.41) |         | 0.23 (1.07) |         | 12.30 (10.25) |         |
|                                                                      | 5 days/week                                | 9.12 (0.39) |         | 0.30 (1.06) |         | 14.26 (13.64) |         |
|                                                                      | P-value for difference between categories* |             |         | 0.05        |         | 0.09          |         |
| <b>Frequency child plays with friends/family outside near home</b>   | Never                                      | 8.96 (0.47) | 1205    | 0.48 (1.24) | 1192    | 17.60 (16.02) | 1187    |
|                                                                      | 1-2 days/week                              | 9.01 (0.42) |         | 0.31 (1.06) |         | 15.20 (13.83) |         |
|                                                                      | 3-4 days/week                              | 9.05 (0.41) |         | 0.39 (1.07) |         | 14.66 (12.48) |         |
|                                                                      | 5 days/week                                | 9.05 (0.40) |         | 0.33 (1.08) |         | 17.66 (15.08) |         |
|                                                                      | P-value for difference between categories* |             |         | 0.23        |         | 0.58          |         |
| <b>Frequency child plays with friends/family in home/garden</b>      | Never                                      | 8.97 (0.38) | 1199    | 0.50 (1.11) | 1186    | 18.54 (15.94) | 1181    |
|                                                                      | 1-2 days/week                              | 9.02 (0.45) |         | 0.29 (1.09) |         | 15.85 (13.95) |         |
|                                                                      | 3-4 days/week                              | 9.06 (0.41) |         | 0.40 (1.07) |         | 14.24 (12.79) |         |
|                                                                      | 5 days/week                                | 9.03 (0.39) |         | 0.32 (1.07) |         | 16.85 (14.55) |         |
|                                                                      | P-value for difference between categories* |             |         | 0.31        |         | 0.23          |         |
|                                                                      |                                            | Correlation | P-value | Correlation | P-value | Correlation   | P-value |
| <b>Activity frequency score</b>                                      |                                            | 0.04        | 0.13    | -0.05       | 0.07    | -0.07         | 0.02    |

Table S3 Pairwise comparisons of children's activity attendance frequencies in the multiple imputation data (N=1223)\*

|                                                                      |                     | Frequency child attends sport/exercise club at school (%) |                     | Frequency child attends sport/exercise club outside of school (%) |                     | Frequency child plays with friends/family outside near home (%) |                     | Frequency child plays with friends/family in home/garden (%) |                     |
|----------------------------------------------------------------------|---------------------|-----------------------------------------------------------|---------------------|-------------------------------------------------------------------|---------------------|-----------------------------------------------------------------|---------------------|--------------------------------------------------------------|---------------------|
|                                                                      |                     | Up to 2 days/week                                         | 3 or more days/week | Up to 2 days/week                                                 | 3 or more days/week | Up to 2 days/week                                               | 3 or more days/week | Up to 2 days/week                                            | 3 or more days/week |
| <b>Frequency child attends sport/exercise club at school</b>         | Up to 2 days/week   |                                                           |                     | 76.3                                                              | 23.7                | 42.7                                                            | 57.3                | 47.3                                                         | 52.7                |
|                                                                      | 3 or more days/week |                                                           |                     | 55.8                                                              | 44.2                | 33.2                                                            | 66.8                | 36.0                                                         | 64.0                |
| P for association                                                    |                     |                                                           |                     | <0.001                                                            |                     | 0.003                                                           |                     | 0.001                                                        |                     |
| <b>Frequency child attends sport/exercise club outside of school</b> | Up to 2 days/week   | 79.0                                                      | 21.0                |                                                                   |                     | 40.2                                                            | 59.8                | 46.8                                                         | 53.2                |
|                                                                      | 3 or more days/week | 59.7                                                      | 40.3                |                                                                   |                     | 40.0                                                            | 60.0                | 38.2                                                         | 61.8                |
| P for association                                                    |                     | <0.001                                                    |                     |                                                                   |                     | 0.94                                                            |                     | 0.006                                                        |                     |
| <b>Frequency child plays with friends/family outside near home</b>   | Up to 2 days/week   | 78.0                                                      | 22.0                | 71.0                                                              | 29.0                |                                                                 |                     | 65.1                                                         | 34.9                |
|                                                                      | 3 or more days/week | 70.3                                                      | 29.7                | 70.8                                                              | 29.2                |                                                                 |                     | 30.3                                                         | 69.7                |
| P for association                                                    |                     | 0.003                                                     |                     | 0.94                                                              |                     |                                                                 |                     | <0.001                                                       |                     |
| <b>Frequency child plays with friends/family in home/garden</b>      | Up to 2 days/week   | 78.3                                                      | 21.7                | 74.9                                                              | 25.1                | 59.0                                                            | 41.0                |                                                              |                     |
|                                                                      | 3 or more days/week | 69.4                                                      | 30.6                | 67.6                                                              | 32.4                | 25.2                                                            | 74.8                |                                                              |                     |
| P for association                                                    |                     | 0.001                                                     |                     | 0.006                                                             |                     | <0.001                                                          |                     |                                                              |                     |
| <b>Total</b>                                                         |                     | <b>73.4</b>                                               | <b>26.6</b>         | <b>70.8</b>                                                       | <b>29.2</b>         | <b>40.2</b>                                                     | <b>59.8</b>         | <b>44.3</b>                                                  | <b>55.7</b>         |

\* Percentages presented are the proportions of children in each row that belong to each of the categories of child activity variables listed along the top of the table.

**Table S4 Mean difference in the children's average sedentary minutes per day associated with different activities for those with complete data (N=987)\***

| Exposure                                                      | Sedentary time (minutes/day): mean difference (95% confidence interval) |               |                |                |               |               |                | P for gender interaction |                |
|---------------------------------------------------------------|-------------------------------------------------------------------------|---------------|----------------|----------------|---------------|---------------|----------------|--------------------------|----------------|
|                                                               | All (N=987)                                                             |               | Boys (N=439)   |                | Girls (N=548) |               |                |                          |                |
|                                                               | Model 1                                                                 | Model 2       | Model 1        | Model 2        | Model 1       | Model 2       |                |                          |                |
| Frequency child attends sport/exercise club at school         | Never (ref)                                                             | 0             | 0              | 0              | 0             | 0             | 0              | 0.45                     |                |
|                                                               | 1-2 days/week                                                           | -0.29         | 0.0            | 14.7           | 15.9          | -11.4         | -11.9          |                          |                |
|                                                               | 3-4 days/week                                                           |               | (-21.3, 20.7)  | (-21.2, 21.3)  | (-10.1, 39.5) | (-9.2, 41.0)  | (-39.7, 16.8)  |                          | (-41.1, 17.3)  |
|                                                               |                                                                         | 5 days/week   | -26.3          | -24.1          | -13.8         | -9.9          | -36.0          |                          | -35.4          |
|                                                               |                                                                         |               | (-40.8, -11.8) | (-37.8, -10.4) | (-31.5, 4.0)  | (-29.3, 9.4)  | (-59.5, -12.4) |                          | (-59.0, -11.7) |
|                                                               | -16.0                                                                   | -16.1         | -7.1           | -3.1           | -22.0         | -29.8         |                |                          |                |
|                                                               |                                                                         | (-35.3, 3.3)  | (-34.4, 2.3)   | (-29.7, 15.4)  | (-26.9, 20.6) | (-54.6, 10.7) | (-69.2, 9.66)  |                          |                |
| P for trend                                                   |                                                                         | 0.01          | 0.009          | 0.19           | 0.40          | 0.02          | 0.02           |                          |                |
| Frequency child attends sport/exercise club outside of school | Never (ref)                                                             | 0             | 0              | 0              | 0             | 0             | 0              | 0.73                     |                |
|                                                               | 1-2 days/week                                                           | 16.1          | 20.0           | 24.6           | 31.2          | 10.8          | 12.9           |                          |                |
|                                                               | 3-4 days/week                                                           |               | (-7.5, 39.7)   | (-7.0, 47.0)   | (-3.4, 52.7)  | (0.6, 61.8)   | (-19.3, 41.0)  |                          | (-20.0, 45.9)  |
|                                                               |                                                                         | 5 days/week   | -6.6           | 0.1            | -3.2          | 5.6           | -7.6           |                          | -2.0           |
|                                                               |                                                                         |               | (-23.2, 10.1)  | (-19.6, 19.8)  | (-28.8, 22.3) | (-17.7, 28.8) | (-26.3, 11.1)  |                          | (-26.7, 22.6)  |
|                                                               | -18.4                                                                   | -13.8         | -13.0          | -5.9           | -20.8         | -18.2         |                |                          |                |
|                                                               |                                                                         | (-36.5, -0.2) | (-33.8, 6.2)   | (-36.3, 10.4)  | (-28.8, 16.9) | (-46.0, 4.3)  | (-46.4, 10.0)  |                          |                |
| P for trend                                                   |                                                                         | 0.009         | 0.05           | 0.02           | 0.03          | 0.08          | 0.28           |                          |                |
| Frequency child plays with friends/family outside near home   | Never (ref)                                                             | 0             | 0              | 0              | 0             | 0             | 0              | 0.68                     |                |
|                                                               | 1-2 days/week                                                           | 4.5           | 6.0            | 16.3           | 20.2          | -5.7          | -7.1           |                          |                |
|                                                               | 3-4 days/week                                                           |               | (-26.7, 35.7)  | (-27.5, 39.5)  | (-13.4, 45.9) | (-10.1, 50.4) | (-55.7, 44.3)  |                          | (-59.0, 44.9)  |
|                                                               |                                                                         | 5 days/week   | -2.5           | -0.6           | 8.3           | 13.0          | -11.9          |                          | -13.2          |
|                                                               |                                                                         |               | (-30.1, 25.0)  | (-31.6, 30.3)  | (-23.1, 39.7) | (-19.4, 45.4) | (-68.1, 44.3)  |                          | (-71.3, 44.9)  |
|                                                               | -21.6                                                                   | -21.9         | -9.4           | -6.4           | -32.3         | -36.4         |                |                          |                |
|                                                               |                                                                         | (-49.0, 5.7)  | (-50.4, 6.6)   | (-35.4, 16.6)  | (-32.8, 20.0) | (-78.9, 14.2) | (-86.0, 13.1)  |                          |                |
| P for trend                                                   |                                                                         | <0.001        | <0.001         | 0.08           | 0.08          | 0.009         | 0.01           |                          |                |
| Frequency child plays with friends/family in home/garden      | Never (ref)                                                             | 0             | 0              | 0              | 0             | 0             | 0              | 0.86                     |                |
|                                                               | 1-2 days/week                                                           | 18.2          | 18.8           | 19.2           | 19.5          | 17.2          | 17.6           |                          |                |
|                                                               | 3-4 days/week                                                           |               | (-12.4, 48.8)  | (-12.4, 50.0)  | (-13.8, 52.2) | (-13.7, 52.8) | (-25.4, 59.9)  |                          | (-25.4, 60.6)  |
|                                                               |                                                                         | 5 days/week   | -4.5           | -1.9           | 2.8           | 4.6           | -10.1          |                          | -7.5           |
|                                                               |                                                                         |               | (-27.3, 18.2)  | (-26.7, 22.9)  | (-16.3, 21.9) | (-15.7, 25.0) | (-47.3, 27.0)  |                          | (-47.1, 32.1)  |
|                                                               | 3.8                                                                     | 3.6           | 10.8           | 11.6           | -2.2          | -3.5          |                |                          |                |
|                                                               |                                                                         | (-24.6, 32.2) | (-24.6, 31.8)  | (-27.1, 48.8)  | (-27.0, 50.2) | (-43.0, 38.6) | (-45.3, 38.3)  |                          |                |
| P for trend                                                   |                                                                         | 0.24          | 0.22           | 0.85           | 0.89          | 0.25          | 0.24           |                          |                |
| Activity score (per unit)                                     |                                                                         | -4.9          | -4.7           | -3.5           | -2.9          | -6.3          | -6.6           | 0.28                     |                |
|                                                               |                                                                         | (-7.2, -2.7)  | (-6.9, -2.4)   | (-6.6, -0.4)   | (-6.0, 0.2)   | (-10.7, -2.0) | (-11.2, -1.9)  |                          |                |

\* Model 1 is adjusted for age and gender; Model 2 is additionally adjusted for BMI and IMD score

For peer review only - <http://bmjopen.bmj.com/site/about/guidelines.xhtml>

**Table S5 Mean difference in the children's average MVPA minutes per day associated with different activities for those with complete data (N=987)\***

| Exposure                                                      |               | Moderate-to-vigorous physical activity (minutes/day): mean difference (95% confidence interval) |                      |                      |                      |                      |                      | P for gender interaction |
|---------------------------------------------------------------|---------------|-------------------------------------------------------------------------------------------------|----------------------|----------------------|----------------------|----------------------|----------------------|--------------------------|
|                                                               |               | All (N=987)                                                                                     |                      | Boys (N=439)         |                      | Girls (N=548)        |                      |                          |
|                                                               |               | Model 1                                                                                         | Model 2              | Model 1              | Model 2              | Model 1              | Model 2              |                          |
| Frequency child attends sport/exercise club at school         | Never (ref)   | 0                                                                                               | 0                    | 0                    | 0                    | 0                    | 0                    | 0.64                     |
|                                                               | 1-2 days/week | 3.2<br>(-0.4, 6.8)                                                                              | 3.1<br>(-0.5, 6.6)   | 3.3<br>(-3.3, 9.8)   | 2.7<br>(-3.7, 9.2)   | 3.1<br>(-0.5, 6.8)   | 3.1<br>(-0.6, 6.8)   |                          |
|                                                               | 3-4 days/week | 6.7<br>(1.7, 11.8)                                                                              | 6.4<br>(1.4, 11.4)   | 8.0<br>(1.0, 15.1)   | 7.3<br>(0.1, 14.4)   | 5.7<br>(0.6, 10.7)   | 5.6<br>(0.5, 10.7)   |                          |
|                                                               | 5 days/week   | 5.3<br>(-1.3, 11.9)                                                                             | 5.1<br>(-1.5, 11.8)  | 6.6<br>(-1.4, 14.6)  | 5.8<br>(-2.2, 13.8)  | 3.2<br>(-5.0, 11.5)  | 3.1<br>(-5.5, 11.6)  |                          |
|                                                               | P for trend   | 0.02                                                                                            | 0.03                 | 0.02                 | 0.05                 | 0.08                 | 0.10                 |                          |
| Frequency child attends sport/exercise club outside of school | Never (ref)   | 0                                                                                               | 0                    | 0                    | 0                    | 0                    | 0                    | 0.53                     |
|                                                               | 1-2 days/week | 1.8<br>(-1.9, 5.5)                                                                              | 1.5<br>(-2.4, 5.4)   | 4.3<br>(-3.2, 11.9)  | 3.6<br>(-4.4, 11.7)  | 0.4<br>(-3.5, 4.3)   | 0.4<br>(-3.5, 4.4)   |                          |
|                                                               | 3-4 days/week | 7.3<br>(3.0, 11.5)                                                                              | 6.7<br>(2.4, 11.0)   | 10.5<br>(2.8, 18.2)  | 9.0<br>(1.4, 16.6)   | 5.3<br>(0.6, 10.0)   | 5.5<br>(0.9, 10.0)   |                          |
|                                                               | 5 days/week   | 10.5<br>(4.6, 16.5)                                                                             | 10.1<br>(3.9, 16.2)  | 14.3<br>(6.3, 22.3)  | 13.4<br>(4.8, 22.0)  | 7.3<br>(-0.8, 15.3)  | 7.3<br>(-0.6, 15.2)  |                          |
|                                                               | P for trend   | <0.001                                                                                          | <0.001               | <0.001               | <0.001               | 0.01                 | 0.008                |                          |
| Frequency child plays with friends/family outside near home   | Never (ref)   | 0                                                                                               | 0                    | 0                    | 0                    | 0                    | 0                    | 0.32                     |
|                                                               | 1-2 days/week | 0.7<br>(-4.1, 5.5)                                                                              | 0.4<br>(-4.3, 5.0)   | 1.2<br>(-7.4, 9.7)   | 0.5<br>(-8.1, 9.1)   | 0.4<br>(-6.0, 6.9)   | 0.3<br>(-6.3, 6.9)   |                          |
|                                                               | 3-4 days/week | 5.2<br>(-0.8, 11.2)                                                                             | 4.9<br>(-1.0, 10.7)  | 6.7<br>(-3.5, 16.9)  | 6.0<br>(-4.0, 15.9)  | 4.0<br>(-3.6, 11.7)  | 3.9<br>(-3.8, 11.7)  |                          |
|                                                               | 5 days/week   | 9.9<br>(4.4, 15.4)                                                                              | 9.7<br>(4.2, 15.1)   | 13.8<br>(4.6, 23.0)  | 13.3<br>(4.0, 22.5)  | 6.5<br>(-0.5, 13.5)  | 6.4<br>(-0.7, 13.6)  |                          |
|                                                               | P for trend   | <0.001                                                                                          | <0.001               | <0.001               | <0.001               | 0.004                | 0.005                |                          |
| Frequency child plays with friends/family in home/garden      | Never (ref)   | 0                                                                                               | 0                    | 0                    | 0                    | 0                    | 0                    | 0.40                     |
|                                                               | 1-2 days/week | 2.5<br>(-0.9, 6.0)                                                                              | 2.2<br>(-1.4, 5.8)   | 0.6<br>(-7.0, 8.2)   | 0.4<br>(-7.4, 8.2)   | 4.1<br>(-0.9, 9.2)   | 4.0<br>(-1.1, 9.1)   |                          |
|                                                               | 3-4 days/week | 6.6<br>(2.4, 10.7)                                                                              | 6.3<br>(1.8, 10.8)   | 6.7<br>(-1.8, 15.3)  | 6.9<br>(-1.9, 15.7)  | 6.5<br>(0.4, 12.6)   | 6.4<br>(0.1, 12.7)   |                          |
|                                                               | 5 days/week   | 8.6<br>(4.6, 12.5)                                                                              | 8.4<br>(4.3, 12.6)   | 9.3<br>(1.6, 16.9)   | 9.1<br>(1.0, 17.2)   | 7.9<br>(2.5, 13.3)   | 7.8<br>(2.4, 13.3)   |                          |
|                                                               | P for trend   | <0.001                                                                                          | <0.001               | 0.001                | 0.001                | 0.003                | 0.003                |                          |
| Activity score (per unit)                                     |               | 2.13<br>(1.44, 2.82)                                                                            | 2.09<br>(1.37, 2.81) | 2.58<br>(1.73, 3.43) | 2.49<br>(1.55, 3.42) | 1.67<br>(0.86, 2.47) | 1.66<br>(0.85, 2.48) | 0.07                     |

\* MVPA Moderate-to-vigorous physical activity; Model 1 is adjusted for age and gender; Model 2 is additionally adjusted for BMI and IMD score

Table S6 Odds ratios for achieving 60 minutes of MVPA per day associated with different activities for those with complete data (N=987)\*

| Exposure                                                      |               | Meeting government guideline: odds ratio (95% confidence interval) |                      |                      |                      |                      |                      | P for gender interaction |
|---------------------------------------------------------------|---------------|--------------------------------------------------------------------|----------------------|----------------------|----------------------|----------------------|----------------------|--------------------------|
|                                                               |               | All (N=987)                                                        |                      | Boys (N=439)         |                      | Girls (N=548)        |                      |                          |
|                                                               |               | Model 1                                                            | Model 2              | Model 1              | Model 2              | Model 1              | Model 2              |                          |
| Frequency child attends sport/exercise club at school         | Never (ref)   | 1                                                                  | 1                    | 1                    | 1                    | 1                    | 1                    | 0.25                     |
|                                                               | 1-2 days/week | 1.27<br>(0.94, 1.71)                                               | 1.25<br>(0.93, 1.69) | 0.97<br>(0.58, 1.63) | 0.93<br>(0.55, 1.55) | 1.57<br>(1.09, 2.25) | 1.57<br>(1.09, 2.26) |                          |
|                                                               | 3-4 days/week | 1.77<br>(1.05, 2.97)                                               | 1.72<br>(1.03, 2.87) | 1.97<br>(0.93, 4.18) | 1.86<br>(0.88, 3.95) | 1.65<br>(0.93, 2.91) | 1.66<br>(0.94, 2.92) |                          |
|                                                               | 5 days/week   | 1.63<br>(0.96, 2.77)                                               | 1.61<br>(0.95, 2.74) | 1.49<br>(0.75, 2.96) | 1.40<br>(0.70, 2.77) | 1.73<br>(0.78, 3.85) | 1.76<br>(0.78, 3.96) |                          |
| P for trend                                                   |               | 0.03                                                               | 0.03                 | 0.06                 | 0.10                 | 0.07                 | 0.07                 |                          |
| Frequency child attends sport/exercise club outside of school | Never (ref)   | 1                                                                  | 1                    | 1                    | 1                    | 1                    | 1                    | 0.66                     |
|                                                               | 1-2 days/week | 1.32<br>(0.91, 1.91)                                               | 1.29<br>(0.88, 1.88) | 1.53<br>(0.89, 2.62) | 1.46<br>(0.83, 2.57) | 1.19<br>(0.72, 1.97) | 1.21<br>(0.74, 1.99) |                          |
|                                                               | 3-4 days/week | 2.06<br>(1.38, 3.07)                                               | 1.97<br>(1.32, 2.95) | 2.56<br>(1.32, 4.98) | 2.28<br>(1.18, 4.40) | 1.77<br>(1.05, 2.98) | 1.81<br>(1.09, 3.03) |                          |
|                                                               | 5 days/week   | 2.89<br>(1.76, 4.73)                                               | 2.80<br>(1.69, 4.63) | 4.13<br>(1.97, 8.68) | 3.92<br>(1.82, 8.44) | 2.09<br>(1.06, 4.12) | 2.14<br>(1.10, 4.18) |                          |
| P for trend                                                   |               | <0.001                                                             | <0.001               | <0.001               | <0.001               | 0.006                | 0.004                |                          |
| Frequency child plays with friends/family outside near home   | Never (ref)   | 1                                                                  | 1                    | 1                    | 1                    | 1                    | 1                    | 0.89                     |
|                                                               | 1-2 days/week | 1.16<br>(0.70, 1.92)                                               | 1.13<br>(0.70, 1.85) | 1.03<br>(0.46, 2.29) | 0.98<br>(0.43, 2.22) | 1.40<br>(0.59, 3.30) | 1.41<br>(0.60, 3.29) |                          |
|                                                               | 3-4 days/week | 1.94<br>(1.12, 3.35)                                               | 1.89<br>(1.12, 3.21) | 1.59<br>(0.68, 3.75) | 1.53<br>(0.65, 3.62) | 2.43<br>(0.92, 6.45) | 2.46<br>(0.94, 6.42) |                          |
|                                                               | 5 days/week   | 2.14<br>(1.26, 3.65)                                               | 2.12<br>(1.26, 3.57) | 2.01<br>(0.88, 4.63) | 1.97<br>(0.85, 4.54) | 2.45<br>(0.95, 6.36) | 2.49<br>(0.97, 6.40) |                          |
| P for trend                                                   |               | <0.001                                                             | <0.001               | 0.007                | 0.005                | 0.007                | 0.006                |                          |
| Frequency child plays with friends/family in home/garden      | Never (ref)   | 1                                                                  | 1                    | 1                    | 1                    | 1                    | 1                    | 0.30                     |
|                                                               | 1-2 days/week | 1.33<br>(0.88, 2.00)                                               | 1.30<br>(0.86, 1.97) | 0.96<br>(0.51, 1.78) | 0.94<br>(0.50, 1.77) | 1.92<br>(0.90, 4.11) | 1.94<br>(0.91, 4.12) |                          |
|                                                               | 3-4 days/week | 1.67<br>(1.10, 2.54)                                               | 1.64<br>(1.07, 2.52) | 1.33<br>(0.66, 2.69) | 1.36<br>(0.66, 2.82) | 2.15<br>(0.96, 4.79) | 2.16<br>(0.97, 4.80) |                          |
|                                                               | 5 days/week   | 1.86<br>(1.21, 2.86)                                               | 1.85<br>(1.20, 2.86) | 1.68<br>(0.86, 3.25) | 1.67<br>(0.84, 3.32) | 2.18<br>(1.04, 4.60) | 2.20<br>(1.04, 4.62) |                          |
| P for trend                                                   |               | 0.002                                                              | 0.002                | 0.008                | 0.008                | 0.06                 | 0.06                 |                          |
| Activity score (per unit)                                     |               | 1.19<br>(1.12, 1.26)                                               | 1.19<br>(1.12, 1.26) | 1.20<br>(1.11, 1.30) | 1.19<br>(1.10, 1.30) | 1.18<br>(1.09, 1.28) | 1.18<br>(1.09, 1.28) | 0.79                     |

\* MVPA Moderate-to-vigorous physical activity; Model 1 is adjusted for age and gender; Model 2 is additionally adjusted for BMI and IMD score
