# Supplementary material for: Associations between participation in organised physical activity in the school or community outside school hours and neighbourhood play with child physical activity and sedentary time: a cross-sectional analysis of primary school-aged children from the UK
Source: PubMed Central journal article supplement (PMC5640140; doi:10.1136/bmjopen-2017-017588), 2017-09-14
Supplement: bmjopen-2017-017588supp001.pdf [file bmjopen-2017-017588supp001.pdf]

**Table S1 Frequencies of sport/exercise club attendance and play outside and inside the home and mean activity score by gender in the observed data**

|                                                                      |               | <b>Boys</b><br>N (%) | <b>Girls</b><br>N (%) | <b>Chi-squared p-value for association</b>  |             |           |
|----------------------------------------------------------------------|---------------|----------------------|-----------------------|---------------------------------------------|-------------|-----------|
| <b>Frequency child attends sport/exercise club at school</b>         | Never         | 144 (25.9)           | 194 (29.4)            | <0.001                                      |             |           |
|                                                                      | 1-2 days/week | 235 (42.3)           | 318 (48.2)            |                                             |             |           |
|                                                                      | 3-4 days/week | 90 (16.2)            | 106 (16.1)            |                                             |             |           |
|                                                                      | 5 days/week   | 86 (15.5)            | 42 (6.4)              |                                             |             |           |
| <b>Frequency child attends sport/exercise club outside of school</b> | Never         | 85 (15.3)            | 165 (25.0)            | <0.001                                      |             |           |
|                                                                      | 1-2 days/week | 289 (52.1)           | 321 (48.7)            |                                             |             |           |
|                                                                      | 3-4 days/week | 121 (21.8)           | 132 (20.0)            |                                             |             |           |
|                                                                      | 5 days/week   | 60 (10.8)            | 41 (6.2)              |                                             |             |           |
| <b>Frequency child plays with friends/family outside near home</b>   | Never         | 36 (6.6)             | 40 (6.1)              | 0.14                                        |             |           |
|                                                                      | 1-2 days/week | 187 (34.1)           | 219 (33.4)            |                                             |             |           |
|                                                                      | 3-4 days/week | 142 (25.9)           | 207 (31.6)            |                                             |             |           |
|                                                                      | 5 days/week   | 184 (33.5)           | 190 (29.0)            |                                             |             |           |
| <b>Frequency child plays with friends/family in home/garden</b>      | Never         | 53 (9.7)             | 62 (9.5)              | 0.76                                        |             |           |
|                                                                      | 1-2 days/week | 184 (33.7)           | 230 (35.2)            |                                             |             |           |
|                                                                      | 3-4 days/week | 142 (26.0)           | 179 (27.4)            |                                             |             |           |
|                                                                      | 5 days/week   | 167 (30.6)           | 182 (27.9)            |                                             |             |           |
|                                                                      |               | <b>Boys</b>          | <b>Girls</b>          | <b>T-test p-value for gender difference</b> |             |           |
|                                                                      |               | N                    | Mean (SD)             |                                             | N           | Mean (SD) |
| <b>Activity frequency score</b>                                      |               | 542                  | 6.15 (2.42)           | 651                                         | 5.65 (2.16) | <0.001    |

**Table S2 Child characteristics by frequencies of sport/exercise club attendance and play outside and inside the home and activity score in the observed data**

|                                                                      |               | Age (years) |         | BMI z score |         | IMD score     |         |
|----------------------------------------------------------------------|---------------|-------------|---------|-------------|---------|---------------|---------|
|                                                                      |               | Mean (SD)   | N       | Mean (SD)   | N       | Mean (SD)     | N       |
| <b>Frequency child attends sport/exercise club at school</b>         | Never         | 9.03 (0.38) | 1215    | 0.43 (1.14) | 1202    | 17.30 (15.04) | 1197    |
|                                                                      | 1-2 days/week | 9.05 (0.43) |         | 0.35 (1.05) |         | 15.54 (14.02) |         |
|                                                                      | 3-4 days/week | 9.00 (0.45) |         | 0.29 (1.02) |         | 14.15 (11.07) |         |
|                                                                      | 5 days/week   | 8.99 (0.39) |         | 0.27 (1.13) |         | 16.66 (15.10) |         |
| P-value for difference between categories*                           |               | 0.31        |         | 0.36        |         | 0.07          |         |
| <b>Frequency child attends sport/exercise club outside of school</b> | Never         | 9.01 (0.40) | 1214    | 0.47 (1.07) | 1201    | 20.03 (16.06) | 1196    |
|                                                                      | 1-2 days/week | 9.01 (0.43) |         | 0.37 (1.09) |         | 16.02 (14.12) |         |
|                                                                      | 3-4 days/week | 9.05 (0.41) |         | 0.23 (1.07) |         | 12.30 (10.25) |         |
|                                                                      | 5 days/week   | 9.12 (0.39) |         | 0.30 (1.06) |         | 14.26 (13.64) |         |
| P-value for difference between categories*                           |               | 0.05        |         | 0.09        |         | <0.001        |         |
| <b>Frequency child plays with friends/family outside near home</b>   | Never         | 8.96 (0.47) | 1205    | 0.48 (1.24) | 1192    | 17.60 (16.02) | 1187    |
|                                                                      | 1-2 days/week | 9.01 (0.42) |         | 0.31 (1.06) |         | 15.20 (13.83) |         |
|                                                                      | 3-4 days/week | 9.05 (0.41) |         | 0.39 (1.07) |         | 14.66 (12.48) |         |
|                                                                      | 5 days/week   | 9.05 (0.40) |         | 0.33 (1.08) |         | 17.66 (15.08) |         |
| P-value for difference between categories*                           |               | 0.23        |         | 0.58        |         | 0.01          |         |
| <b>Frequency child plays with friends/family in home/garden</b>      | Never         | 8.97 (0.38) | 1199    | 0.50 (1.11) | 1186    | 18.54 (15.94) | 1181    |
|                                                                      | 1-2 days/week | 9.02 (0.45) |         | 0.29 (1.09) |         | 15.85 (13.95) |         |
|                                                                      | 3-4 days/week | 9.06 (0.41) |         | 0.40 (1.07) |         | 14.24 (12.79) |         |
|                                                                      | 5 days/week   | 9.03 (0.39) |         | 0.32 (1.07) |         | 16.85 (14.55) |         |
| P-value for difference between categories*                           |               | 0.31        |         | 0.23        |         | 0.02          |         |
|                                                                      |               | Correlation | P-value | Correlation | P-value | Correlation   | P-value |
| <b>Activity frequency score</b>                                      |               | 0.04        | 0.13    | -0.05       | 0.07    | -0.07         | 0.02    |

**Table S3 Pairwise comparisons of children’s activity attendance frequencies in the multiple imputation data (N=1223)\***

|                                                                      |                     | Frequency child attends sport/exercise club at school (%) |                     | Frequency child attends sport/exercise club outside of school (%) |                     | Frequency child plays with friends/family outside near home (%) |                     | Frequency child plays with friends/family in home/garden (%) |                     |
|----------------------------------------------------------------------|---------------------|-----------------------------------------------------------|---------------------|-------------------------------------------------------------------|---------------------|-----------------------------------------------------------------|---------------------|--------------------------------------------------------------|---------------------|
|                                                                      |                     | Up to 2 days/week                                         | 3 or more days/week | Up to 2 days/week                                                 | 3 or more days/week | Up to 2 days/week                                               | 3 or more days/week | Up to 2 days/week                                            | 3 or more days/week |
| <b>Frequency child attends sport/exercise club at school</b>         | Up to 2 days/week   |                                                           |                     | 76.3                                                              | 23.7                | 42.7                                                            | 57.3                | 47.3                                                         | 52.7                |
|                                                                      | 3 or more days/week |                                                           |                     | 55.8                                                              | 44.2                | 33.2                                                            | 66.8                | 36.0                                                         | 64.0                |
| P for association                                                    |                     |                                                           |                     | <0.001                                                            |                     | 0.003                                                           |                     | 0.001                                                        |                     |
| <b>Frequency child attends sport/exercise club outside of school</b> | Up to 2 days/week   | 79.0                                                      | 21.0                |                                                                   |                     | 40.2                                                            | 59.8                | 46.8                                                         | 53.2                |
|                                                                      | 3 or more days/week | 59.7                                                      | 40.3                |                                                                   |                     | 40.0                                                            | 60.0                | 38.2                                                         | 61.8                |
| P for association                                                    |                     | <0.001                                                    |                     |                                                                   |                     | 0.94                                                            |                     | 0.006                                                        |                     |
| <b>Frequency child plays with friends/family outside near home</b>   | Up to 2 days/week   | 78.0                                                      | 22.0                | 71.0                                                              | 29.0                |                                                                 |                     | 65.1                                                         | 34.9                |
|                                                                      | 3 or more days/week | 70.3                                                      | 29.7                | 70.8                                                              | 29.2                |                                                                 |                     | 30.3                                                         | 69.7                |
| P for association                                                    |                     | 0.003                                                     |                     | 0.94                                                              |                     |                                                                 |                     | <0.001                                                       |                     |
| <b>Frequency child plays with friends/family in home/garden</b>      | Up to 2 days/week   | 78.3                                                      | 21.7                | 74.9                                                              | 25.1                | 59.0                                                            | 41.0                |                                                              |                     |
|                                                                      | 3 or more days/week | 69.4                                                      | 30.6                | 67.6                                                              | 32.4                | 25.2                                                            | 74.8                |                                                              |                     |
| P for association                                                    |                     | 0.001                                                     |                     | 0.006                                                             |                     | <0.001                                                          |                     |                                                              |                     |
| <b>Total</b>                                                         |                     | <b>73.4</b>                                               | <b>26.6</b>         | <b>70.8</b>                                                       | <b>29.2</b>         | <b>40.2</b>                                                     | <b>59.8</b>         | <b>44.3</b>                                                  | <b>55.7</b>         |

\* Percentages presented are the proportions of children in each row that belong to each of the categories of child activity variables listed along the top of the table.

**Table S4 Mean difference in the children's average sedentary minutes per day associated with different activities for those with complete data (N=987)\***

| Exposure                                                      |                      | Sedentary time (minutes/day): mean difference (95% confidence interval) |                         |                        |                       |                         |                         | P for gender interaction |
|---------------------------------------------------------------|----------------------|-------------------------------------------------------------------------|-------------------------|------------------------|-----------------------|-------------------------|-------------------------|--------------------------|
|                                                               |                      | All (N=987)                                                             |                         | Boys (N=439)           |                       | Girls (N=548)           |                         |                          |
|                                                               |                      | Model 1                                                                 | Model 2                 | Model 1                | Model 2               | Model 1                 | Model 2                 |                          |
| Frequency child attends sport/exercise club at school         | Never (ref)          | 0                                                                       | 0                       | 0                      | 0                     | 0                       | 0                       | 0.45                     |
|                                                               | 1-2 days/week        | -0.29<br>(-21.3, 20.7)                                                  | 0.0<br>(-21.2, 21.3)    | 14.7<br>(-10.1, 39.5)  | 15.9<br>(-9.2, 41.0)  | -11.4<br>(-39.7, 16.8)  | -11.9<br>(-41.1, 17.3)  |                          |
|                                                               | 3-4 days/week        | -26.3<br>(-40.8, -11.8)                                                 | -24.1<br>(-37.8, -10.4) | -13.8<br>(-31.5, 4.0)  | -9.9<br>(-29.3, 9.4)  | -36.0<br>(-59.5, -12.4) | -35.4<br>(-59.0, -11.7) |                          |
|                                                               | 5 days/week          | -16.0<br>(-35.3, 3.3)                                                   | -16.1<br>(-34.4, 2.3)   | -7.1<br>(-29.7, 15.4)  | -3.1<br>(-26.9, 20.6) | -22.0<br>(-54.6, 10.7)  | -29.8<br>(-69.2, 9.66)  |                          |
|                                                               | P for trend          | 0.01                                                                    | 0.009                   | 0.19                   | 0.40                  | 0.02                    | 0.02                    |                          |
| Frequency child attends sport/exercise club outside of school | Never (ref)          | 0                                                                       | 0                       | 0                      | 0                     | 0                       | 0                       | 0.73                     |
|                                                               | 1-2 days/week        | 16.1<br>(-7.5, 39.7)                                                    | 20.0<br>(-7.0, 47.0)    | 24.6<br>(-3.4, 52.7)   | 31.2<br>(0.6, 61.8)   | 10.8<br>(-19.3, 41.0)   | 12.9<br>(-20.0, 45.9)   |                          |
|                                                               | 3-4 days/week        | -6.6<br>(-23.2, 10.1)                                                   | 0.1<br>(-19.6, 19.8)    | -3.2<br>(-28.8, 22.3)  | 5.6<br>(-17.7, 28.8)  | -7.6<br>(-26.3, 11.1)   | -2.0<br>(-26.7, 22.6)   |                          |
|                                                               | 5 days/week          | -18.4<br>(-36.5, -0.2)                                                  | -13.8<br>(-33.8, 6.2)   | -13.0<br>(-36.3, 10.4) | -5.9<br>(-28.8, 16.9) | -20.8<br>(-46.0, 4.3)   | -18.2<br>(-46.4, 10.0)  |                          |
|                                                               | P for trend          | 0.009                                                                   | 0.05                    | 0.02                   | 0.03                  | 0.08                    | 0.28                    |                          |
| Frequency child plays with friends/family outside near home   | Never (ref)          | 0                                                                       | 0                       | 0                      | 0                     | 0                       | 0                       | 0.68                     |
|                                                               | 1-2 days/week        | 4.5<br>(-26.7, 35.7)                                                    | 6.0<br>(-27.5, 39.5)    | 16.3<br>(-13.4, 45.9)  | 20.2<br>(-10.1, 50.4) | -5.7<br>(-55.7, 44.3)   | -7.1<br>(-59.0, 44.9)   |                          |
|                                                               | 3-4 days/week        | -2.5<br>(-30.1, 25.0)                                                   | -0.6<br>(-31.6, 30.3)   | 8.3<br>(-23.1, 39.7)   | 13.0<br>(-19.4, 45.4) | -11.9<br>(-68.1, 44.3)  | -13.2<br>(-71.3, 44.9)  |                          |
|                                                               | 5 days/week          | -21.6<br>(-49.0, 5.7)                                                   | -21.9<br>(-50.4, 6.6)   | -9.4<br>(-35.4, 16.6)  | -6.4<br>(-32.8, 20.0) | -32.3<br>(-78.9, 14.2)  | -36.4<br>(-86.0, 13.1)  |                          |
|                                                               | P for trend          | <0.001                                                                  | <0.001                  | 0.08                   | 0.08                  | 0.009                   | 0.01                    |                          |
| Frequency child plays with friends/family in home/garden      | Never (ref)          | 0                                                                       | 0                       | 0                      | 0                     | 0                       | 0                       | 0.86                     |
|                                                               | 1-2 days/week        | 18.2<br>(-12.4, 48.8)                                                   | 18.8<br>(-12.4, 50.0)   | 19.2<br>(-13.8, 52.2)  | 19.5<br>(-13.7, 52.8) | 17.2<br>(-25.4, 59.9)   | 17.6<br>(-25.4, 60.6)   |                          |
|                                                               | 3-4 days/week        | -4.5<br>(-27.3, 18.2)                                                   | -1.9<br>(-26.7, 22.9)   | 2.8<br>(-16.3, 21.9)   | 4.6<br>(-15.7, 25.0)  | -10.1<br>(-47.3, 27.0)  | -7.5<br>(-47.1, 32.1)   |                          |
|                                                               | 5 days/week          | 3.8<br>(-24.6, 32.2)                                                    | 3.6<br>(-24.6, 31.8)    | 10.8<br>(-27.1, 48.8)  | 11.6<br>(-27.0, 50.2) | -2.2<br>(-43.0, 38.6)   | -3.5<br>(-45.3, 38.3)   |                          |
|                                                               | P for trend          | 0.24                                                                    | 0.22                    | 0.85                   | 0.89                  | 0.25                    | 0.24                    |                          |
| Activity score (per unit)                                     | -4.9<br>(-7.2, -2.7) | -4.7<br>(-6.9, -2.4)                                                    | -3.5<br>(-6.6, -0.4)    | -2.9<br>(-6.0, 0.2)    | -6.3<br>(-10.7, -2.0) | -6.6<br>(-11.2, -1.9)   | 0.28                    |                          |

\* Model 1 is adjusted for age and gender; Model 2 is additionally adjusted for BMI and IMD score

**Table S5 Mean difference in the children's average MVPA minutes per day associated with different activities for those with complete data (N=987)\***

| Exposure                                                      |               | Moderate-to-vigorous physical activity (minutes/day): mean difference (95% confidence interval) |                      |                      |                      |                      |                      | P for gender interaction |
|---------------------------------------------------------------|---------------|-------------------------------------------------------------------------------------------------|----------------------|----------------------|----------------------|----------------------|----------------------|--------------------------|
|                                                               |               | All (N=987)                                                                                     |                      | Boys (N=439)         |                      | Girls (N=548)        |                      |                          |
|                                                               |               | Model 1                                                                                         | Model 2              | Model 1              | Model 2              | Model 1              | Model 2              |                          |
| Frequency child attends sport/exercise club at school         | Never (ref)   | 0                                                                                               | 0                    | 0                    | 0                    | 0                    | 0                    | 0.64                     |
|                                                               | 1-2 days/week | 3.2<br>(-0.4, 6.8)                                                                              | 3.1<br>(-0.5, 6.6)   | 3.3<br>(-3.3, 9.8)   | 2.7<br>(-3.7, 9.2)   | 3.1<br>(-0.5, 6.8)   | 3.1<br>(-0.6, 6.8)   |                          |
|                                                               | 3-4 days/week | 6.7<br>(1.7, 11.8)                                                                              | 6.4<br>(1.4, 11.4)   | 8.0<br>(1.0, 15.1)   | 7.3<br>(0.1, 14.4)   | 5.7<br>(0.6, 10.7)   | 5.6<br>(0.5, 10.7)   |                          |
|                                                               | 5 days/week   | 5.3<br>(-1.3, 11.9)                                                                             | 5.1<br>(-1.5, 11.8)  | 6.6<br>(-1.4, 14.6)  | 5.8<br>(-2.2, 13.8)  | 3.2<br>(-5.0, 11.5)  | 3.1<br>(-5.5, 11.6)  |                          |
| P for trend                                                   |               | 0.02                                                                                            | 0.03                 | 0.02                 | 0.05                 | 0.08                 | 0.10                 |                          |
| Frequency child attends sport/exercise club outside of school | Never (ref)   | 0                                                                                               | 0                    | 0                    | 0                    | 0                    | 0                    | 0.53                     |
|                                                               | 1-2 days/week | 1.8<br>(-1.9, 5.5)                                                                              | 1.5<br>(-2.4, 5.4)   | 4.3<br>(-3.2, 11.9)  | 3.6<br>(-4.4, 11.7)  | 0.4<br>(-3.5, 4.3)   | 0.4<br>(-3.5, 4.4)   |                          |
|                                                               | 3-4 days/week | 7.3<br>(3.0, 11.5)                                                                              | 6.7<br>(2.4, 11.0)   | 10.5<br>(2.8, 18.2)  | 9.0<br>(1.4, 16.6)   | 5.3<br>(0.6, 10.0)   | 5.5<br>(0.9, 10.0)   |                          |
|                                                               | 5 days/week   | 10.5<br>(4.6, 16.5)                                                                             | 10.1<br>(3.9, 16.2)  | 14.3<br>(6.3, 22.3)  | 13.4<br>(4.8, 22.0)  | 7.3<br>(-0.8, 15.3)  | 7.3<br>(-0.6, 15.2)  |                          |
| P for trend                                                   |               | <0.001                                                                                          | <0.001               | <0.001               | <0.001               | 0.01                 | 0.008                |                          |
| Frequency child plays with friends/family outside near home   | Never (ref)   | 0                                                                                               | 0                    | 0                    | 0                    | 0                    | 0                    | 0.32                     |
|                                                               | 1-2 days/week | 0.7<br>(-4.1, 5.5)                                                                              | 0.4<br>(-4.3, 5.0)   | 1.2<br>(-7.4, 9.7)   | 0.5<br>(-8.1, 9.1)   | 0.4<br>(-6.0, 6.9)   | 0.3<br>(-6.3, 6.9)   |                          |
|                                                               | 3-4 days/week | 5.2<br>(-0.8, 11.2)                                                                             | 4.9<br>(-1.0, 10.7)  | 6.7<br>(-3.5, 16.9)  | 6.0<br>(-4.0, 15.9)  | 4.0<br>(-3.6, 11.7)  | 3.9<br>(-3.8, 11.7)  |                          |
|                                                               | 5 days/week   | 9.9<br>(4.4, 15.4)                                                                              | 9.7<br>(4.2, 15.1)   | 13.8<br>(4.6, 23.0)  | 13.3<br>(4.0, 22.5)  | 6.5<br>(-0.5, 13.5)  | 6.4<br>(-0.7, 13.6)  |                          |
| P for trend                                                   |               | <0.001                                                                                          | <0.001               | <0.001               | <0.001               | 0.004                | 0.005                |                          |
| Frequency child plays with friends/family in home/garden      | Never (ref)   | 0                                                                                               | 0                    | 0                    | 0                    | 0                    | 0                    | 0.40                     |
|                                                               | 1-2 days/week | 2.5<br>(-0.9, 6.0)                                                                              | 2.2<br>(-1.4, 5.8)   | 0.6<br>(-7.0, 8.2)   | 0.4<br>(-7.4, 8.2)   | 4.1<br>(-0.9, 9.2)   | 4.0<br>(-1.1, 9.1)   |                          |
|                                                               | 3-4 days/week | 6.6<br>(2.4, 10.7)                                                                              | 6.3<br>(1.8, 10.8)   | 6.7<br>(-1.8, 15.3)  | 6.9<br>(-1.9, 15.7)  | 6.5<br>(0.4, 12.6)   | 6.4<br>(0.1, 12.7)   |                          |
|                                                               | 5 days/week   | 8.6<br>(4.6, 12.5)                                                                              | 8.4<br>(4.3, 12.6)   | 9.3<br>(1.6, 16.9)   | 9.1<br>(1.0, 17.2)   | 7.9<br>(2.5, 13.3)   | 7.8<br>(2.4, 13.3)   |                          |
| P for trend                                                   |               | <0.001                                                                                          | <0.001               | 0.001                | 0.001                | 0.003                | 0.003                |                          |
| Activity score (per unit)                                     |               | 2.13<br>(1.44, 2.82)                                                                            | 2.09<br>(1.37, 2.81) | 2.58<br>(1.73, 3.43) | 2.49<br>(1.55, 3.42) | 1.67<br>(0.86, 2.47) | 1.66<br>(0.85, 2.48) | 0.07                     |

\* MVPA Moderate-to-vigorous physical activity; Model 1 is adjusted for age and gender; Model 2 is additionally adjusted for BMI and IMD score

**Table S6 Odds ratios for achieving 60 minutes of MVPA per day associated with different activities for those with complete data (N=987)\***

| Exposure                                                      |               | Meeting government guideline: odds ratio (95% confidence interval) |                      |                      |                      |                      |                      | P for gender interaction |
|---------------------------------------------------------------|---------------|--------------------------------------------------------------------|----------------------|----------------------|----------------------|----------------------|----------------------|--------------------------|
|                                                               |               | All (N=987)                                                        |                      | Boys (N=439)         |                      | Girls (N=548)        |                      |                          |
|                                                               |               | Model 1                                                            | Model 2              | Model 1              | Model 2              | Model 1              | Model 2              |                          |
| Frequency child attends sport/exercise club at school         | Never (ref)   | 1                                                                  | 1                    | 1                    | 1                    | 1                    | 1                    | 0.25                     |
|                                                               | 1-2 days/week | 1.27<br>(0.94, 1.71)                                               | 1.25<br>(0.93, 1.69) | 0.97<br>(0.58, 1.63) | 0.93<br>(0.55, 1.55) | 1.57<br>(1.09, 2.25) | 1.57<br>(1.09, 2.26) |                          |
|                                                               | 3-4 days/week | 1.77<br>(1.05, 2.97)                                               | 1.72<br>(1.03, 2.87) | 1.97<br>(0.93, 4.18) | 1.86<br>(0.88, 3.95) | 1.65<br>(0.93, 2.91) | 1.66<br>(0.94, 2.92) |                          |
|                                                               | 5 days/week   | 1.63<br>(0.96, 2.77)                                               | 1.61<br>(0.95, 2.74) | 1.49<br>(0.75, 2.96) | 1.40<br>(0.70, 2.77) | 1.73<br>(0.78, 3.85) | 1.76<br>(0.78, 3.96) |                          |
| P for trend                                                   |               | 0.03                                                               | 0.03                 | 0.06                 | 0.10                 | 0.07                 | 0.07                 |                          |
| Frequency child attends sport/exercise club outside of school | Never (ref)   | 1                                                                  | 1                    | 1                    | 1                    | 1                    | 1                    | 0.66                     |
|                                                               | 1-2 days/week | 1.32<br>(0.91, 1.91)                                               | 1.29<br>(0.88, 1.88) | 1.53<br>(0.89, 2.62) | 1.46<br>(0.83, 2.57) | 1.19<br>(0.72, 1.97) | 1.21<br>(0.74, 1.99) |                          |
|                                                               | 3-4 days/week | 2.06<br>(1.38, 3.07)                                               | 1.97<br>(1.32, 2.95) | 2.56<br>(1.32, 4.98) | 2.28<br>(1.18, 4.40) | 1.77<br>(1.05, 2.98) | 1.81<br>(1.09, 3.03) |                          |
|                                                               | 5 days/week   | 2.89<br>(1.76, 4.73)                                               | 2.80<br>(1.69, 4.63) | 4.13<br>(1.97, 8.68) | 3.92<br>(1.82, 8.44) | 2.09<br>(1.06, 4.12) | 2.14<br>(1.10, 4.18) |                          |
| P for trend                                                   |               | <0.001                                                             | <0.001               | <0.001               | <0.001               | 0.006                | 0.004                |                          |
| Frequency child plays with friends/family outside near home   | Never (ref)   | 1                                                                  | 1                    | 1                    | 1                    | 1                    | 1                    | 0.89                     |
|                                                               | 1-2 days/week | 1.16<br>(0.70, 1.92)                                               | 1.13<br>(0.70, 1.85) | 1.03<br>(0.46, 2.29) | 0.98<br>(0.43, 2.22) | 1.40<br>(0.59, 3.30) | 1.41<br>(0.60, 3.29) |                          |
|                                                               | 3-4 days/week | 1.94<br>(1.12, 3.35)                                               | 1.89<br>(1.12, 3.21) | 1.59<br>(0.68, 3.75) | 1.53<br>(0.65, 3.62) | 2.43<br>(0.92, 6.45) | 2.46<br>(0.94, 6.42) |                          |
|                                                               | 5 days/week   | 2.14<br>(1.26, 3.65)                                               | 2.12<br>(1.26, 3.57) | 2.01<br>(0.88, 4.63) | 1.97<br>(0.85, 4.54) | 2.45<br>(0.95, 6.36) | 2.49<br>(0.97, 6.40) |                          |
| P for trend                                                   |               | <0.001                                                             | <0.001               | 0.007                | 0.005                | 0.007                | 0.006                |                          |
| Frequency child plays with friends/family in home/garden      | Never (ref)   | 1                                                                  | 1                    | 1                    | 1                    | 1                    | 1                    | 0.30                     |
|                                                               | 1-2 days/week | 1.33<br>(0.88, 2.00)                                               | 1.30<br>(0.86, 1.97) | 0.96<br>(0.51, 1.78) | 0.94<br>(0.50, 1.77) | 1.92<br>(0.90, 4.11) | 1.94<br>(0.91, 4.12) |                          |
|                                                               | 3-4 days/week | 1.67<br>(1.10, 2.54)                                               | 1.64<br>(1.07, 2.52) | 1.33<br>(0.66, 2.69) | 1.36<br>(0.66, 2.82) | 2.15<br>(0.96, 4.79) | 2.16<br>(0.97, 4.80) |                          |
|                                                               | 5 days/week   | 1.86<br>(1.21, 2.86)                                               | 1.85<br>(1.20, 2.86) | 1.68<br>(0.86, 3.25) | 1.67<br>(0.84, 3.32) | 2.18<br>(1.04, 4.60) | 2.20<br>(1.04, 4.62) |                          |
| P for trend                                                   |               | 0.002                                                              | 0.002                | 0.008                | 0.008                | 0.06                 | 0.06                 |                          |
| Activity score (per unit)                                     |               | 1.19<br>(1.12, 1.26)                                               | 1.19<br>(1.12, 1.26) | 1.20<br>(1.11, 1.30) | 1.19<br>(1.10, 1.30) | 1.18<br>(1.09, 1.28) | 1.18<br>(1.09, 1.28) | 0.79                     |

\* MVPA Moderate-to-vigorous physical activity; Model 1 is adjusted for age and gender; Model 2 is additionally adjusted for BMI and IMD score
