# Supplementary material for: Associations between participation in organised physical activity in the school or community outside school hours and neighbourhood play with child physical activity and sedentary time: a cross-sectional analysis of primary school-aged children from the UK
Source: PubMed Central journal article supplement (PMC5640140; doi:10.1136/bmjopen-2017-017588), 2017-09-14

Figure S1 Scatter plot of sedentary time by activity score in the observed data (N=1003)

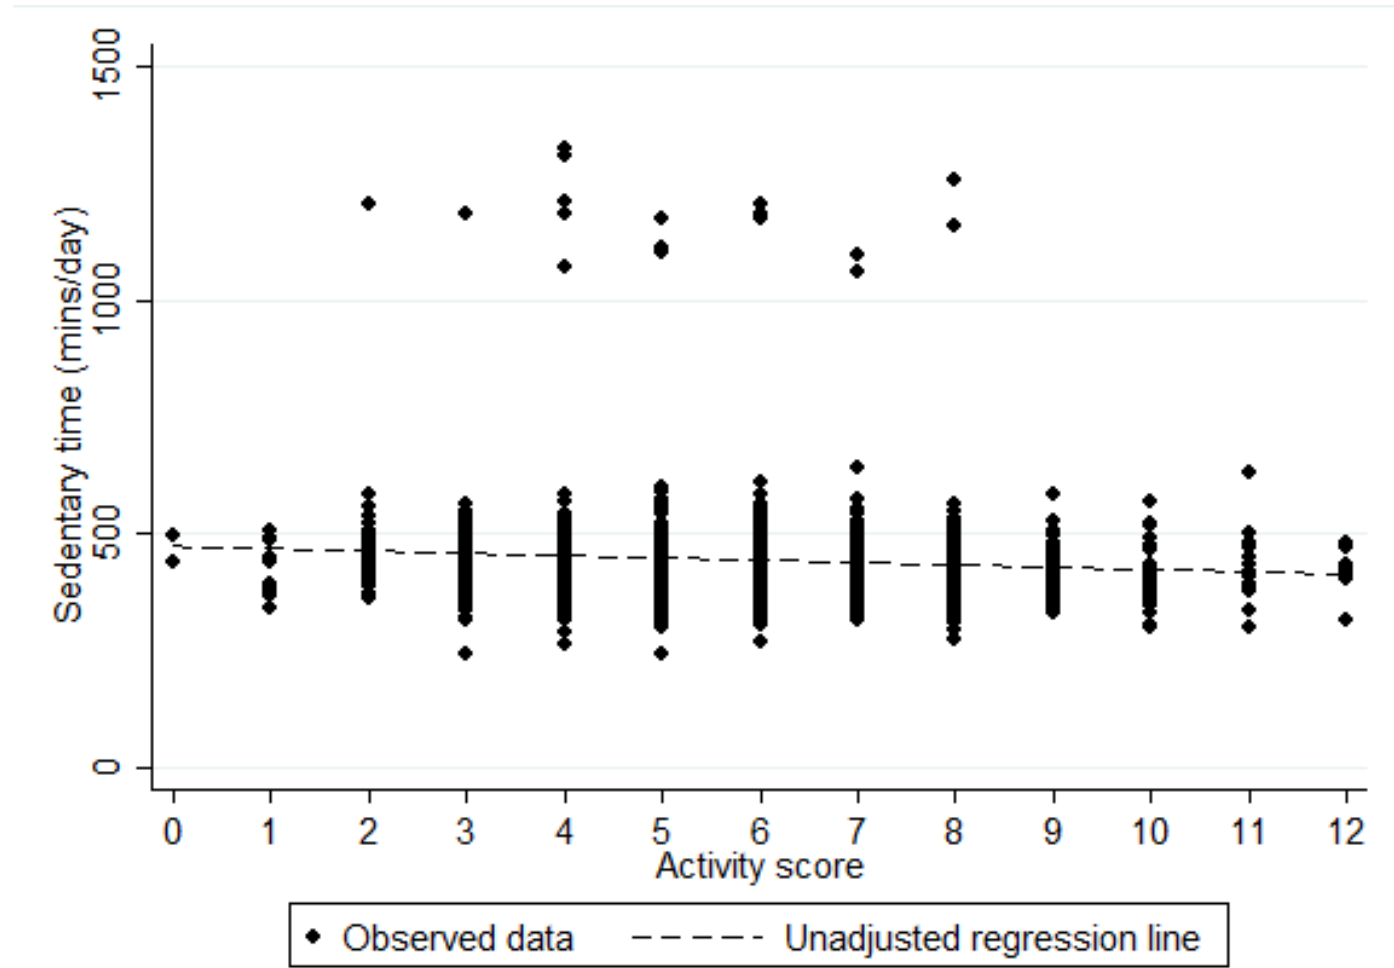

Figure S2 Scatter plot of time spent in moderate-to-vigorous physical activity by activity score in the observed data (N=1003)

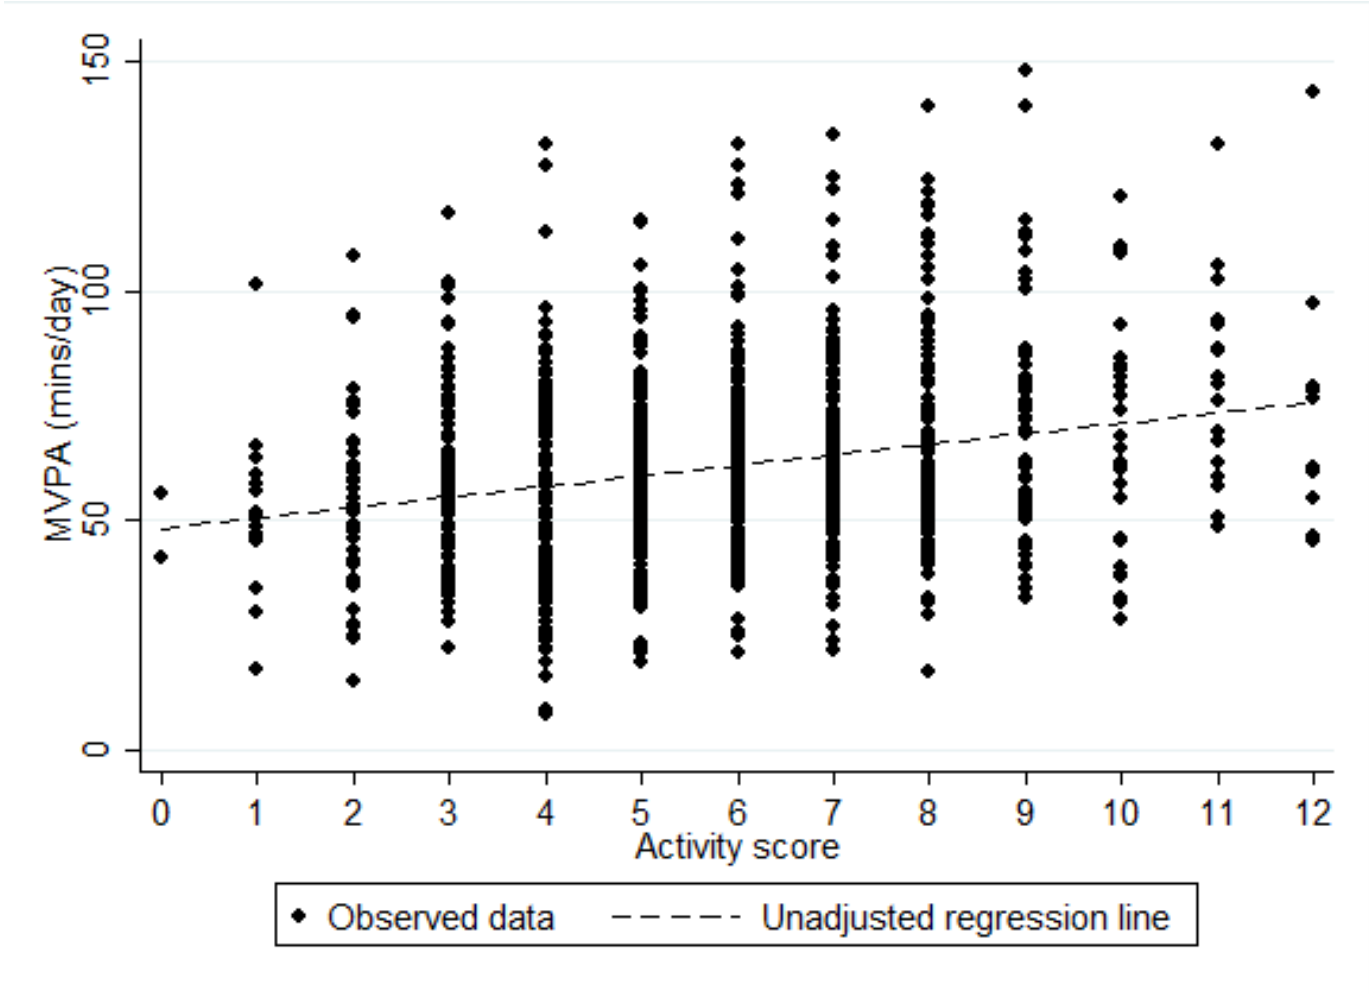

Supplement: bmjopen-2017-017588supp002.pdf [file bmjopen-2017-017588supp002.pdf]
